# Supplementary material for: Synthesis and in vitro biological evaluation of novel diaminothiophene scaffolds as antitumor and anti-influenza virus agents. Part 2
Source: Royal Society of Chemistry journal article supplement (doi:10.1039/c7ra04808d), 2017-01-01
Supplement: c7ra04808d1.pdf [file c7ra04808d1.pdf]

## Synthesis and *in Vitro* Biological Evaluation of Novel Diaminothiophene Scaffold as Antitumor and Anti-Influenza Virus Agents. Part 2

Khurshed Bozorov,<sup>ab</sup> Jiang-Yu Zhao,<sup>a</sup> Li-Fei Nie,<sup>ac</sup> Hai-Rong Ma,<sup>a</sup> Khayrulla Bobakulov,<sup>ab</sup> Rui Hu,<sup>ac</sup> Nigora Rustamova,<sup>ac</sup> Guozheng Huang,<sup>a</sup> Thomas Efferth<sup>d</sup> and Haji A. Aisa <sup>\*a</sup>

<sup>a</sup> Key Laboratory of Plant Resources and Chemistry in Arid Regions, Xinjiang Technical Institute of Physics and Chemistry, Chinese Academy of Sciences, South Beijing Road 40-1, Urumqi, Xinjiang 830011, PR China

<sup>b</sup> Institute of the Chemistry of Plant Substances, Academy of Sciences of Uzbekistan, 77, Mirzo Ulugbek str., 100170, Tashkent, Uzbekistan

<sup>c</sup> University of Chinese Academy of Sciences, 19 A Yuquan Rd, Beijing, 100049, PR China

<sup>d</sup> Department of Pharmaceutical Biology, Institute of Pharmacy and Biochemistry, University of Mainz, Mainz, Germany

<sup>1</sup>H NMR and <sup>13</sup>C NMR Spectra for compounds **2j**, **3a-p**, **4a-d** and **5a-c**

---

\* Corresponding author. E-mail address: [haji@ms.xjb.ac.cn](mailto:haji@ms.xjb.ac.cn) (H.A. Aisa)

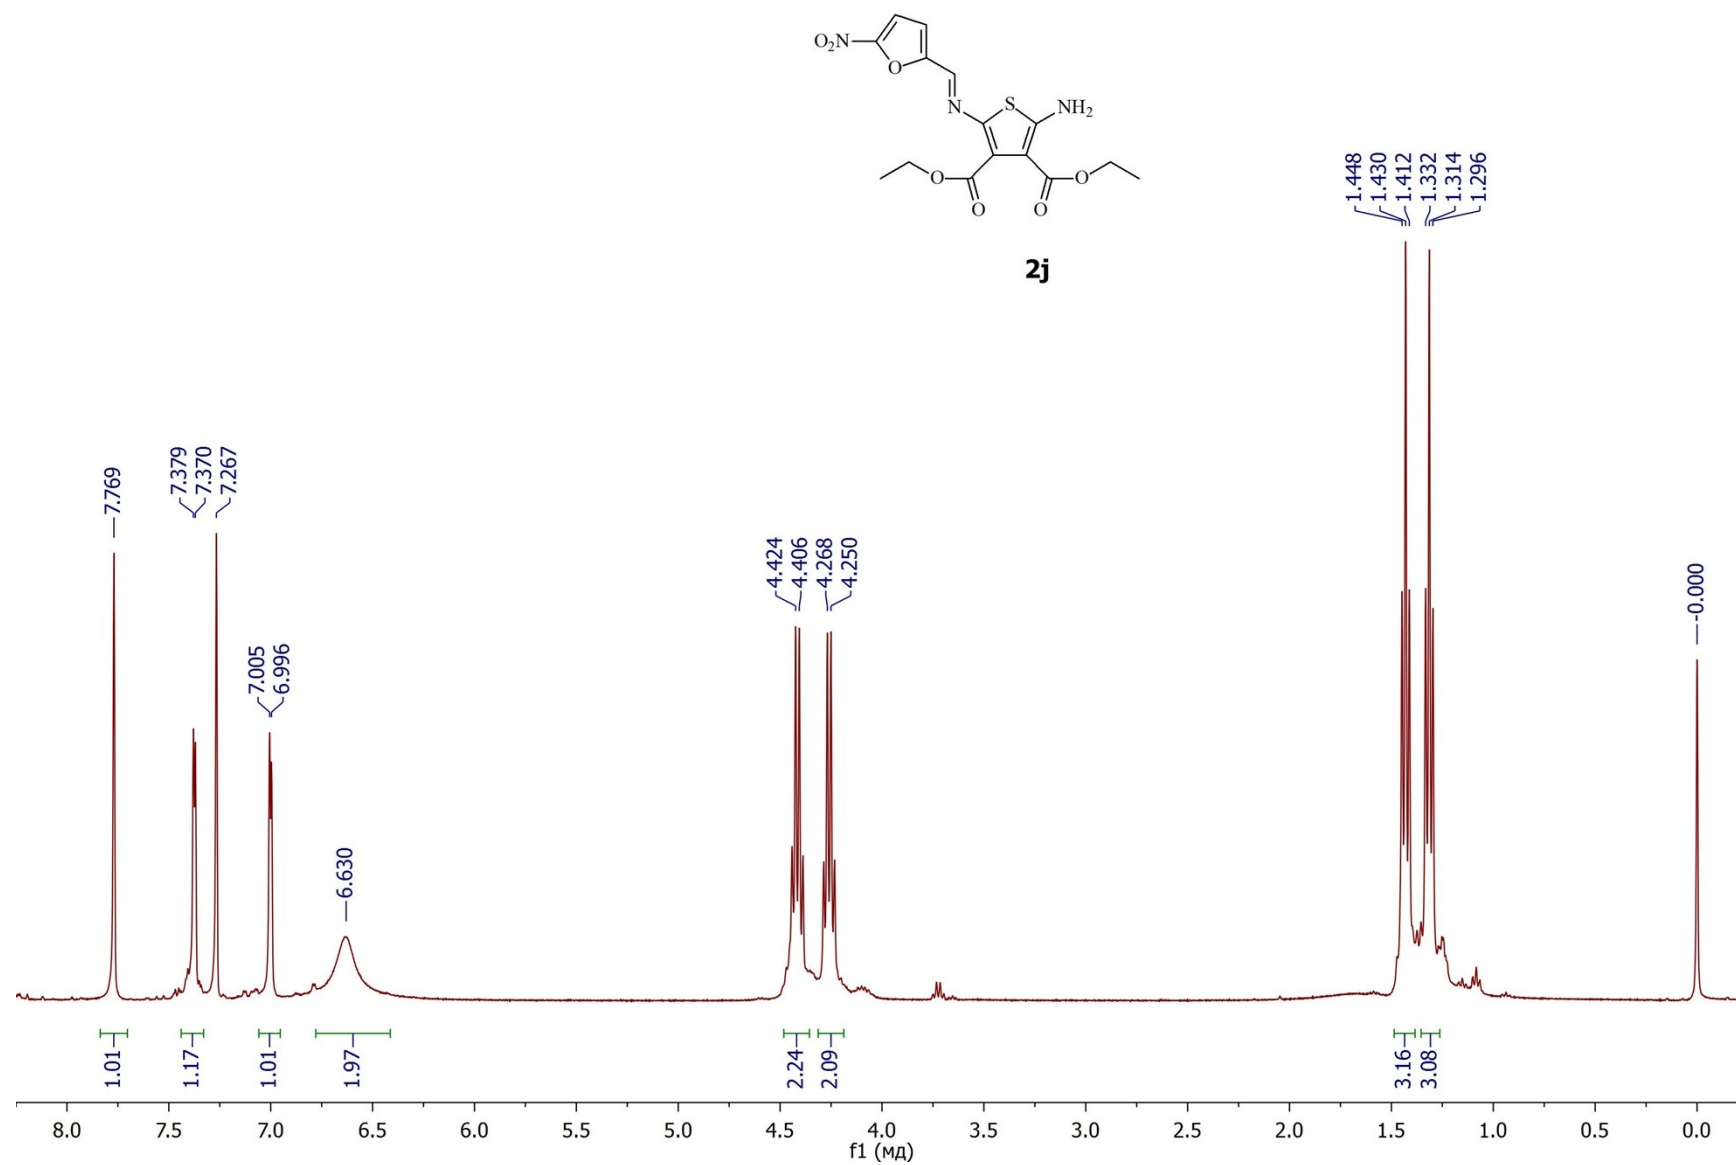

Figure SM-1. <sup>1</sup>H NMR spectrum of 2j

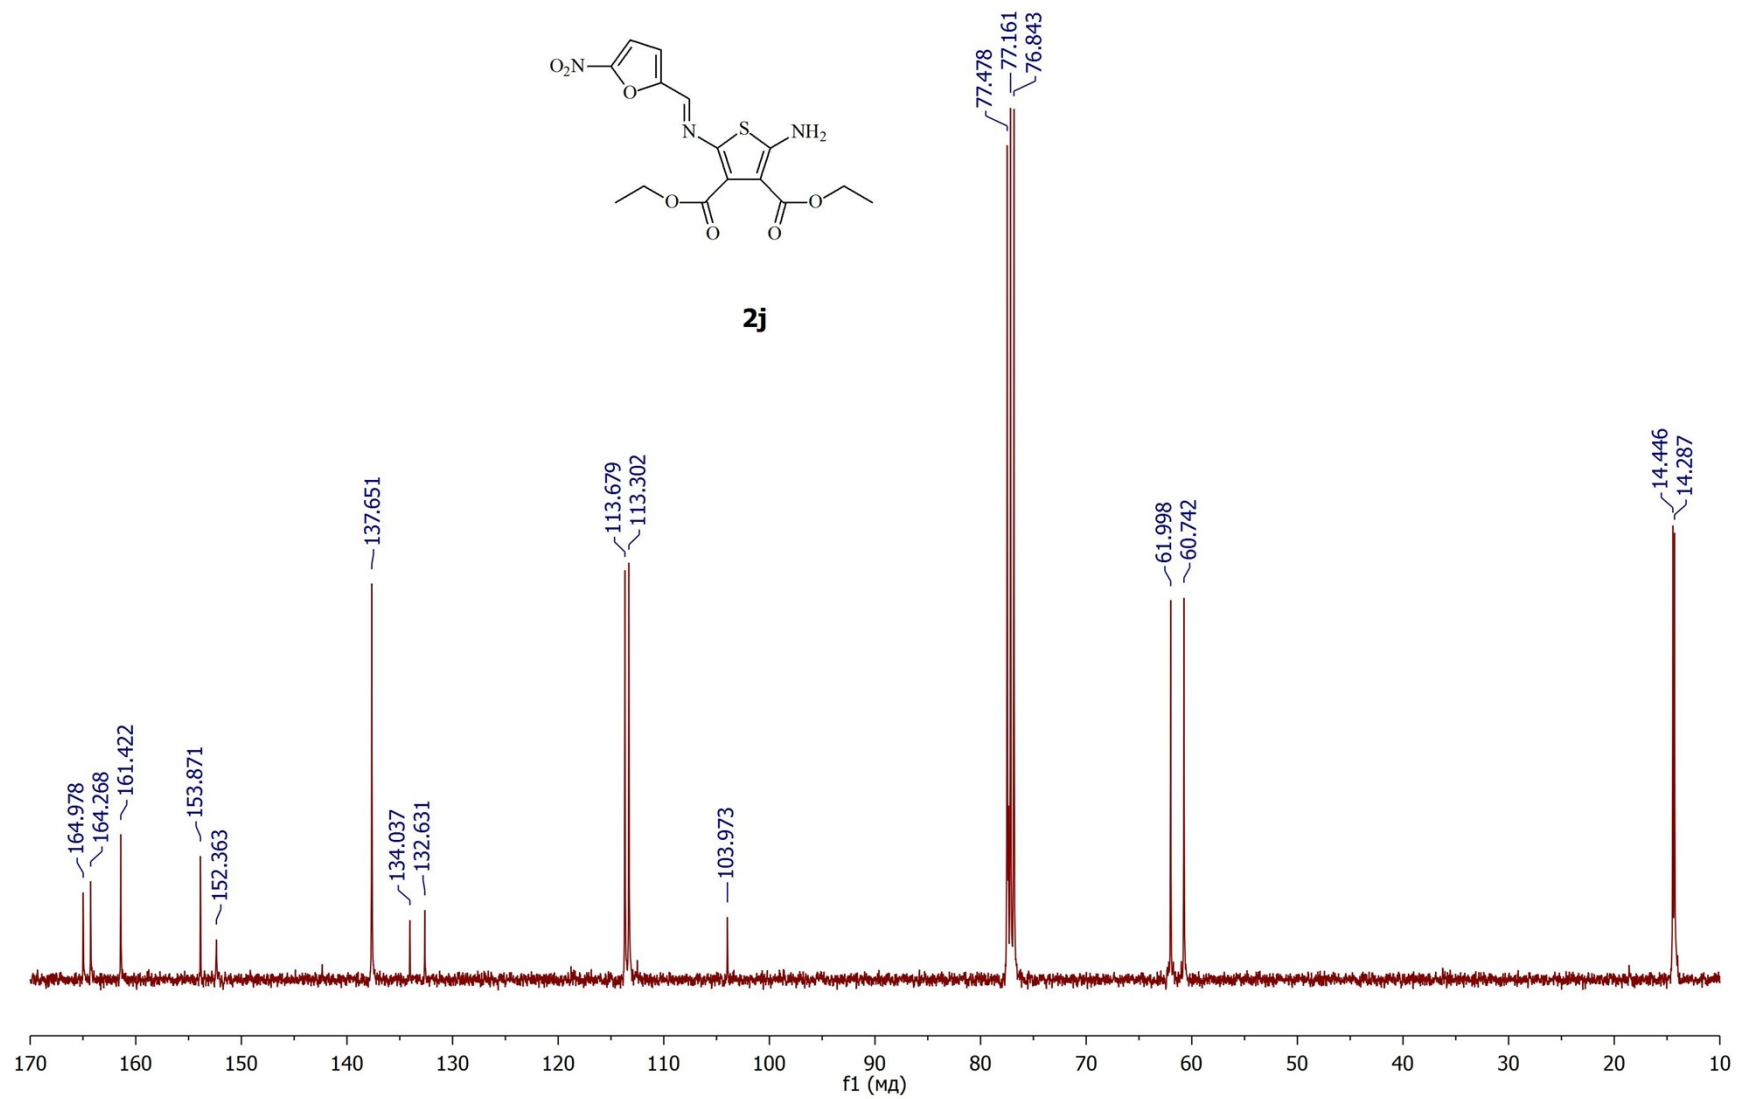

Figure SM-2.  $^{13}\text{C}$  NMR spectrum of 2j

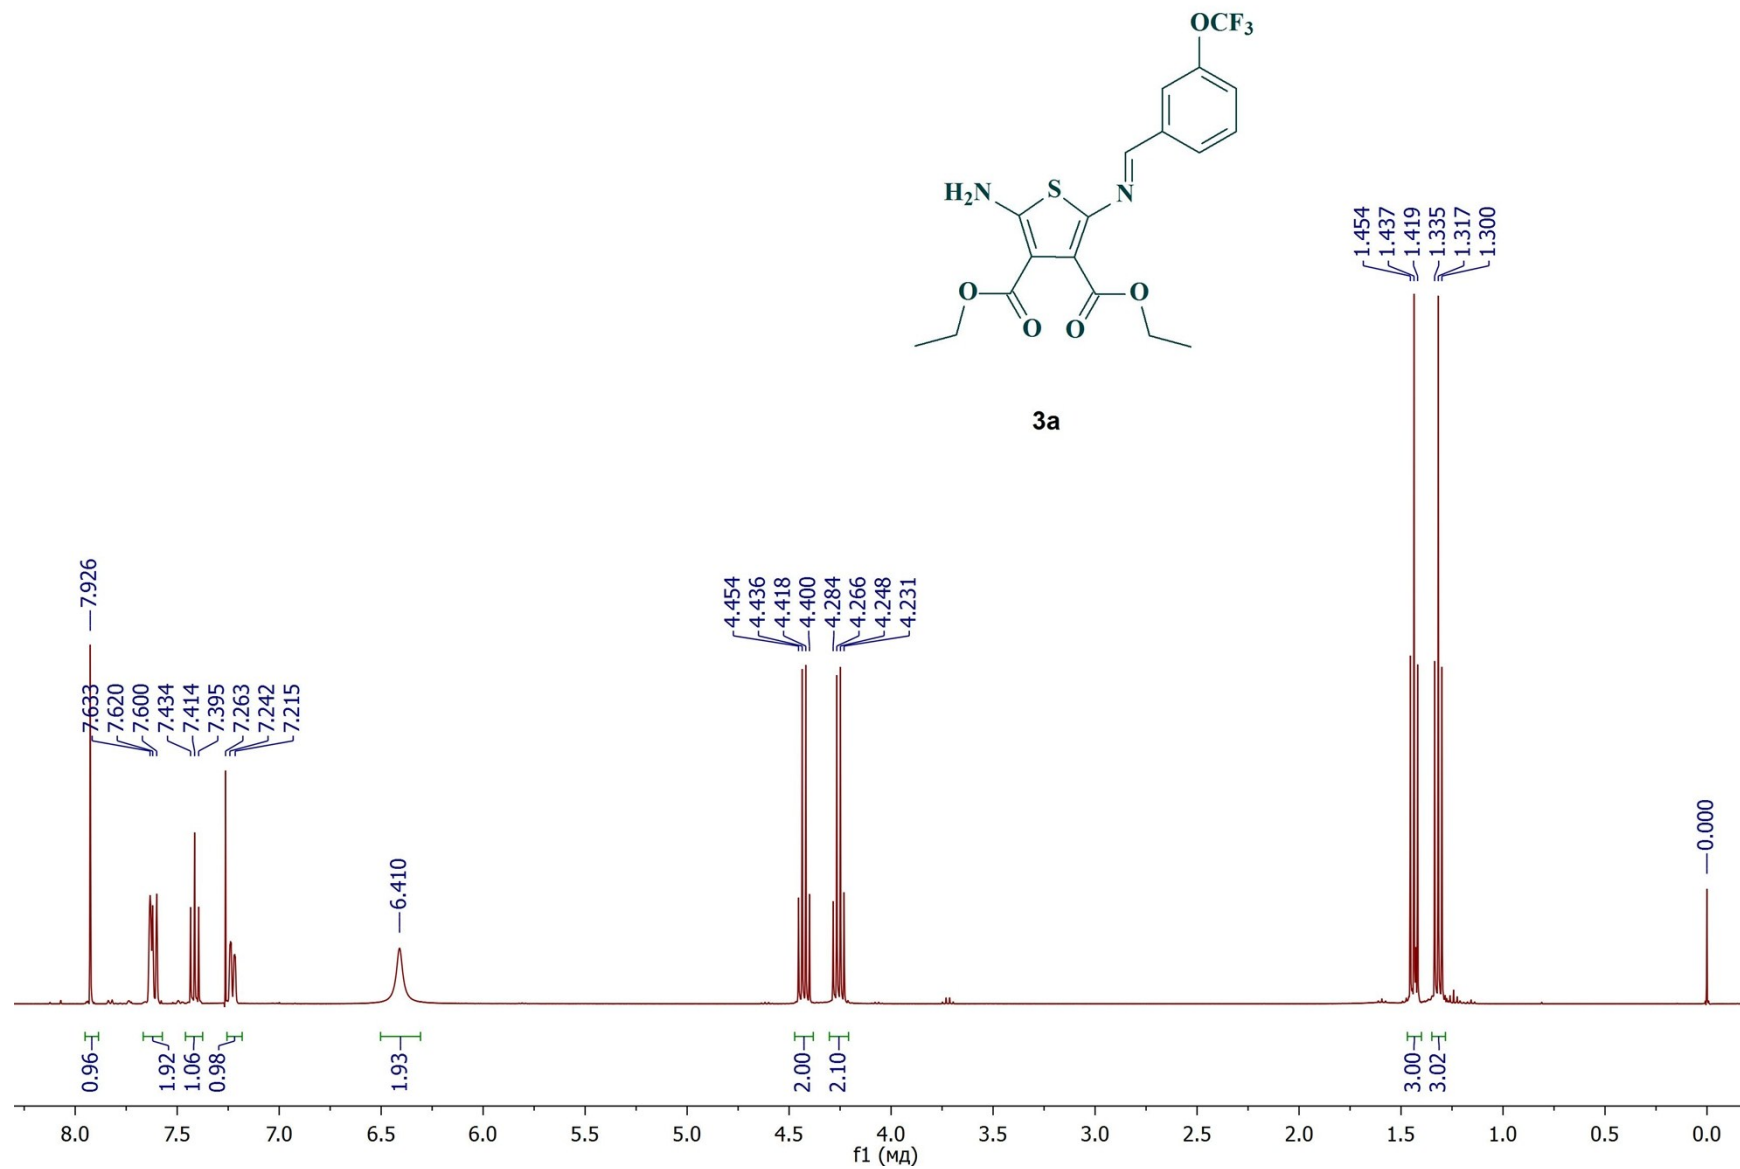

Figure SM-3.  $^1\text{H}$  NMR spectrum of 3a



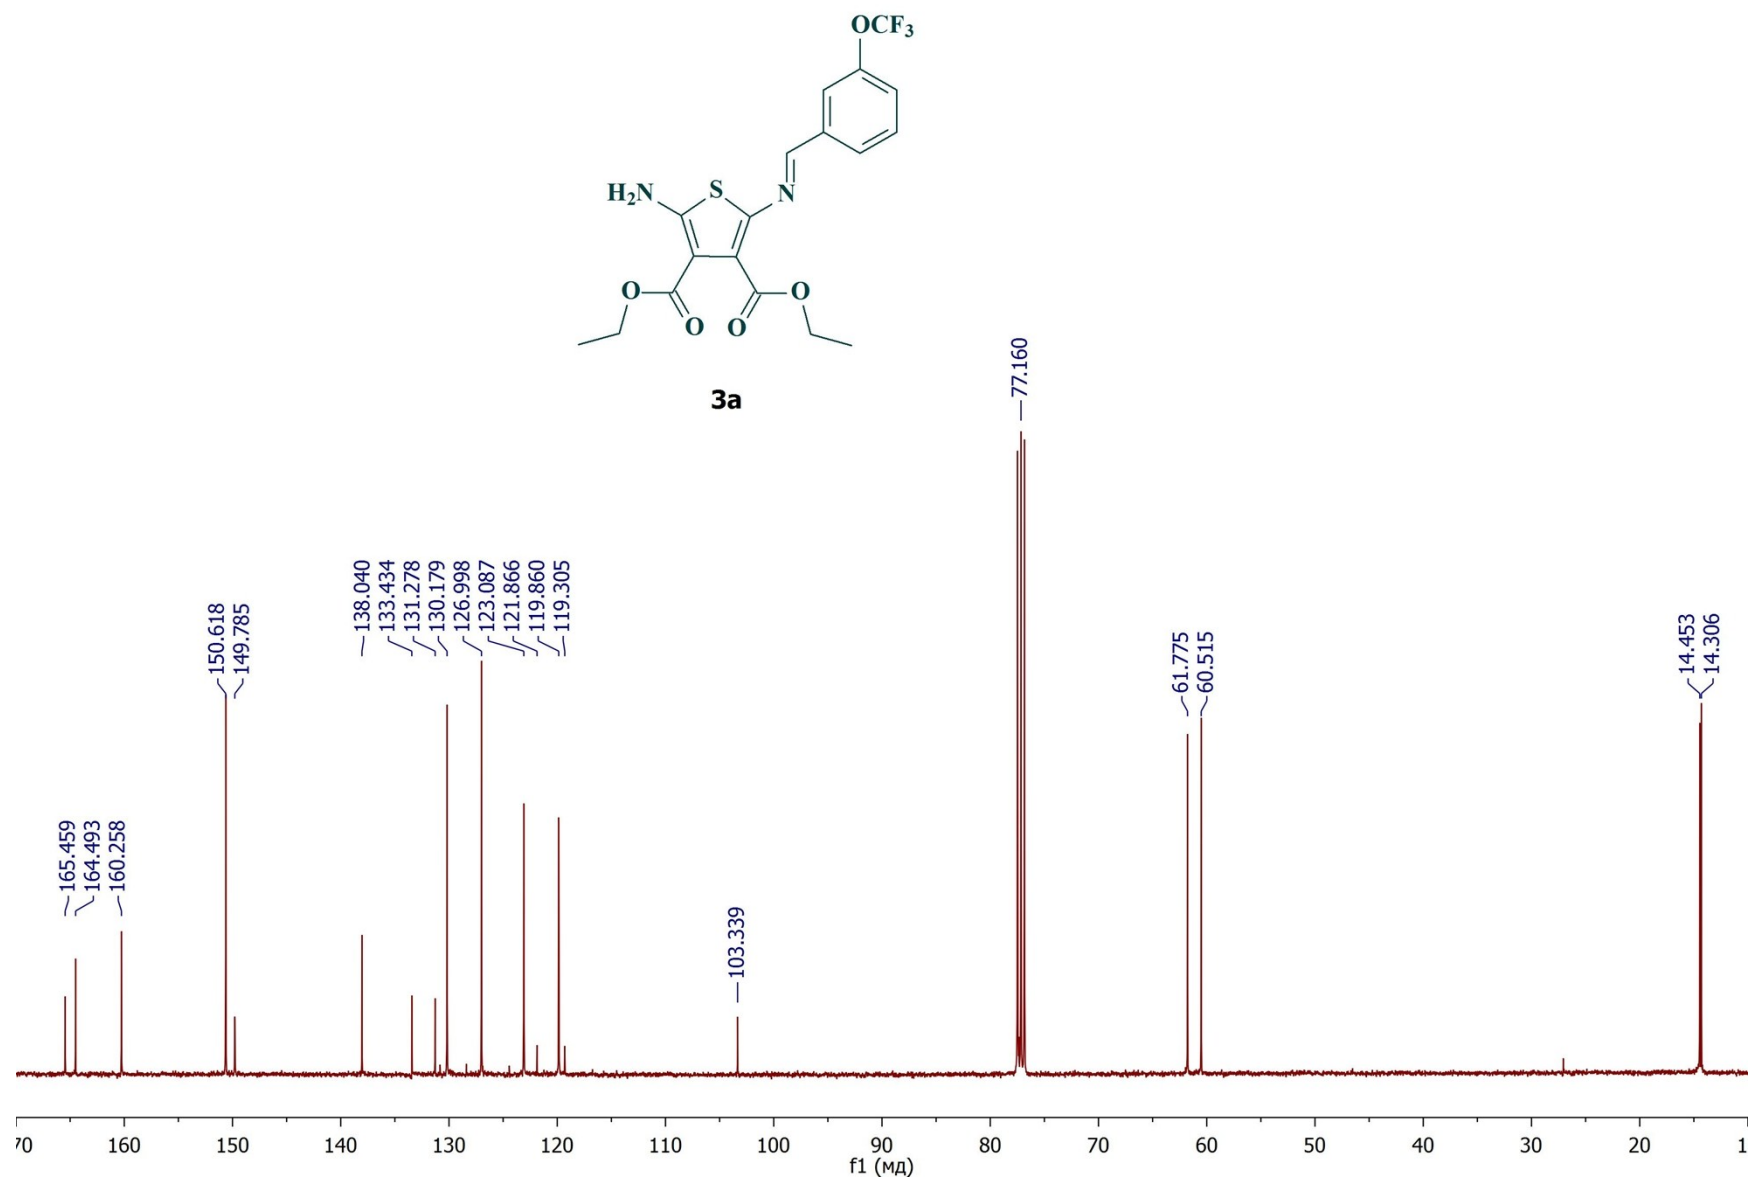

Figure SM-4.  $^{13}\text{C}$  NMR spectrum of 3a

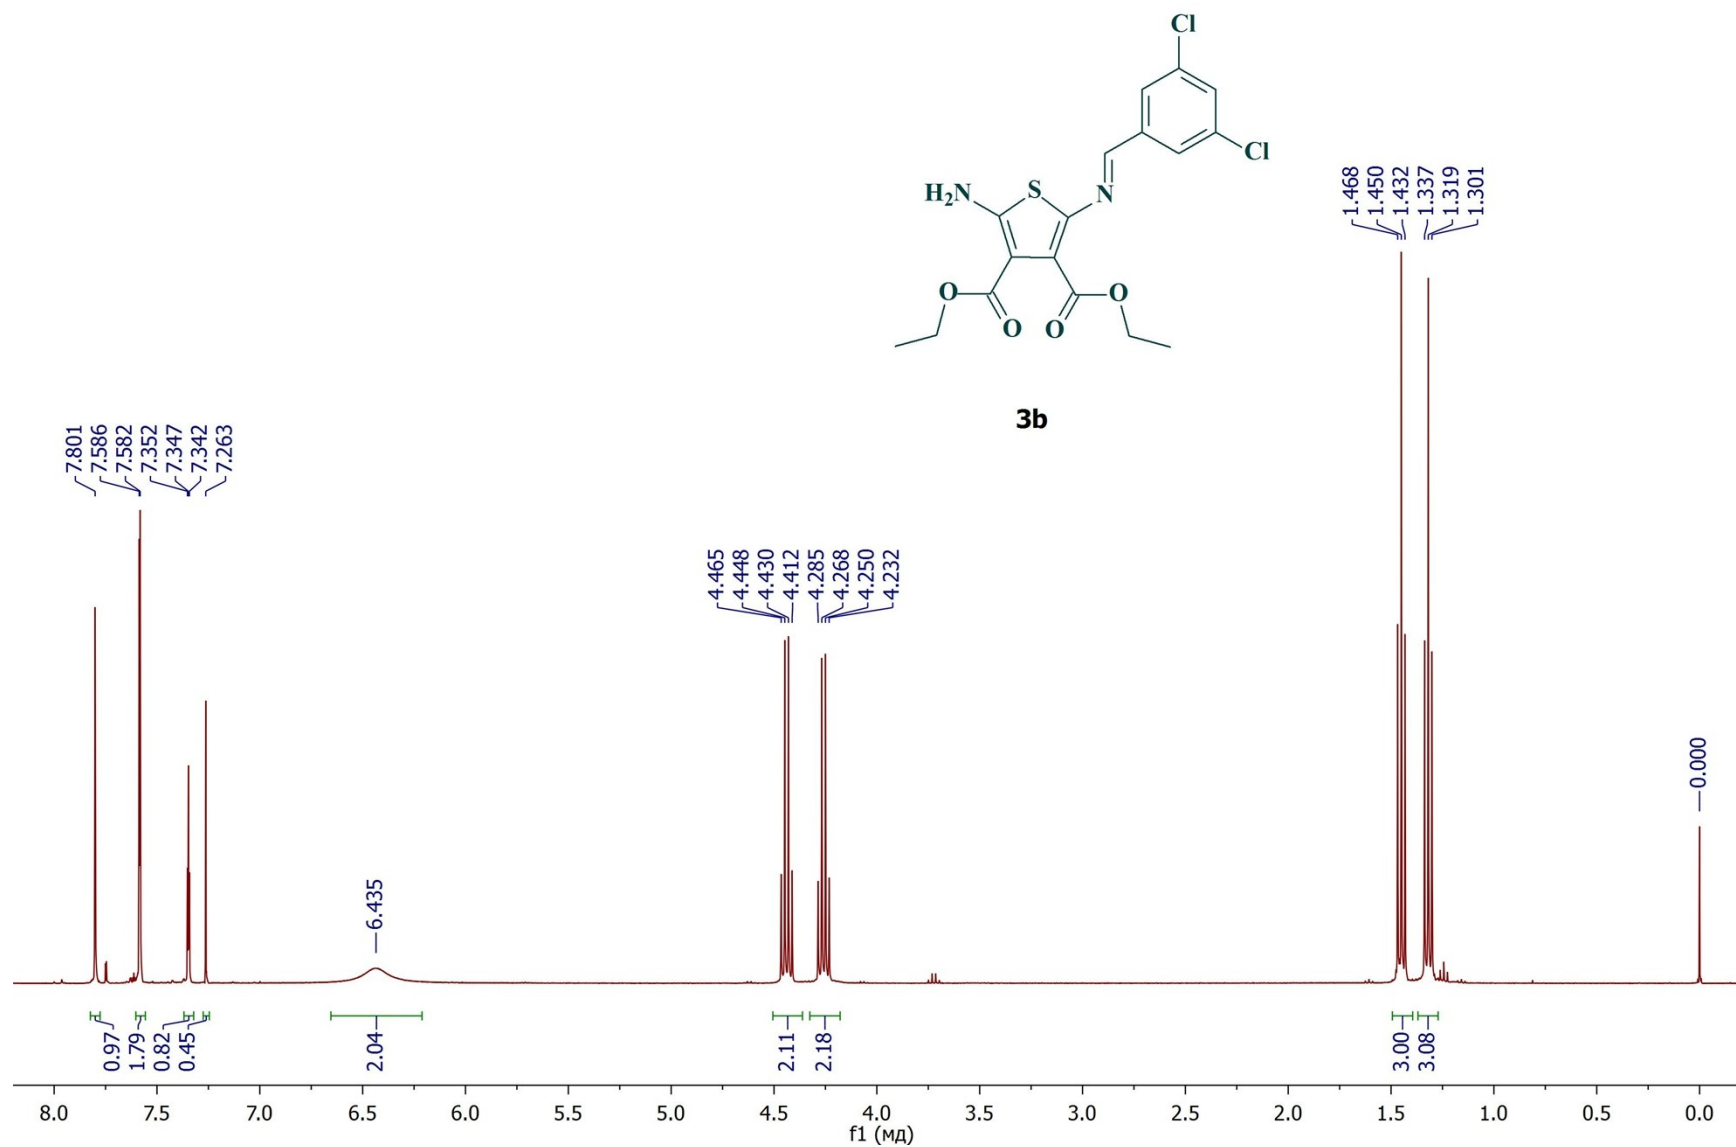

Figure SM-5. <sup>1</sup>H NMR spectrum of **3b**

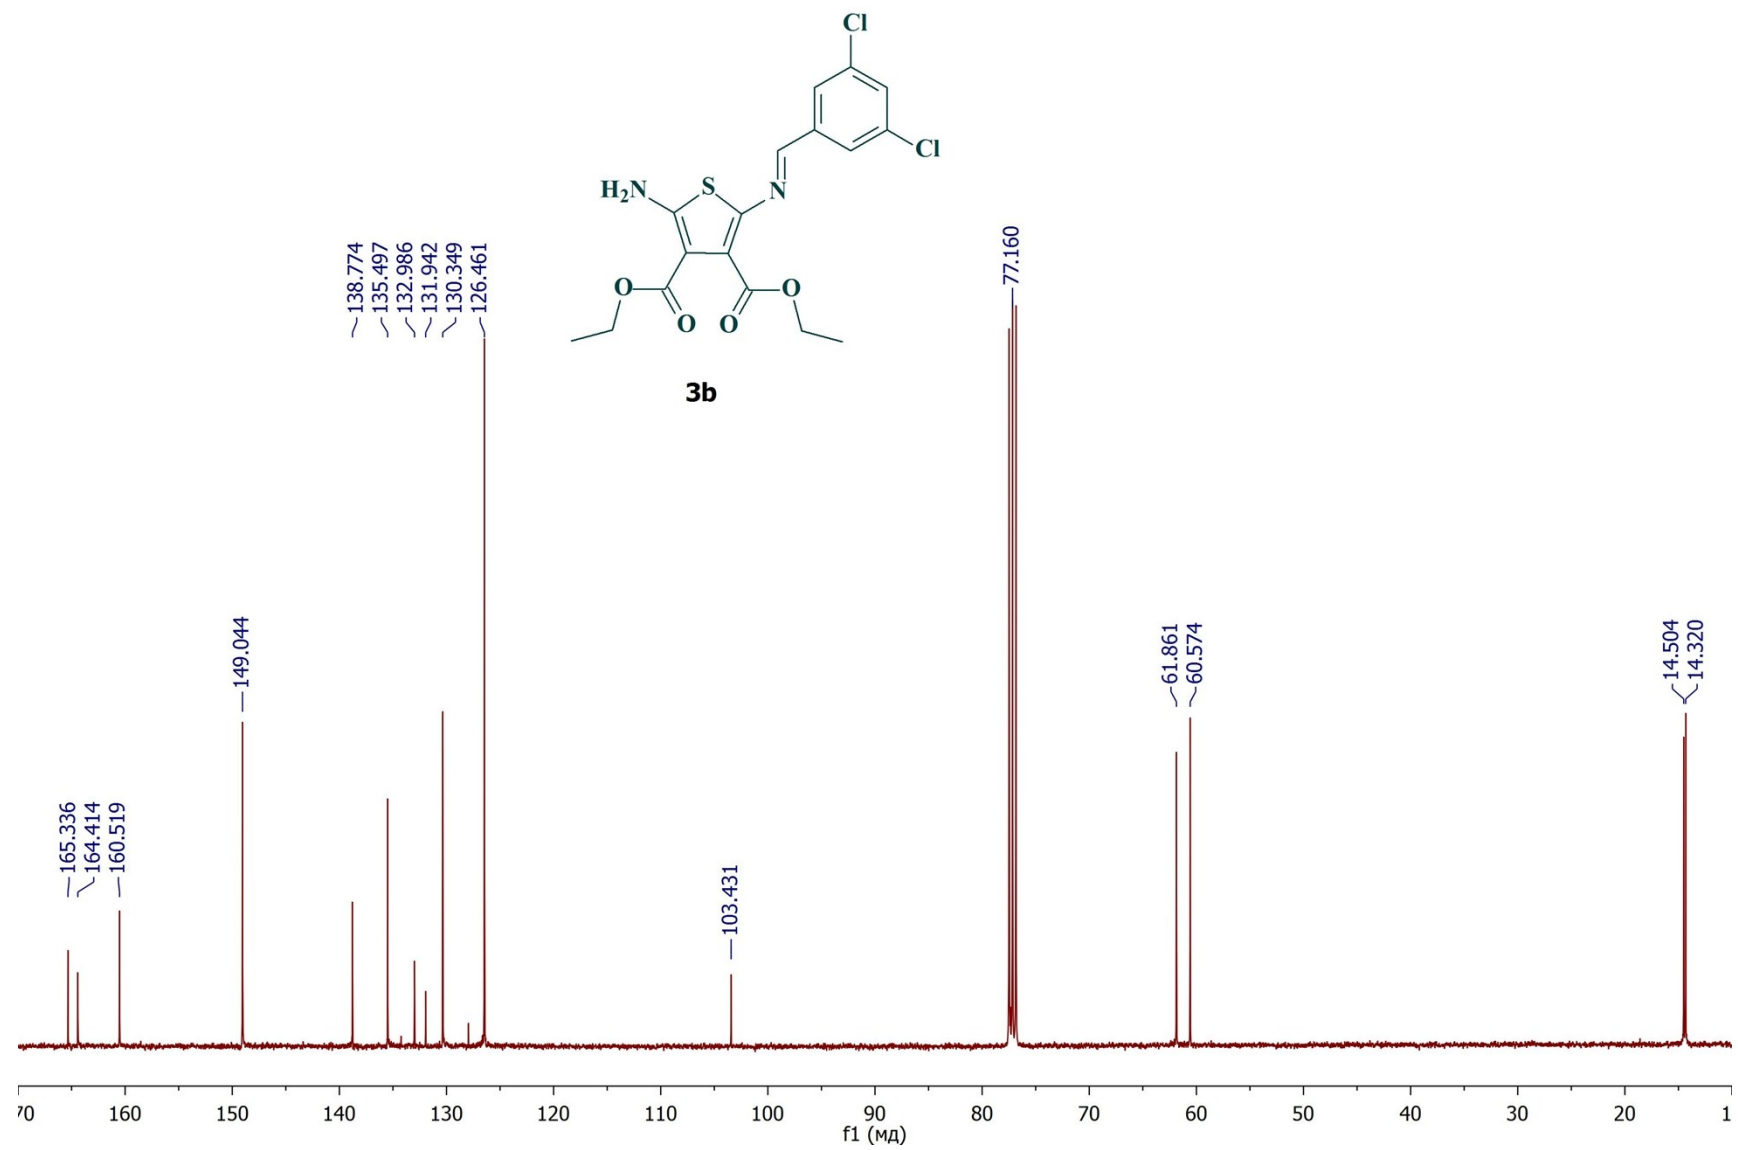

Figure SM-6.  $^{13}\text{C}$  NMR spectrum of **3b**

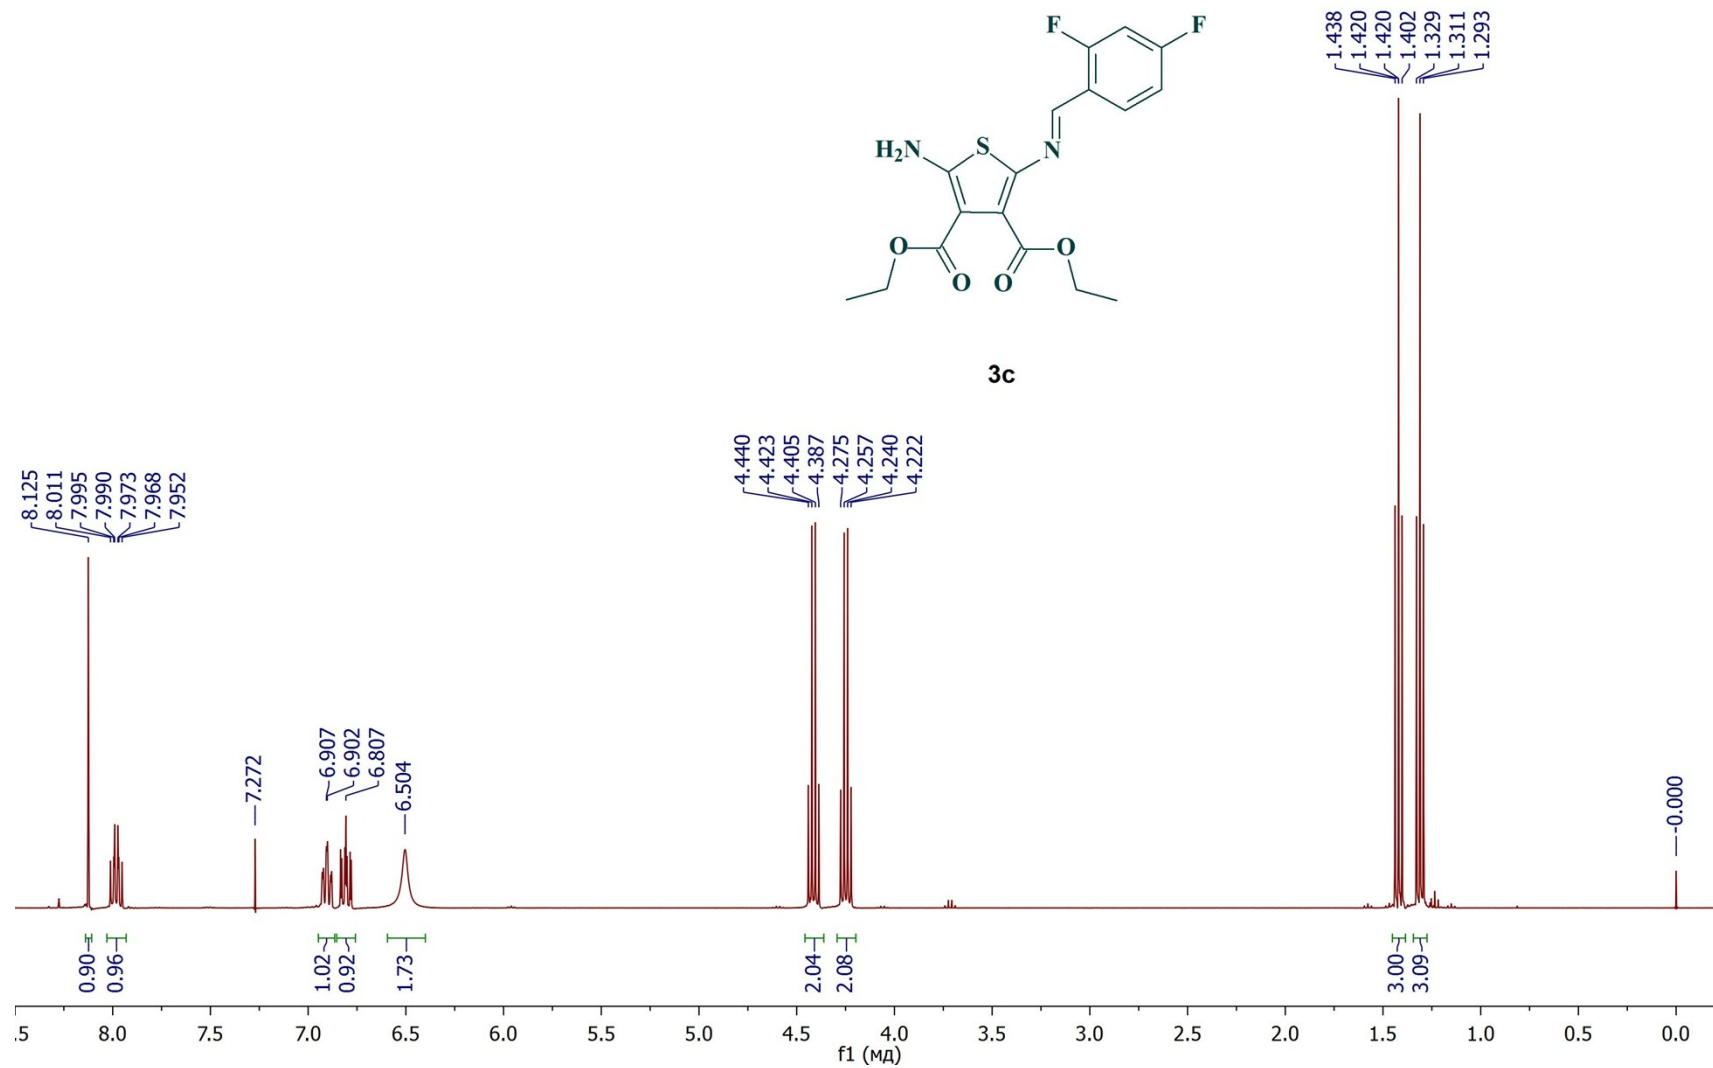

Figure SM-7. <sup>1</sup>H NMR spectrum of 3c

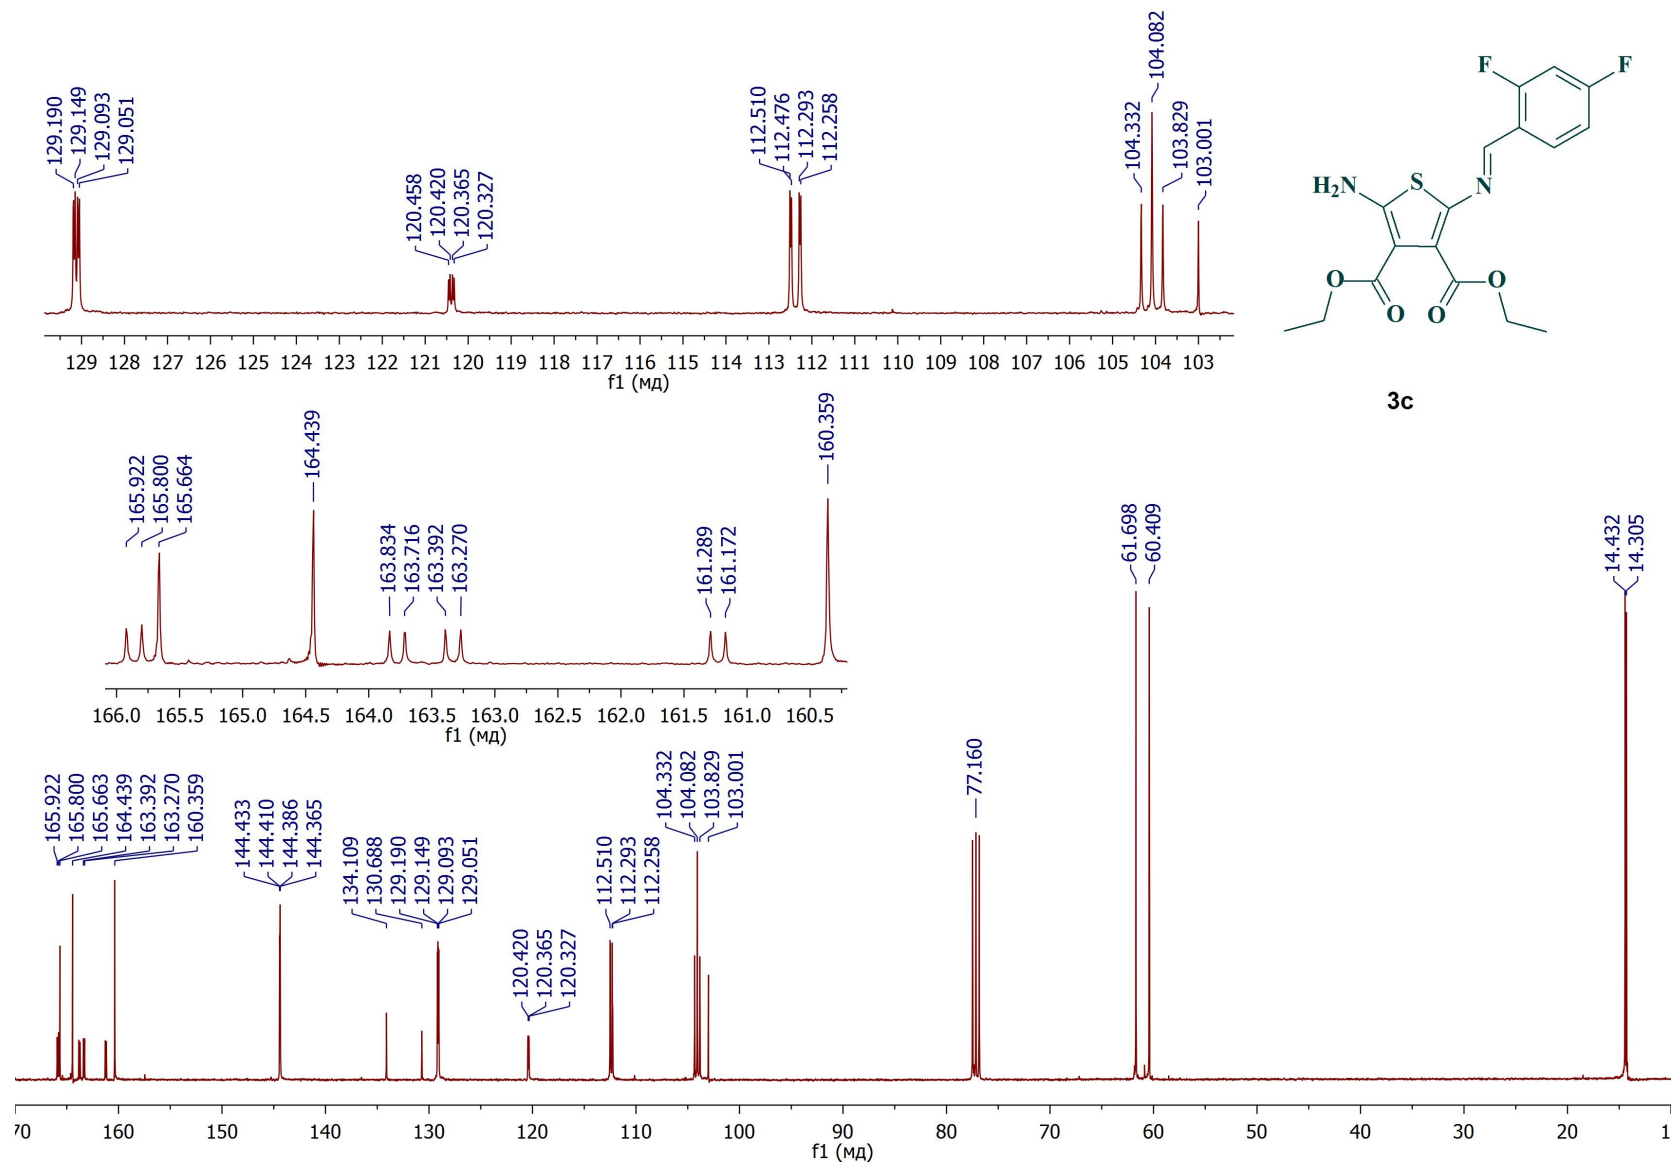

Figure SM-8.  $^{13}\text{C}$  NMR spectrum of **3c**

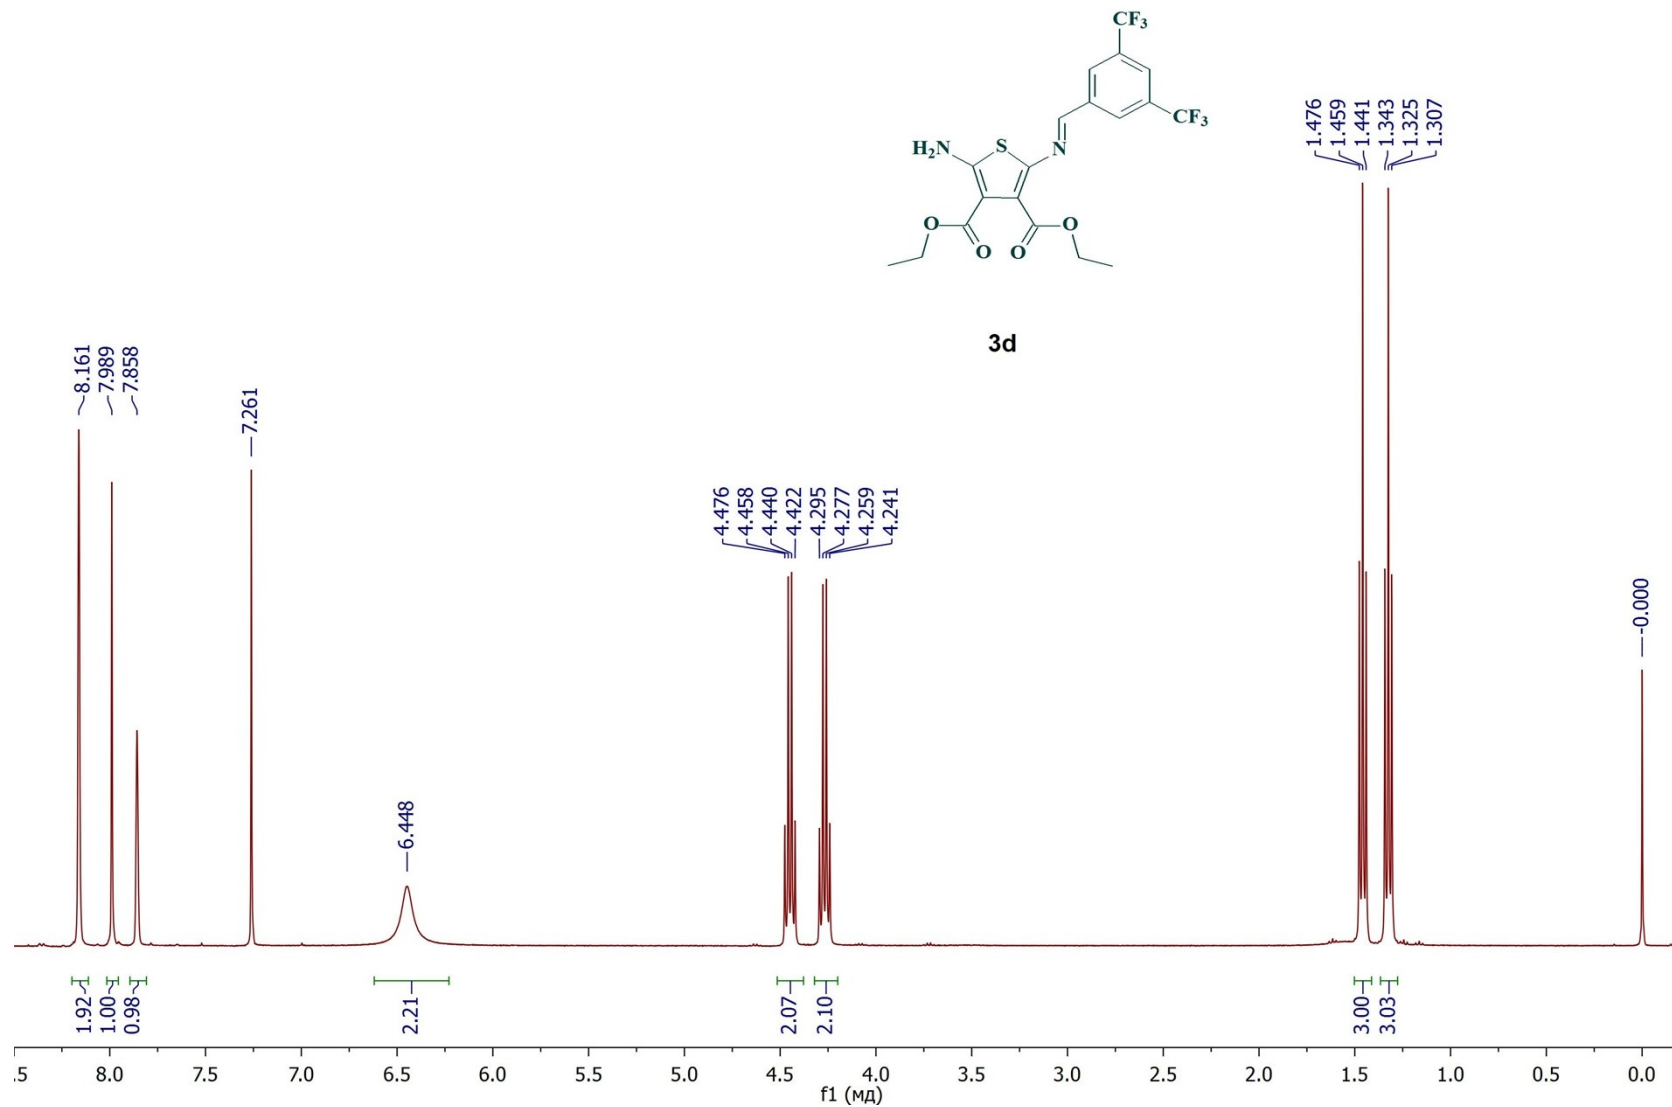

**Figure SM-9.**  $^1\text{H}$  NMR spectrum of **3d**

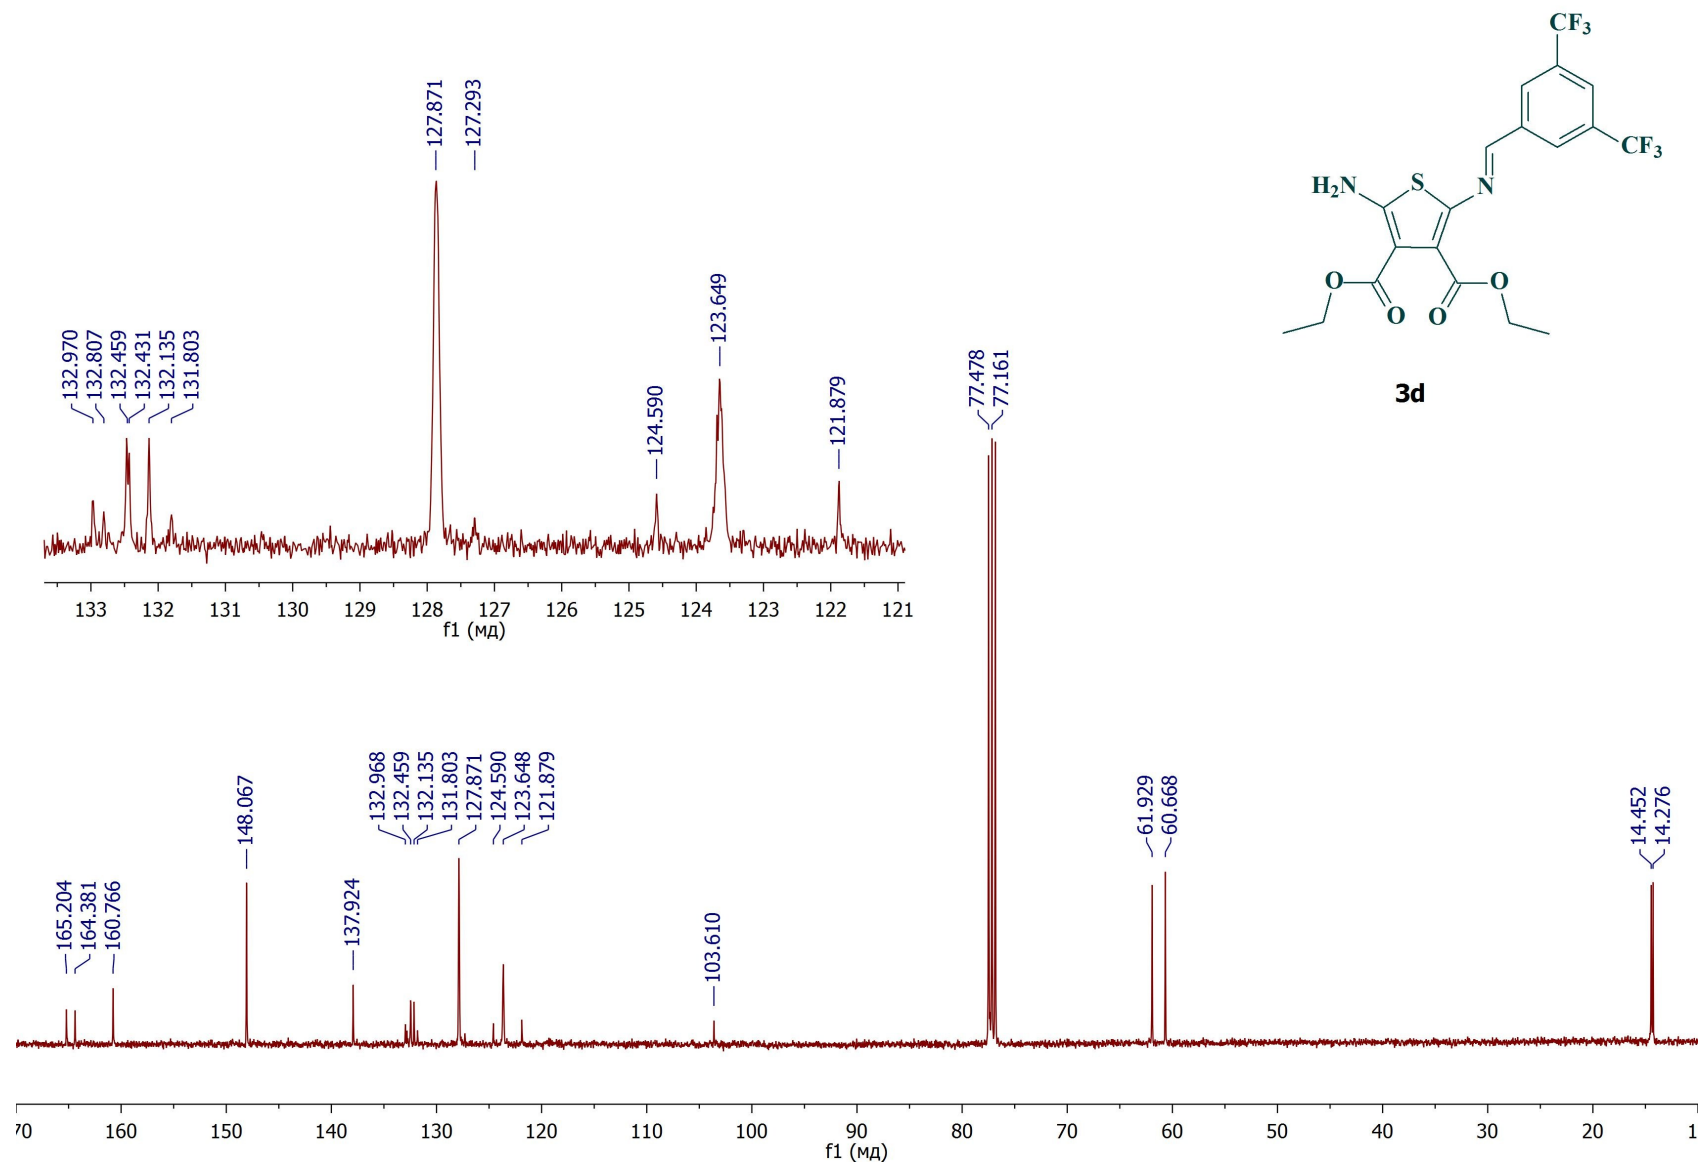

Figure SM-10.  $^{13}\text{C}$  NMR spectrum of **3d**

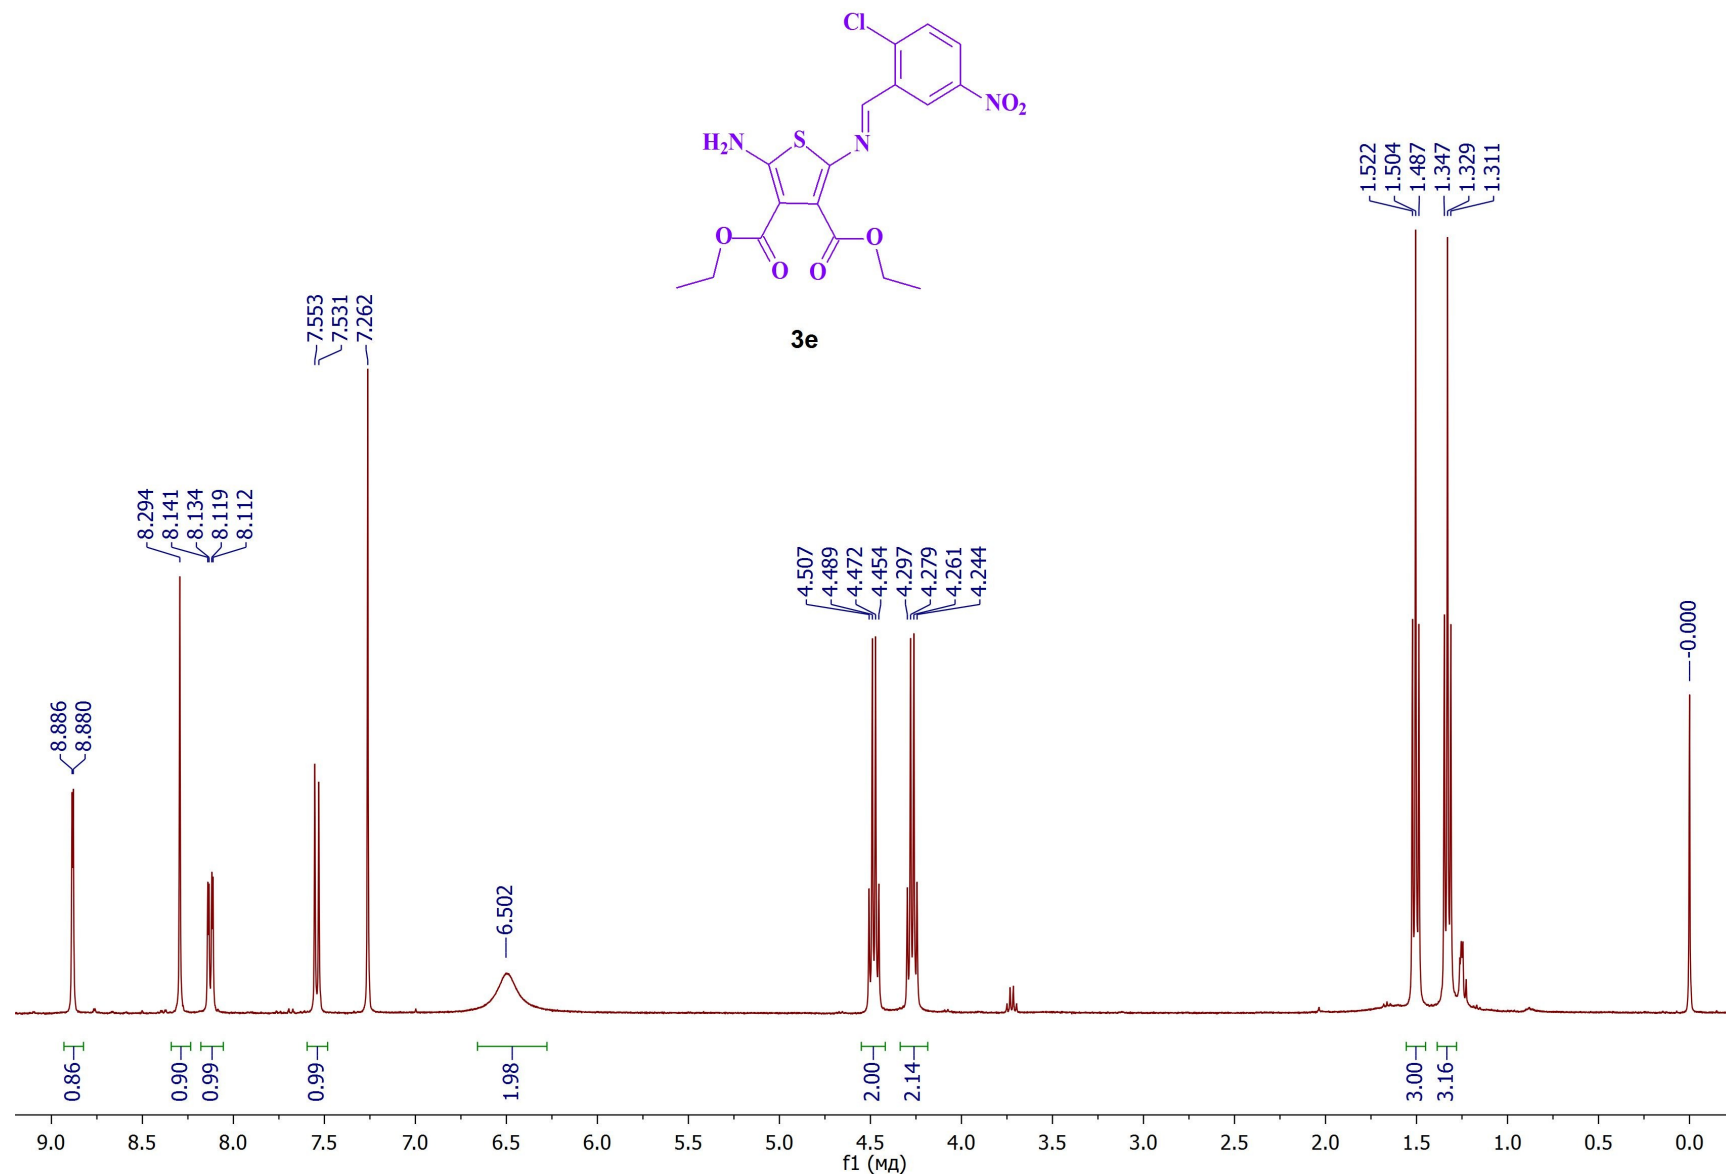

Figure SM-11.  $^1\text{H}$  NMR spectrum of 3e



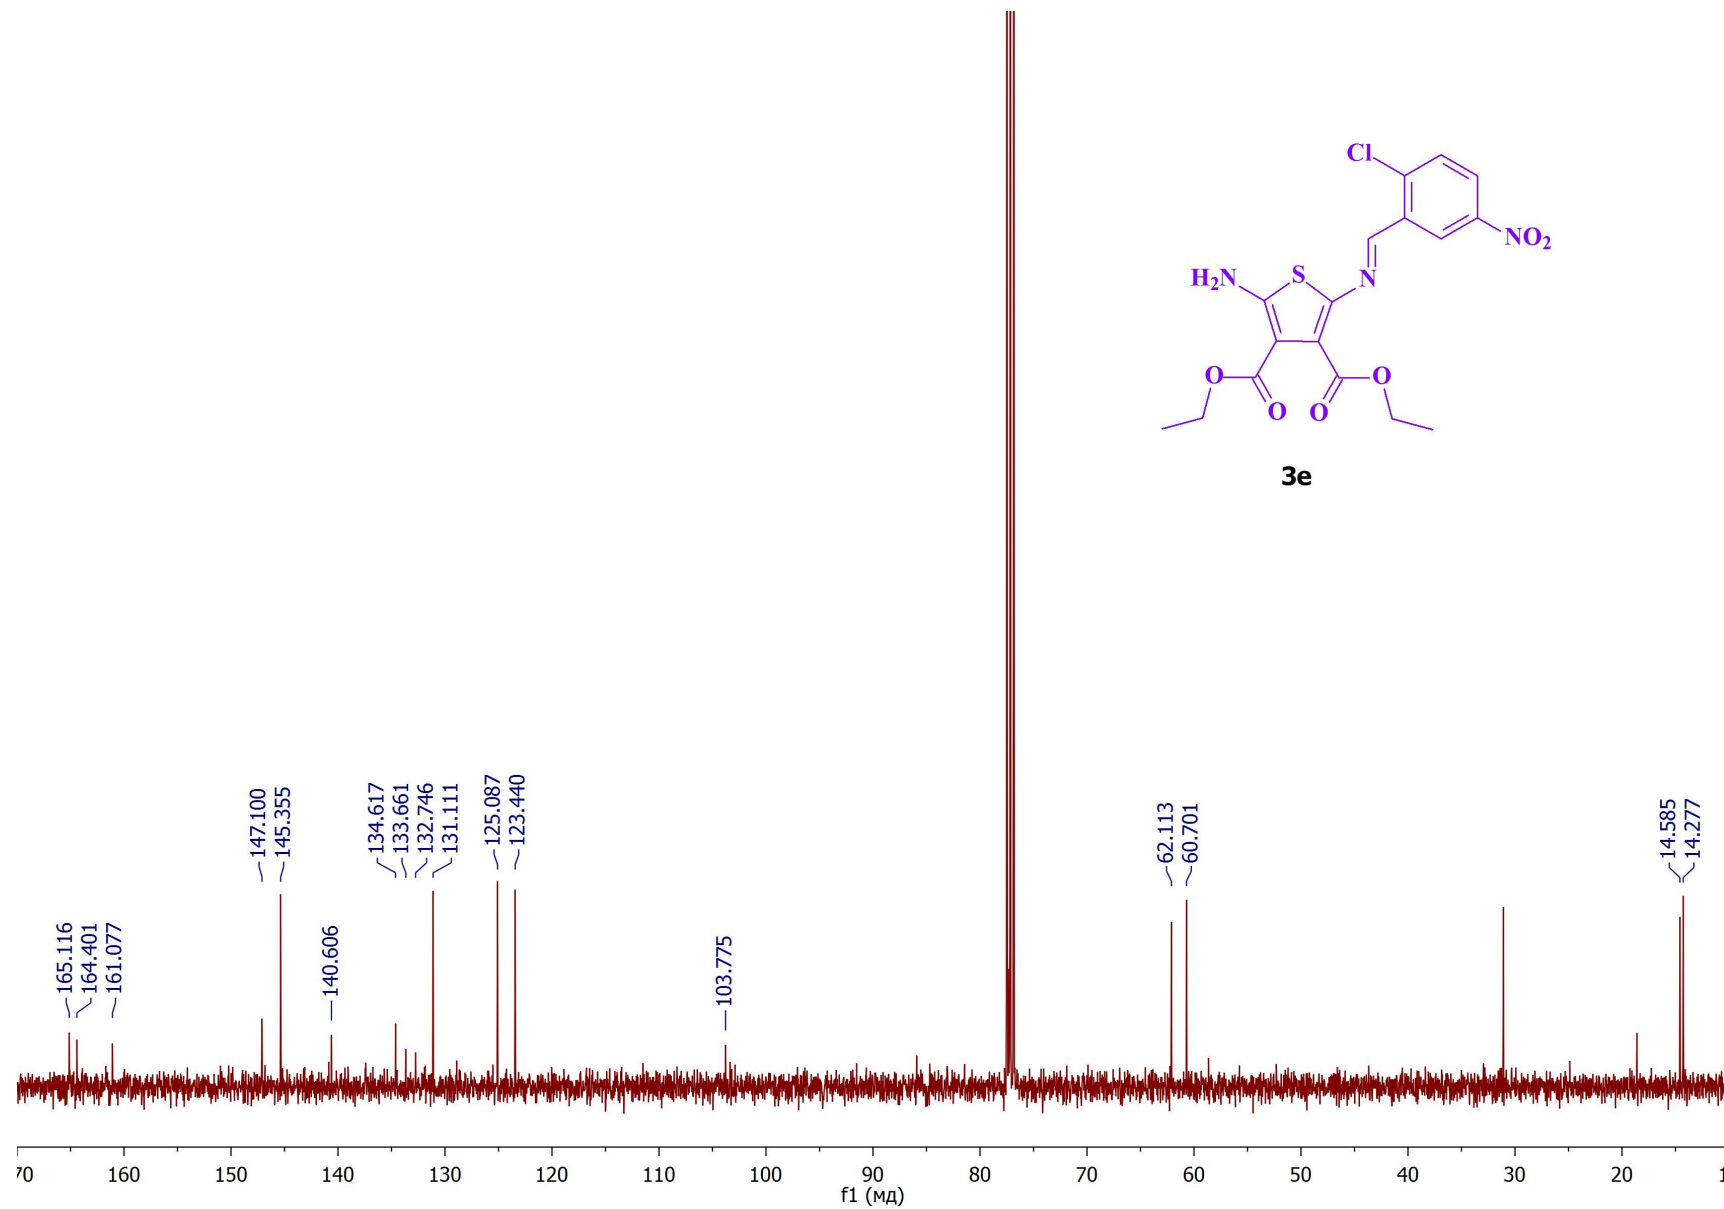

Figure SM-12.  $^{13}\text{C}$  NMR spectrum of **3e**

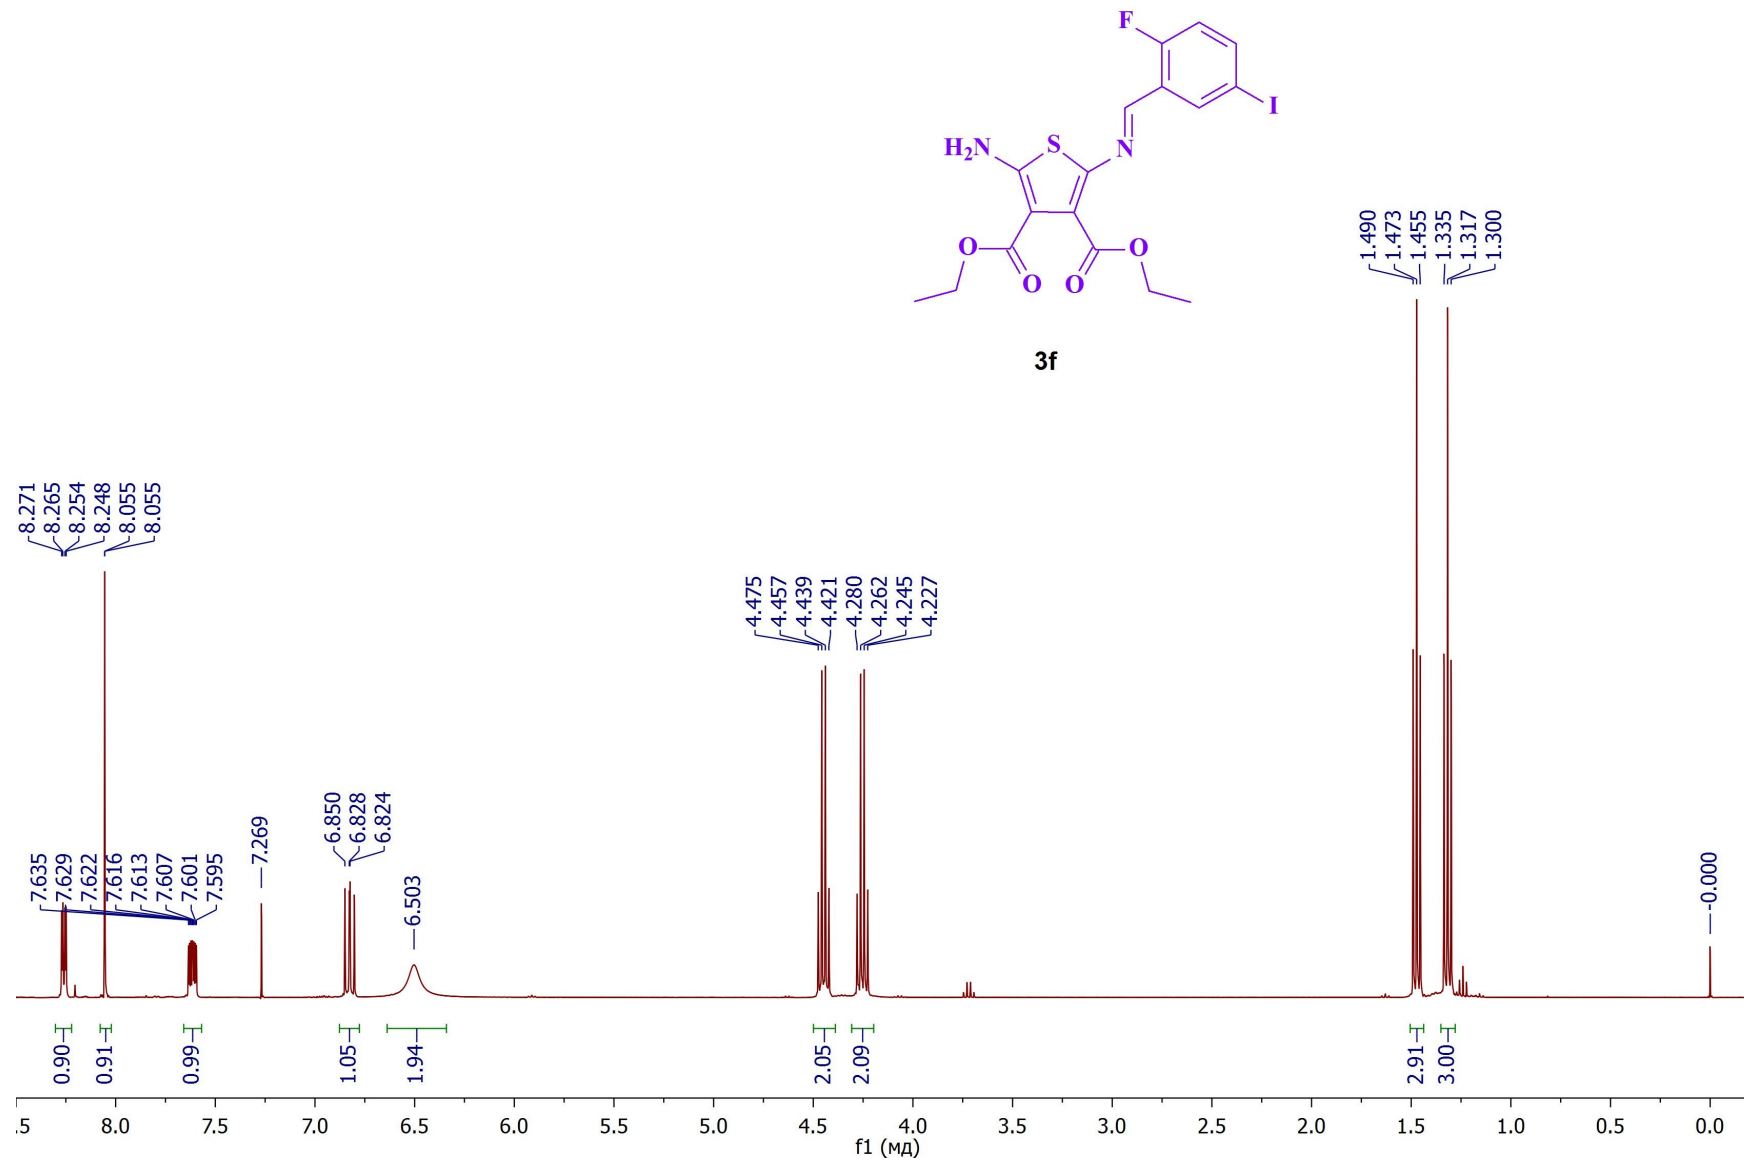

**Figure SM-13.**  $^1\text{H}$  NMR spectrum of **3f**

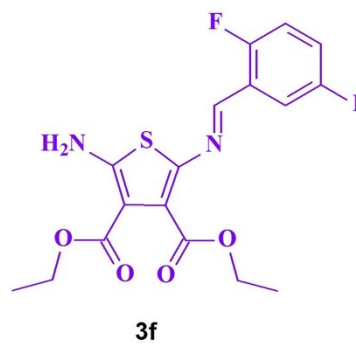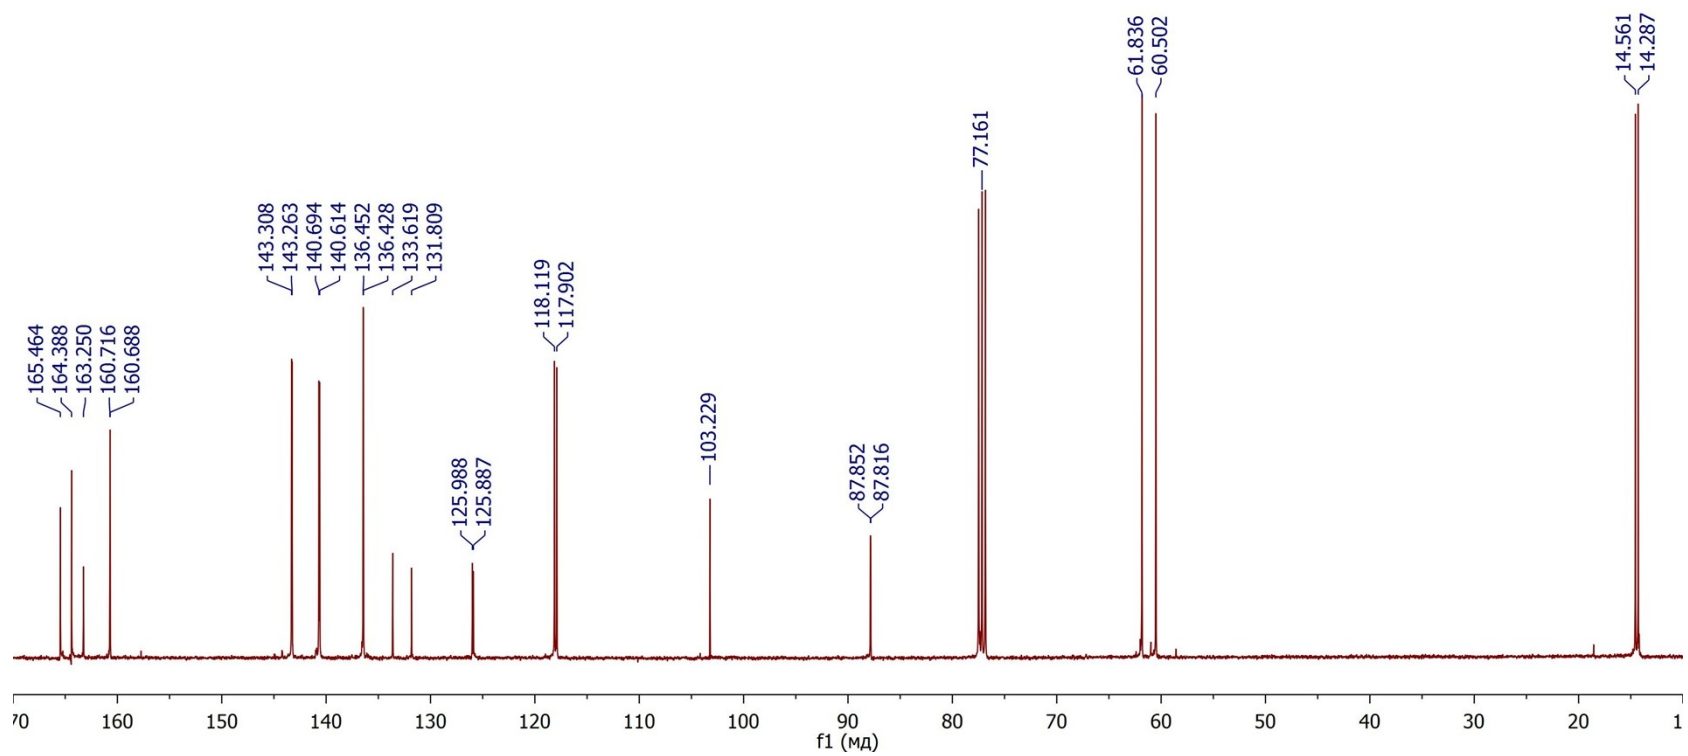

Figure SM-14.  $^{13}\text{C}$  NMR spectrum of **3f**

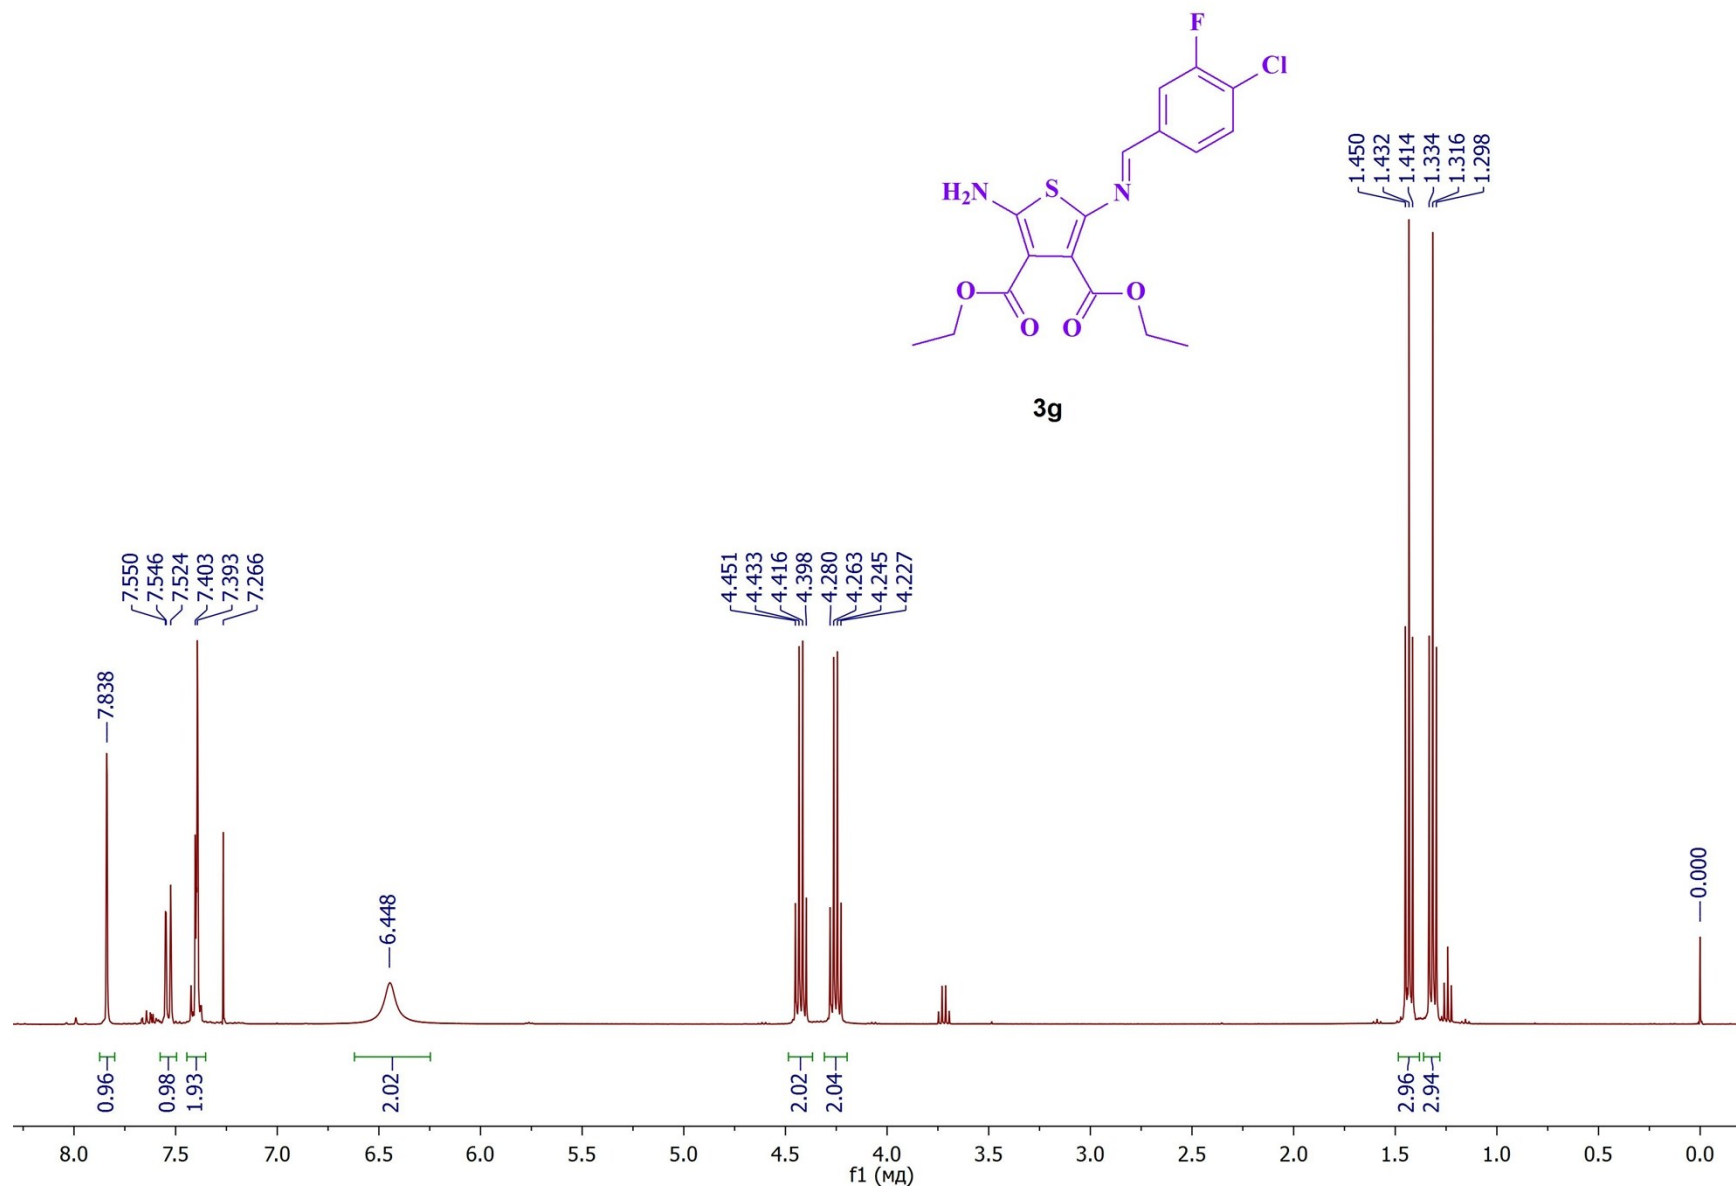

Figure SM-15.  $^1\text{H}$  NMR spectrum of 3g

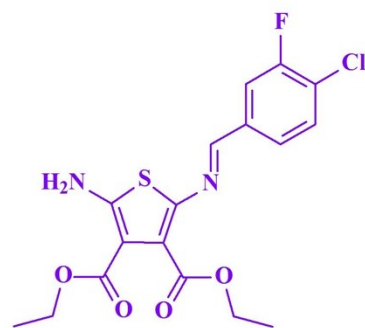**3g**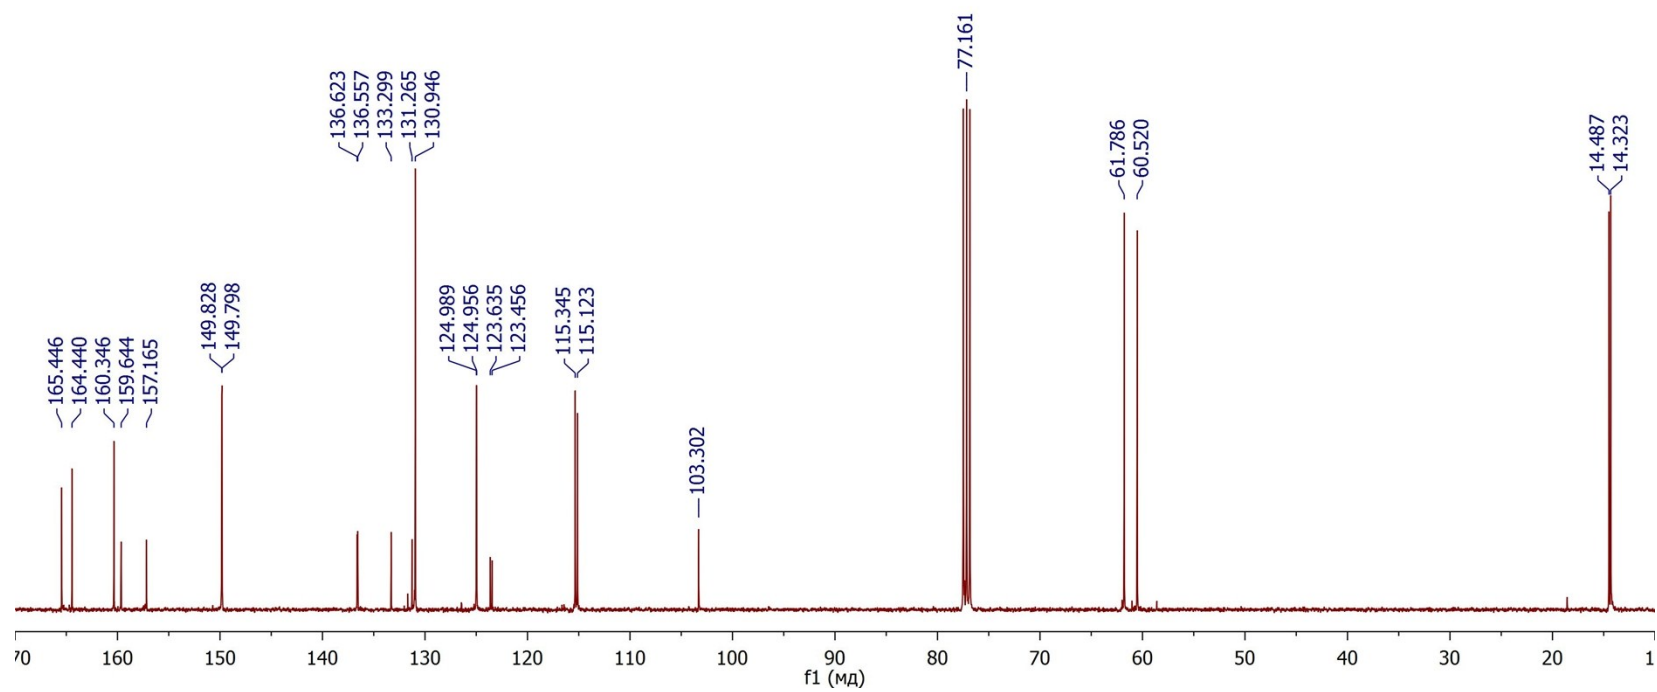**Figure SM-16.** <sup>13</sup>C NMR spectrum of 3g

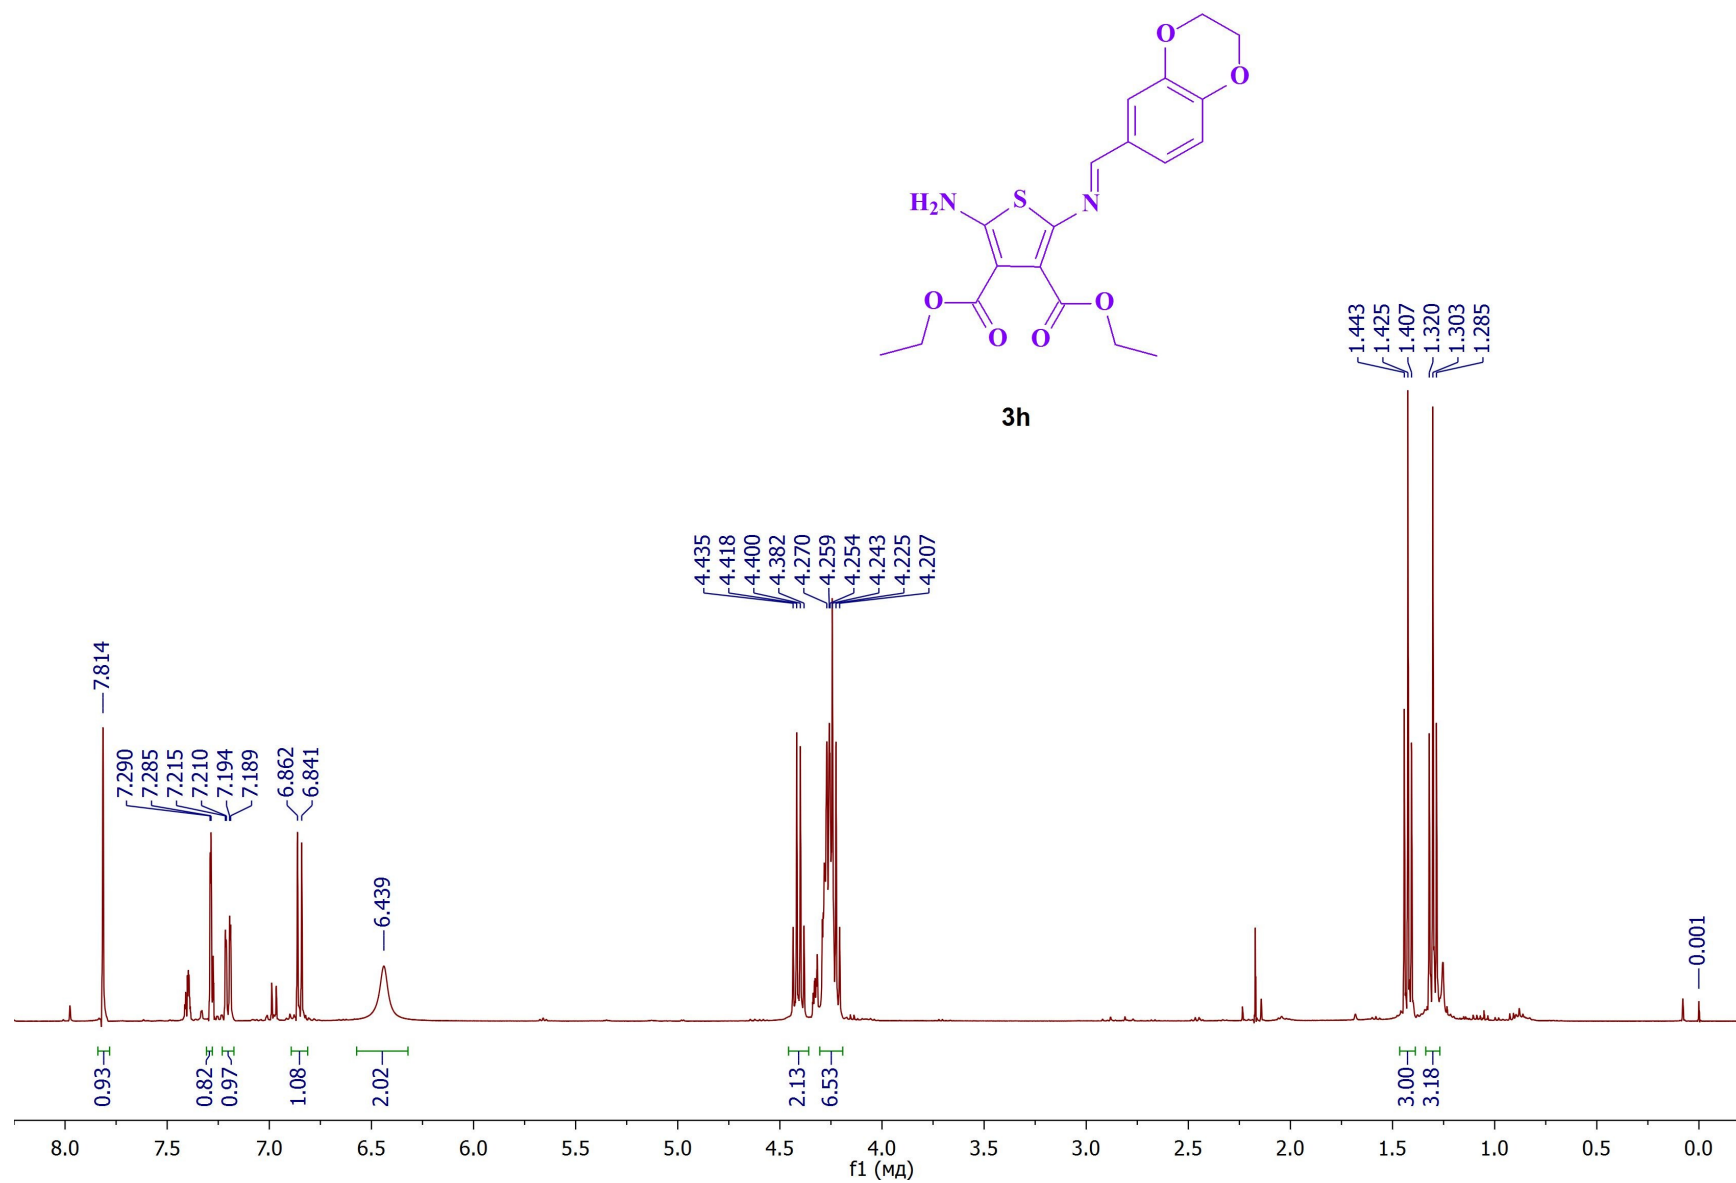Figure SM-17. <sup>1</sup>H NMR spectrum of 3h

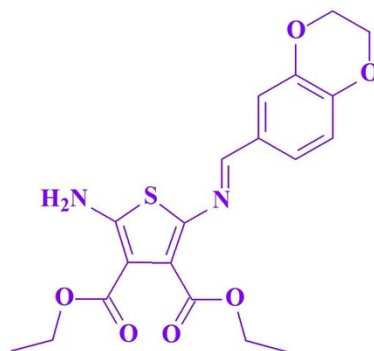

3h

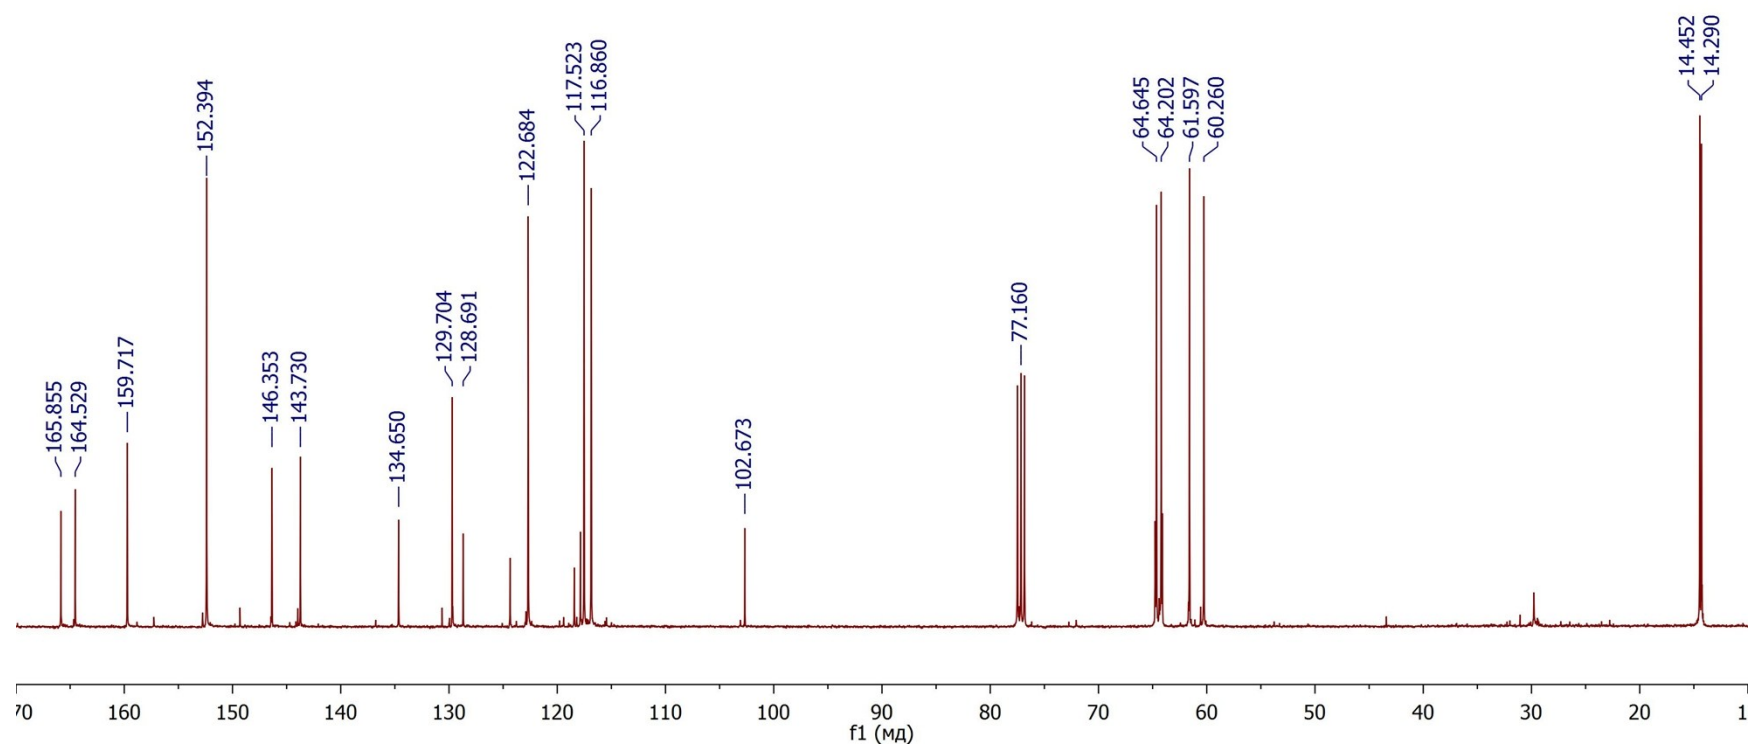Figure SM-18. <sup>13</sup>C NMR spectrum of 3h

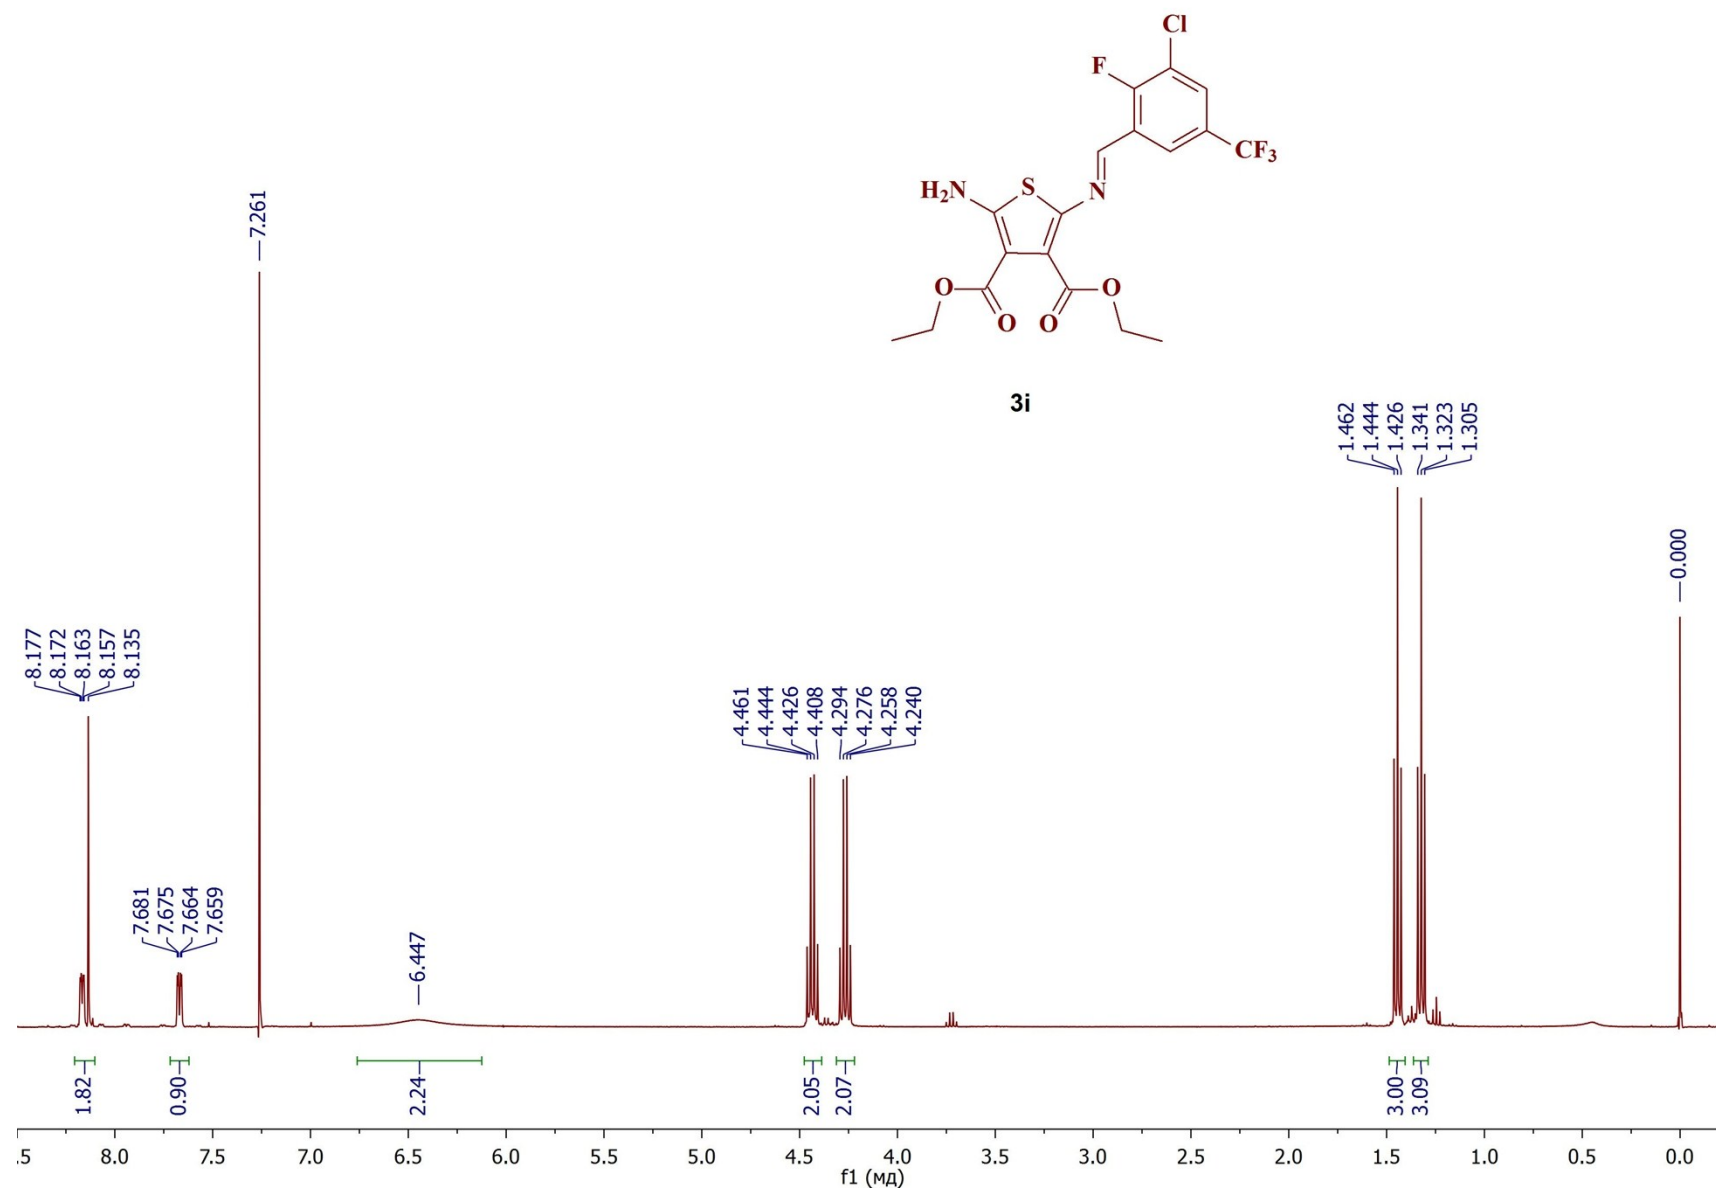

Figure SM-19.  $^1\text{H}$  NMR spectrum of **3i**



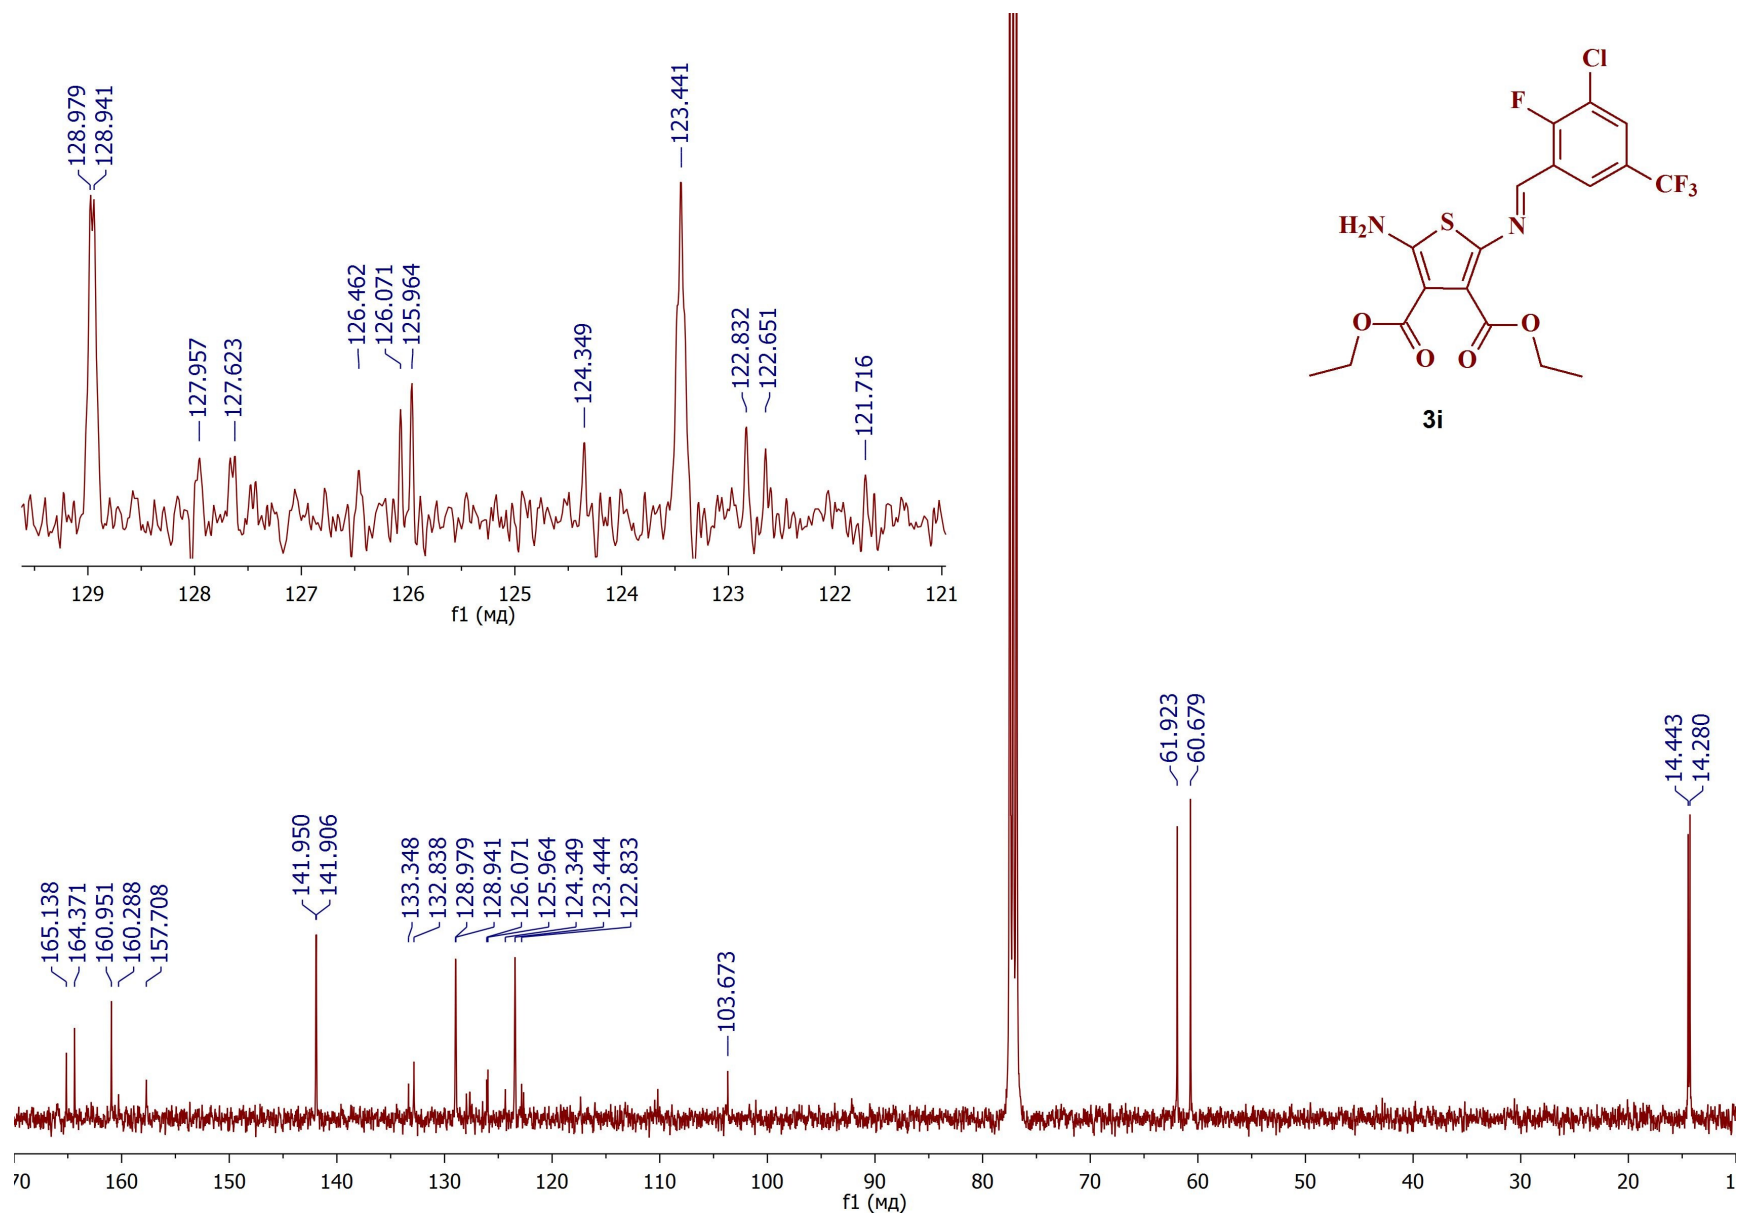

Figure SM-20.  $^{13}\text{C}$  NMR spectrum of **3i**

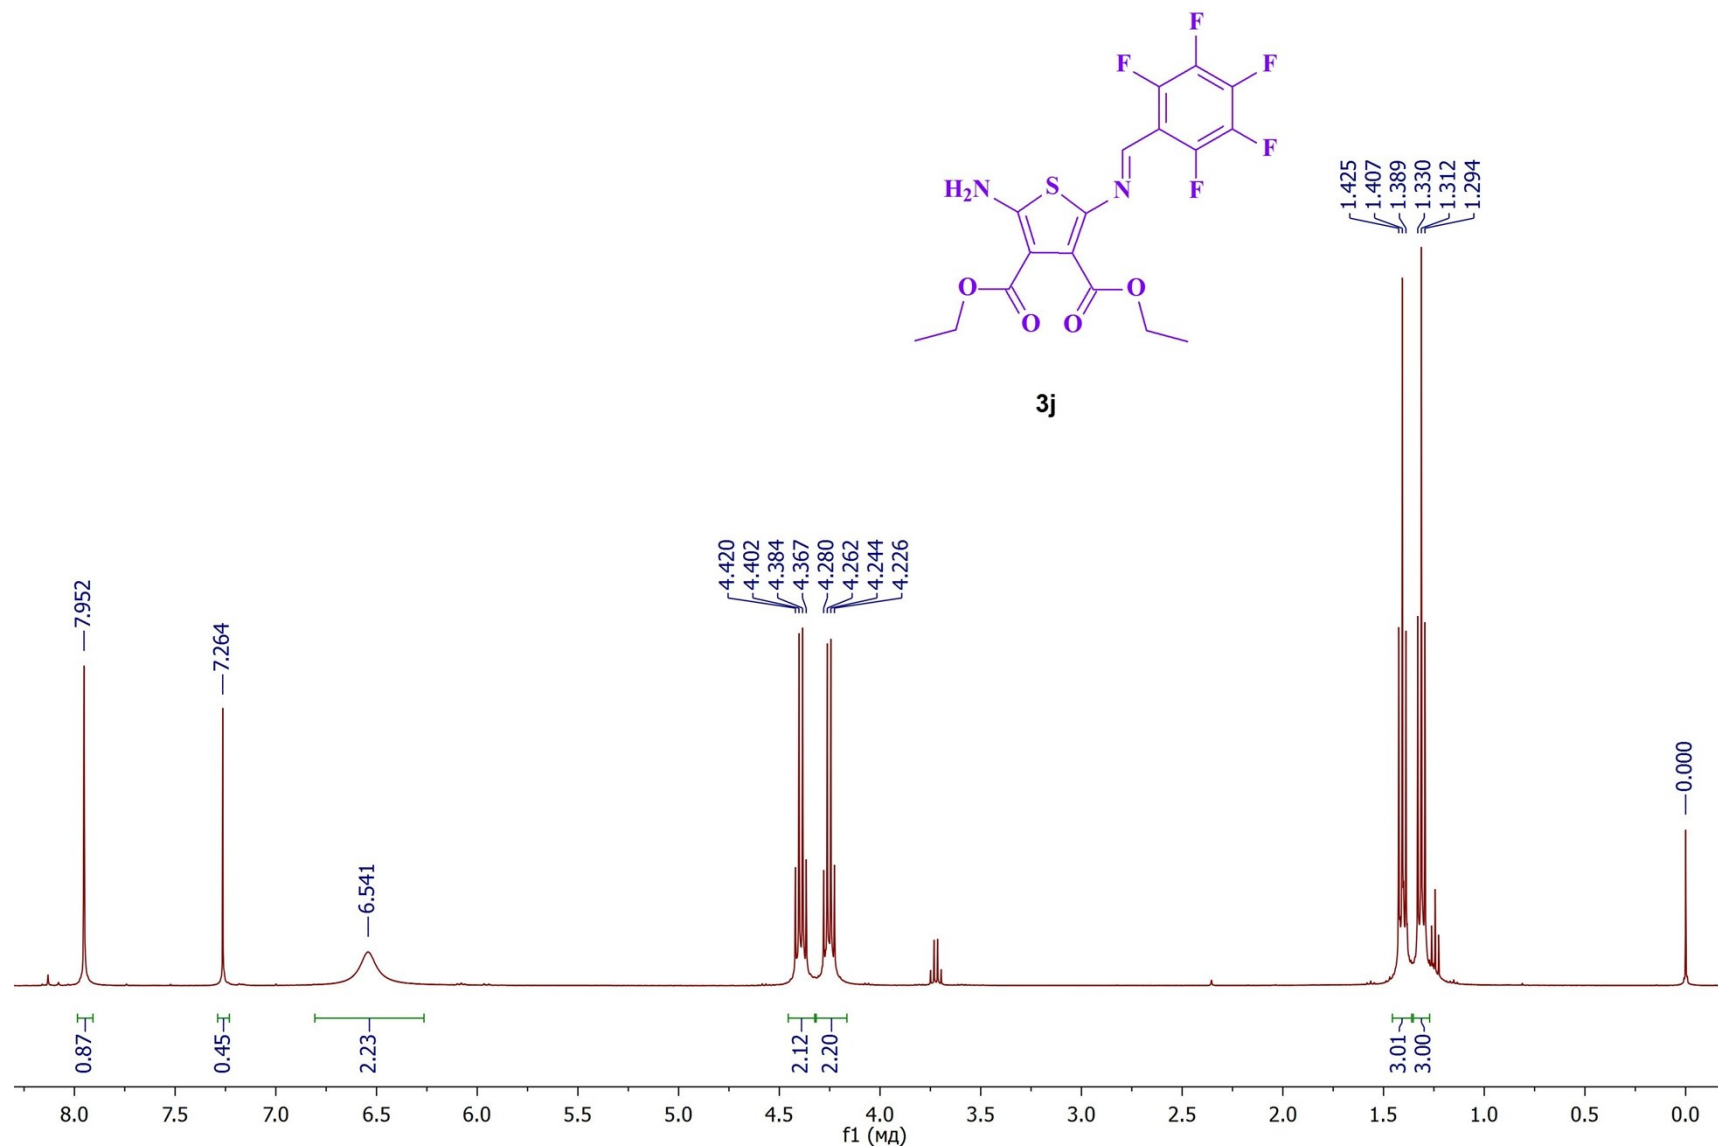

Figure SM-21. <sup>1</sup>H NMR spectrum of 3j

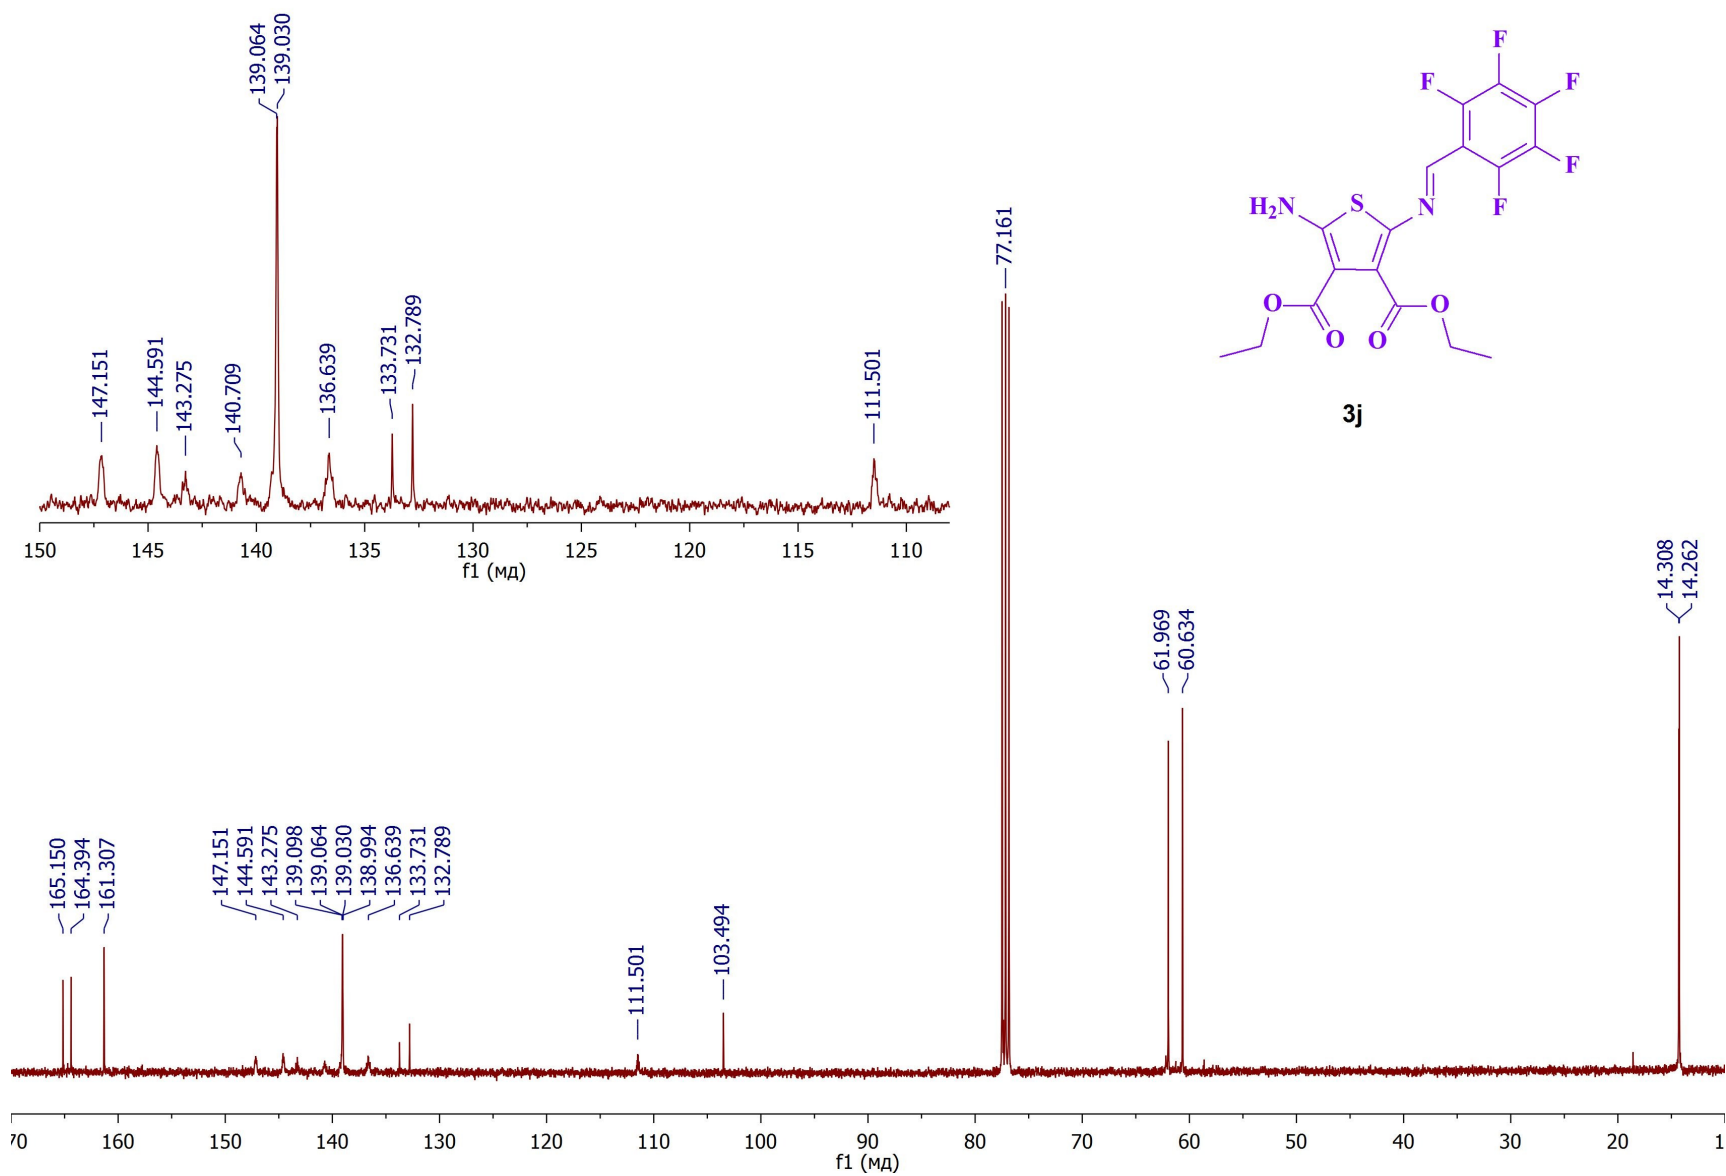

Figure SM-22.  $^{13}\text{C}$  NMR spectrum of **3j**

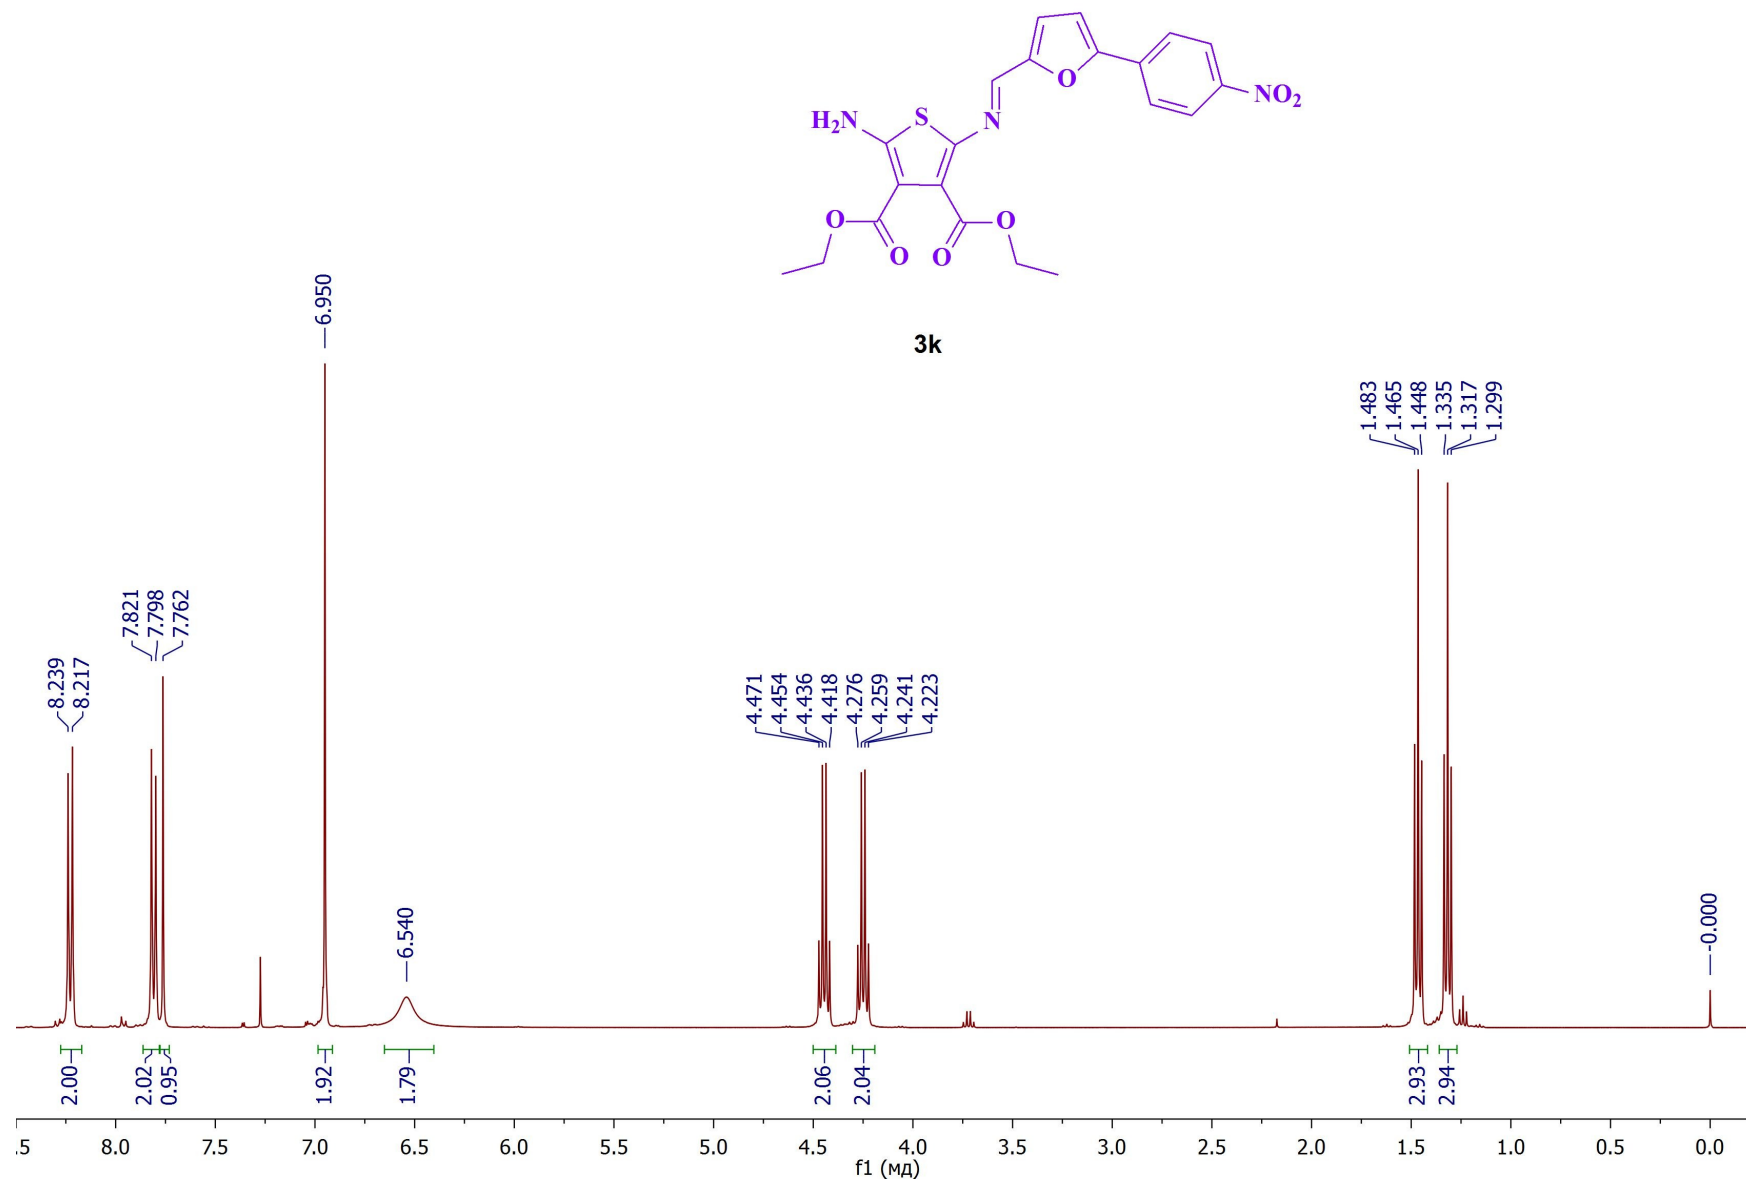

Figure SM-23. <sup>1</sup>H NMR spectrum of 3k

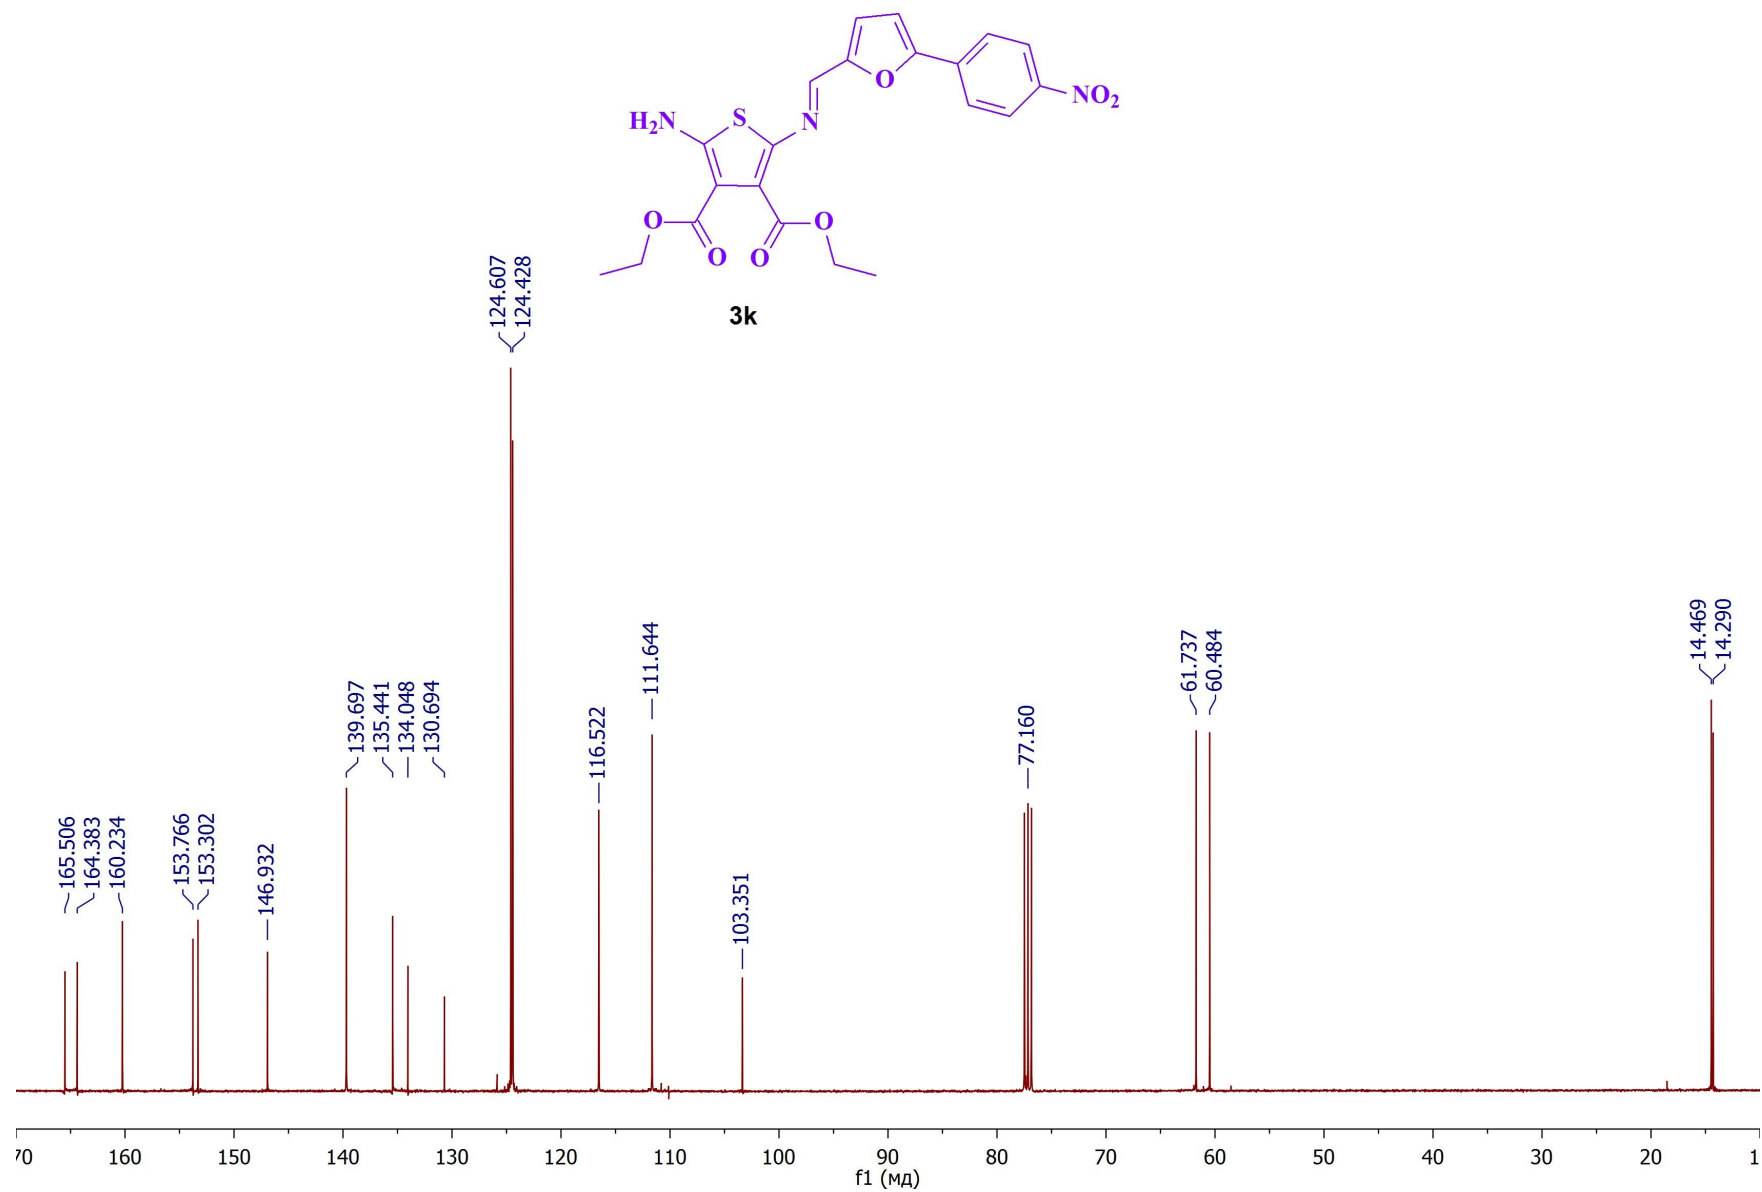

Figure SM-24.  $^{13}\text{C}$  NMR spectrum of 3k

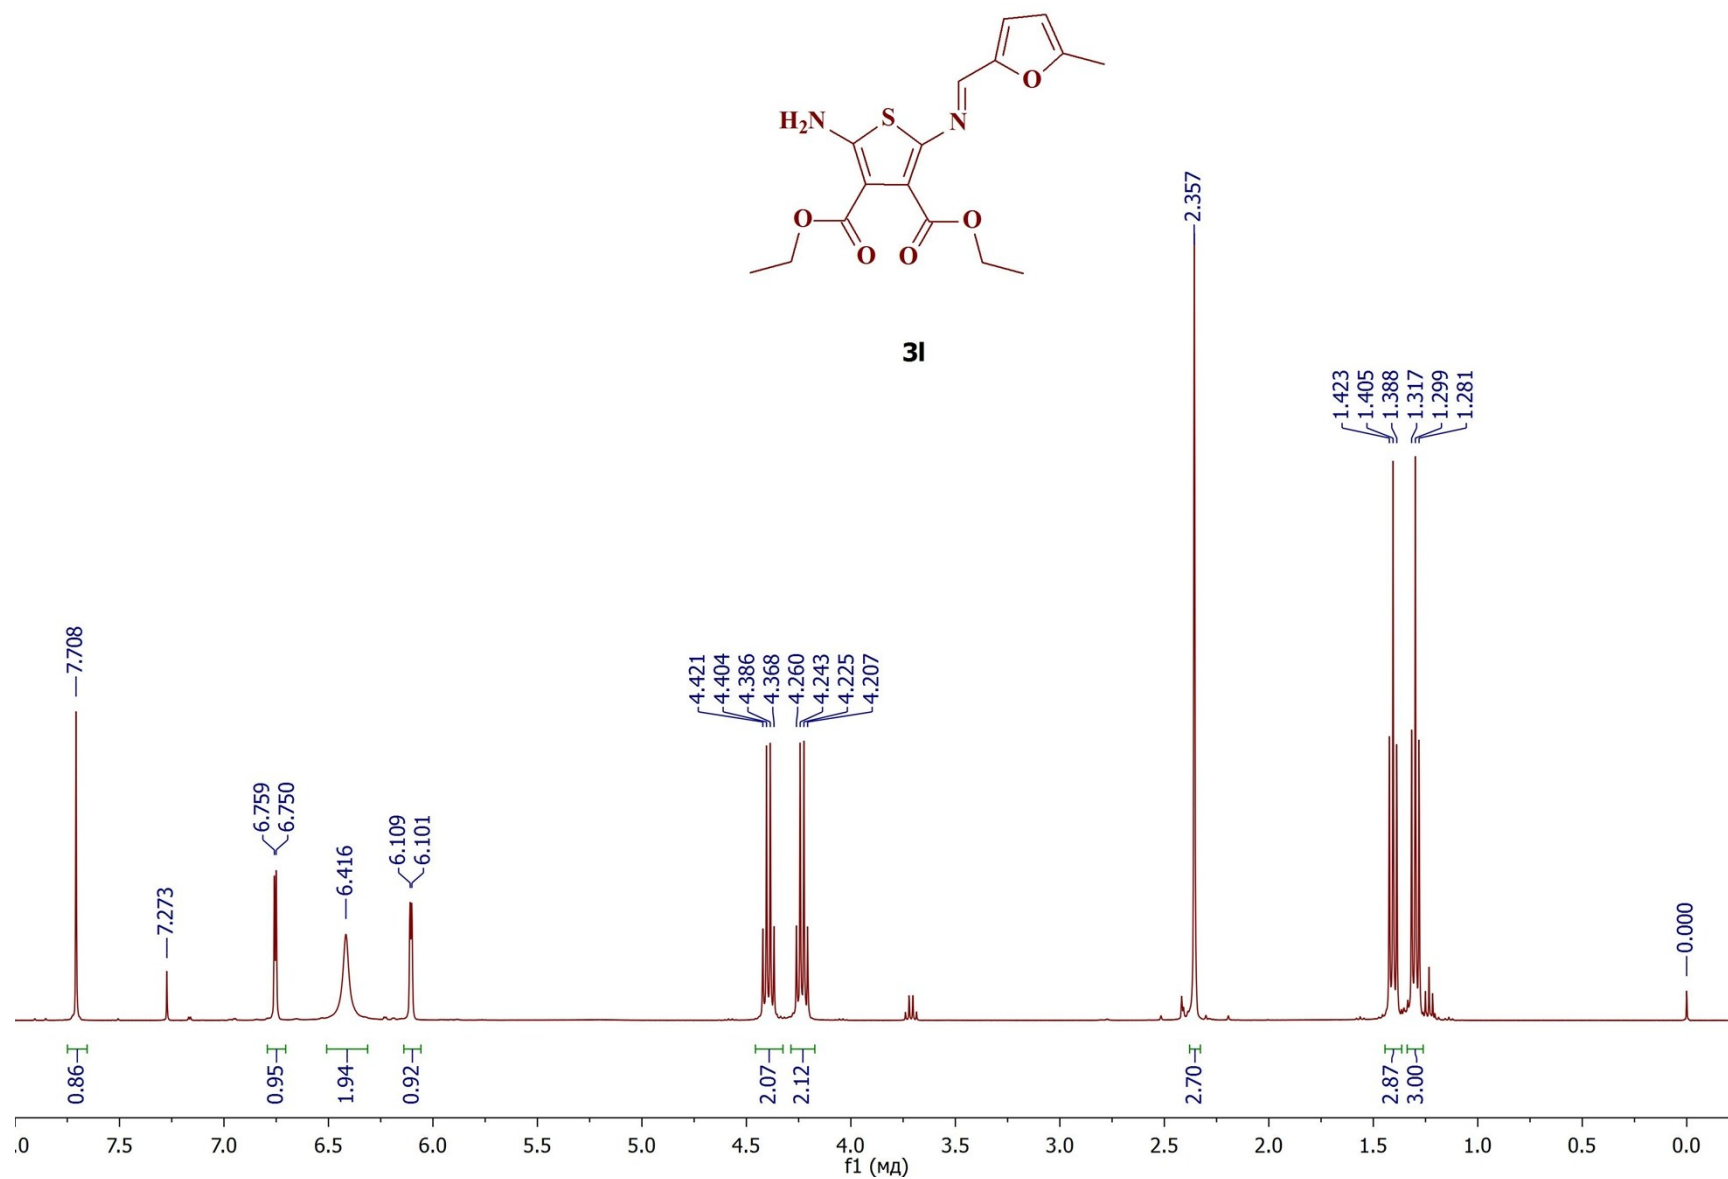

Figure SM-25. <sup>1</sup>H NMR spectrum of 31

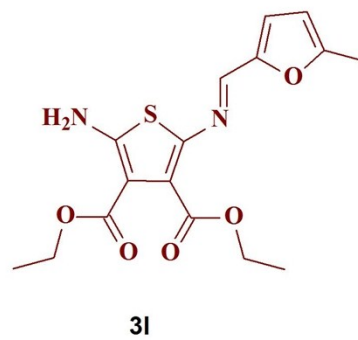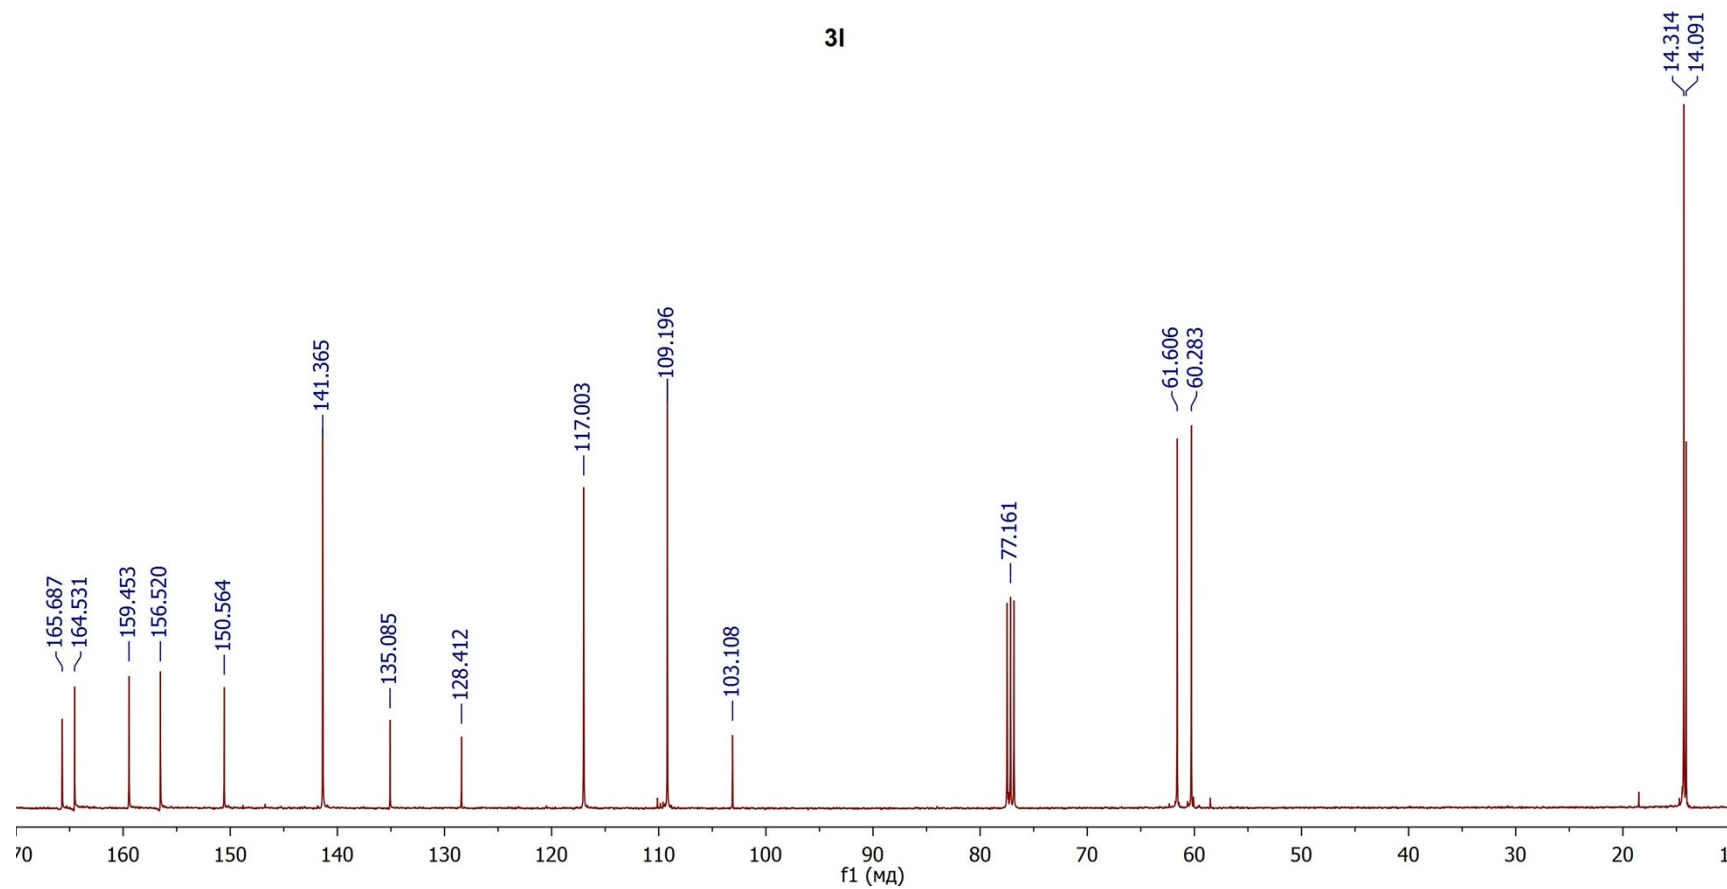

Figure SM-26.  $^{13}\text{C}$  NMR spectrum of **31**

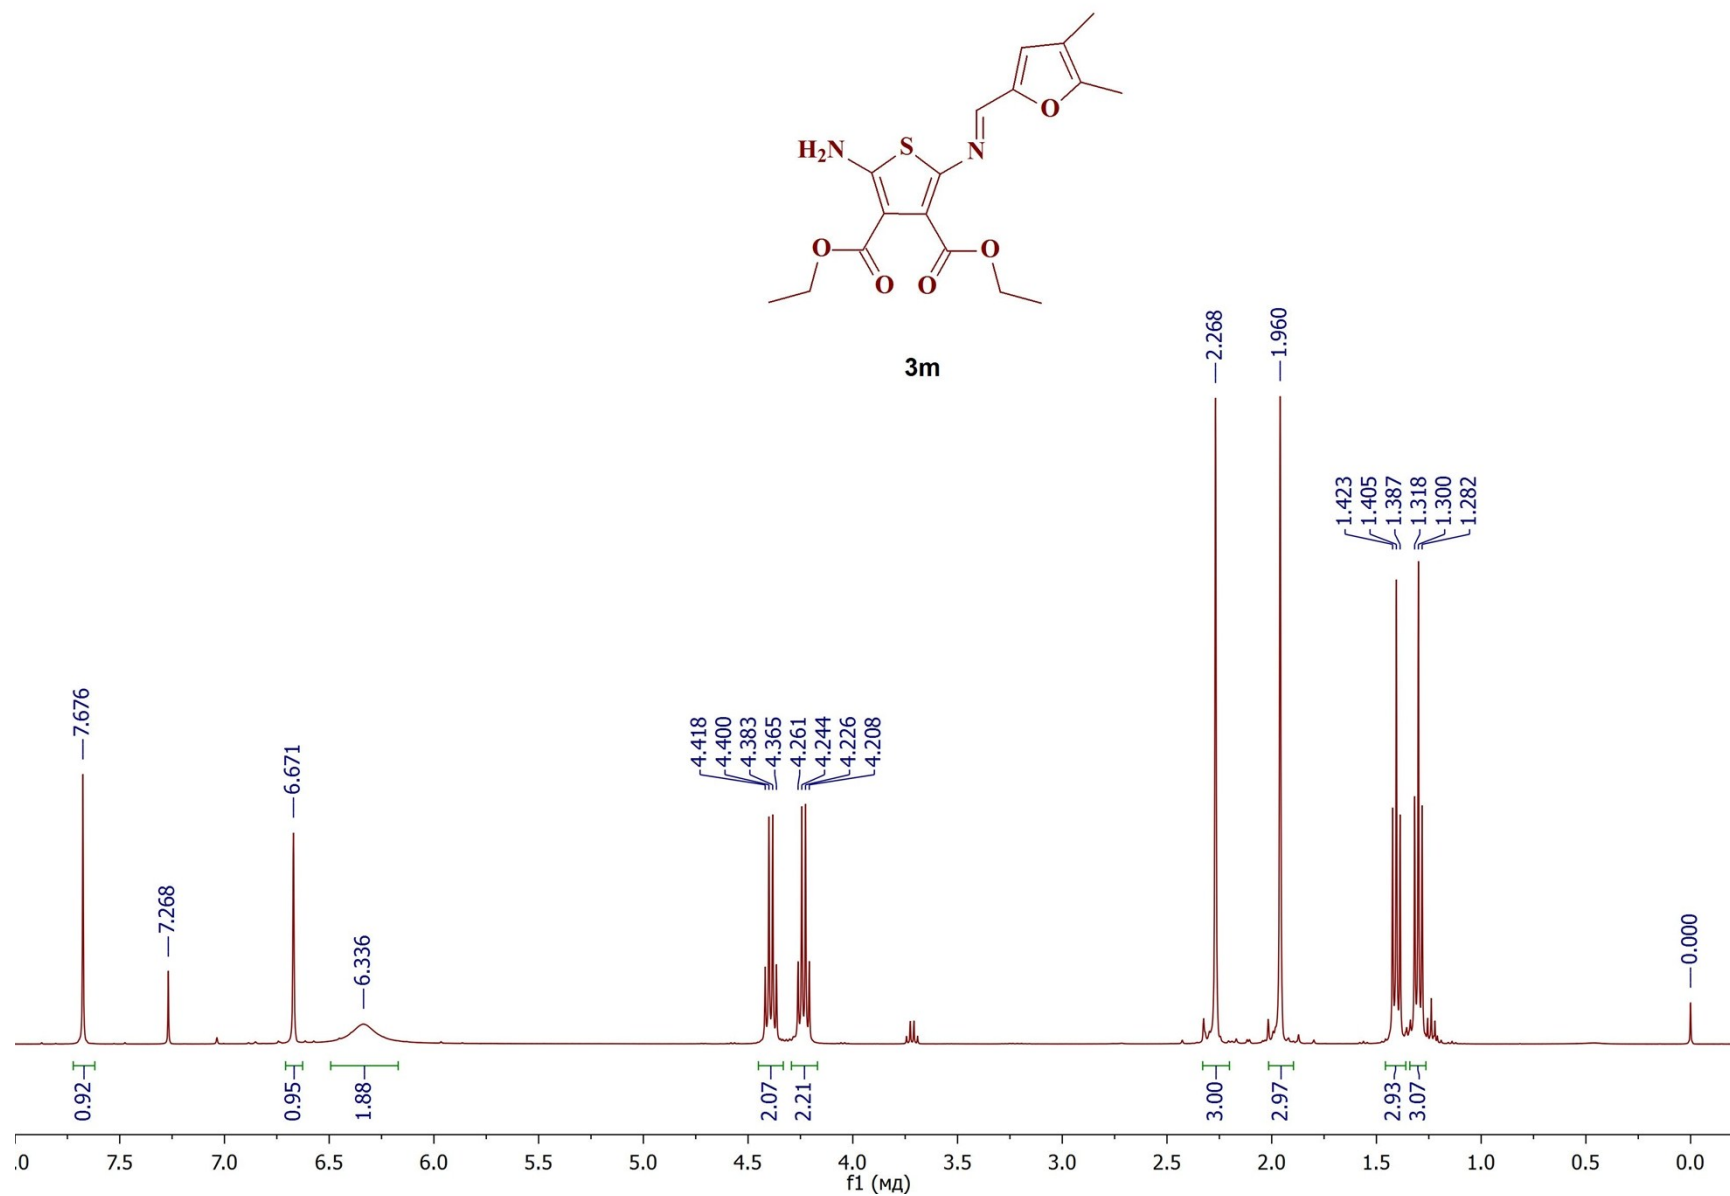

Figure SM-27. <sup>1</sup>H NMR spectrum of 3m



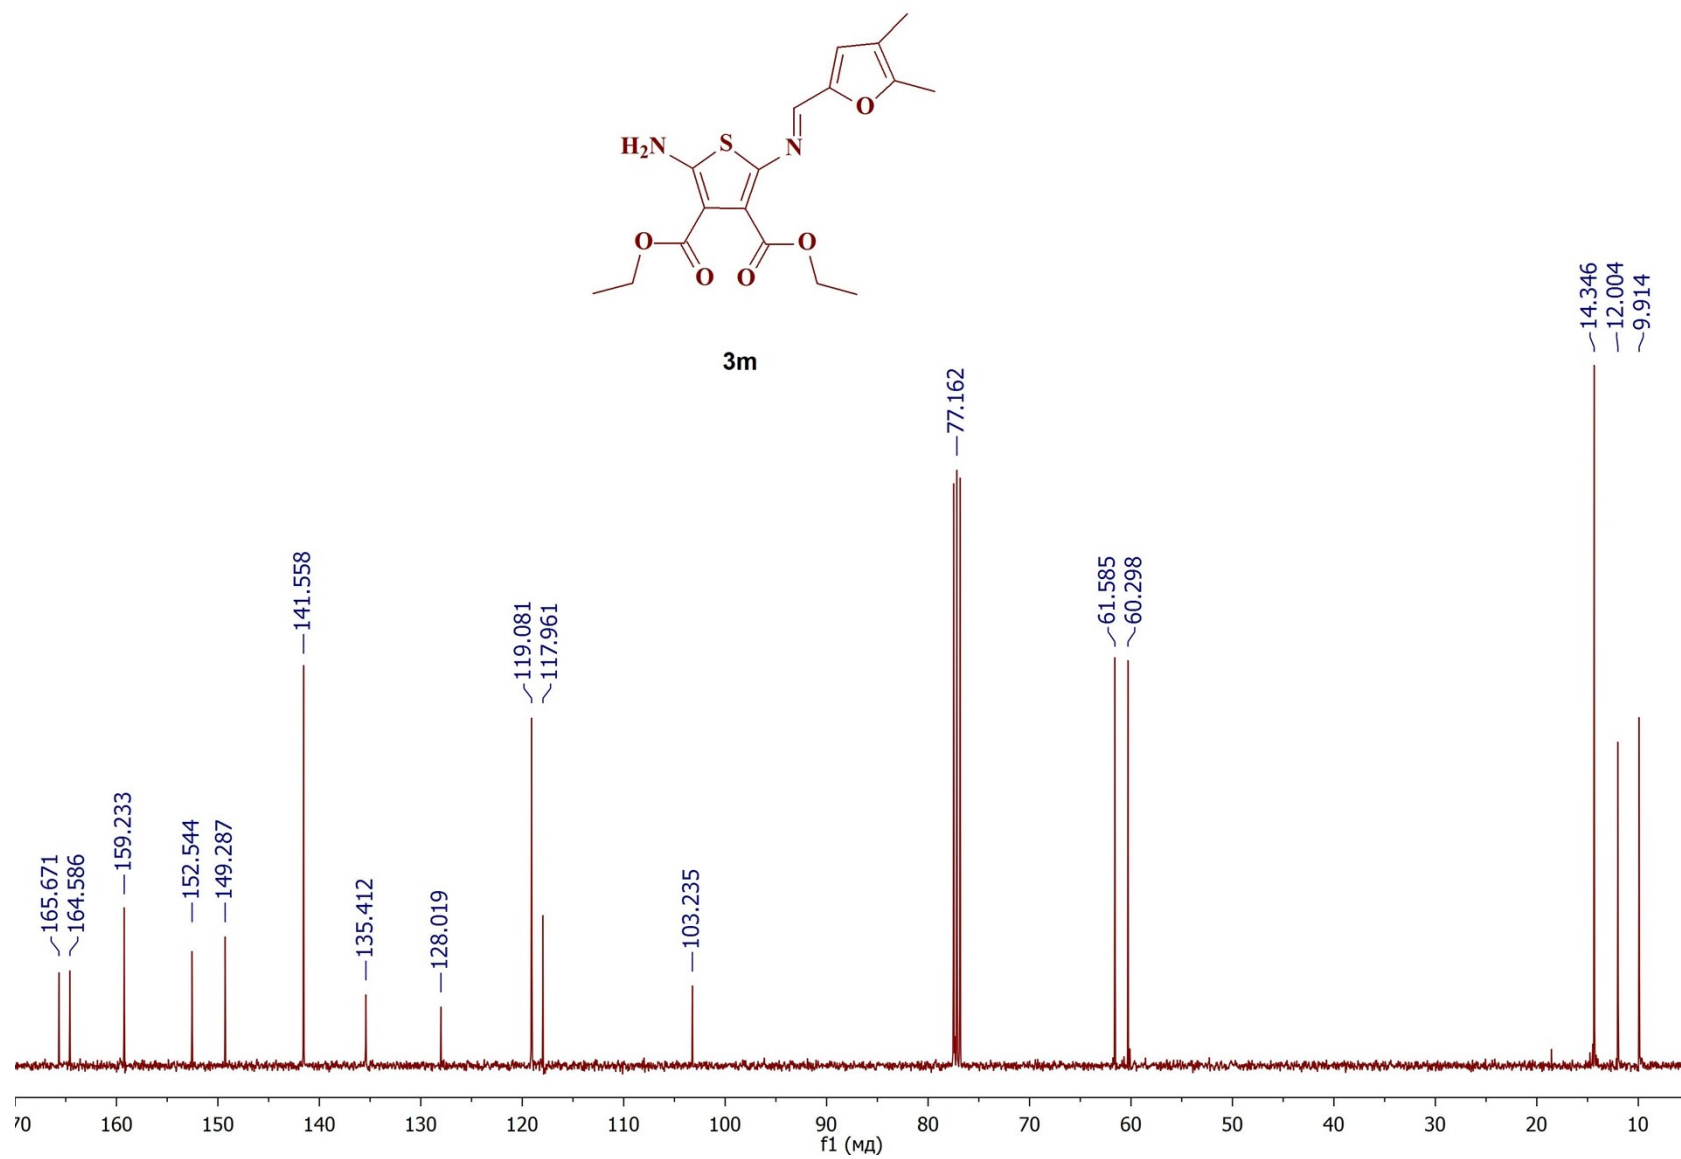

Figure SM-28.  $^{13}\text{C}$  NMR spectrum of 3m

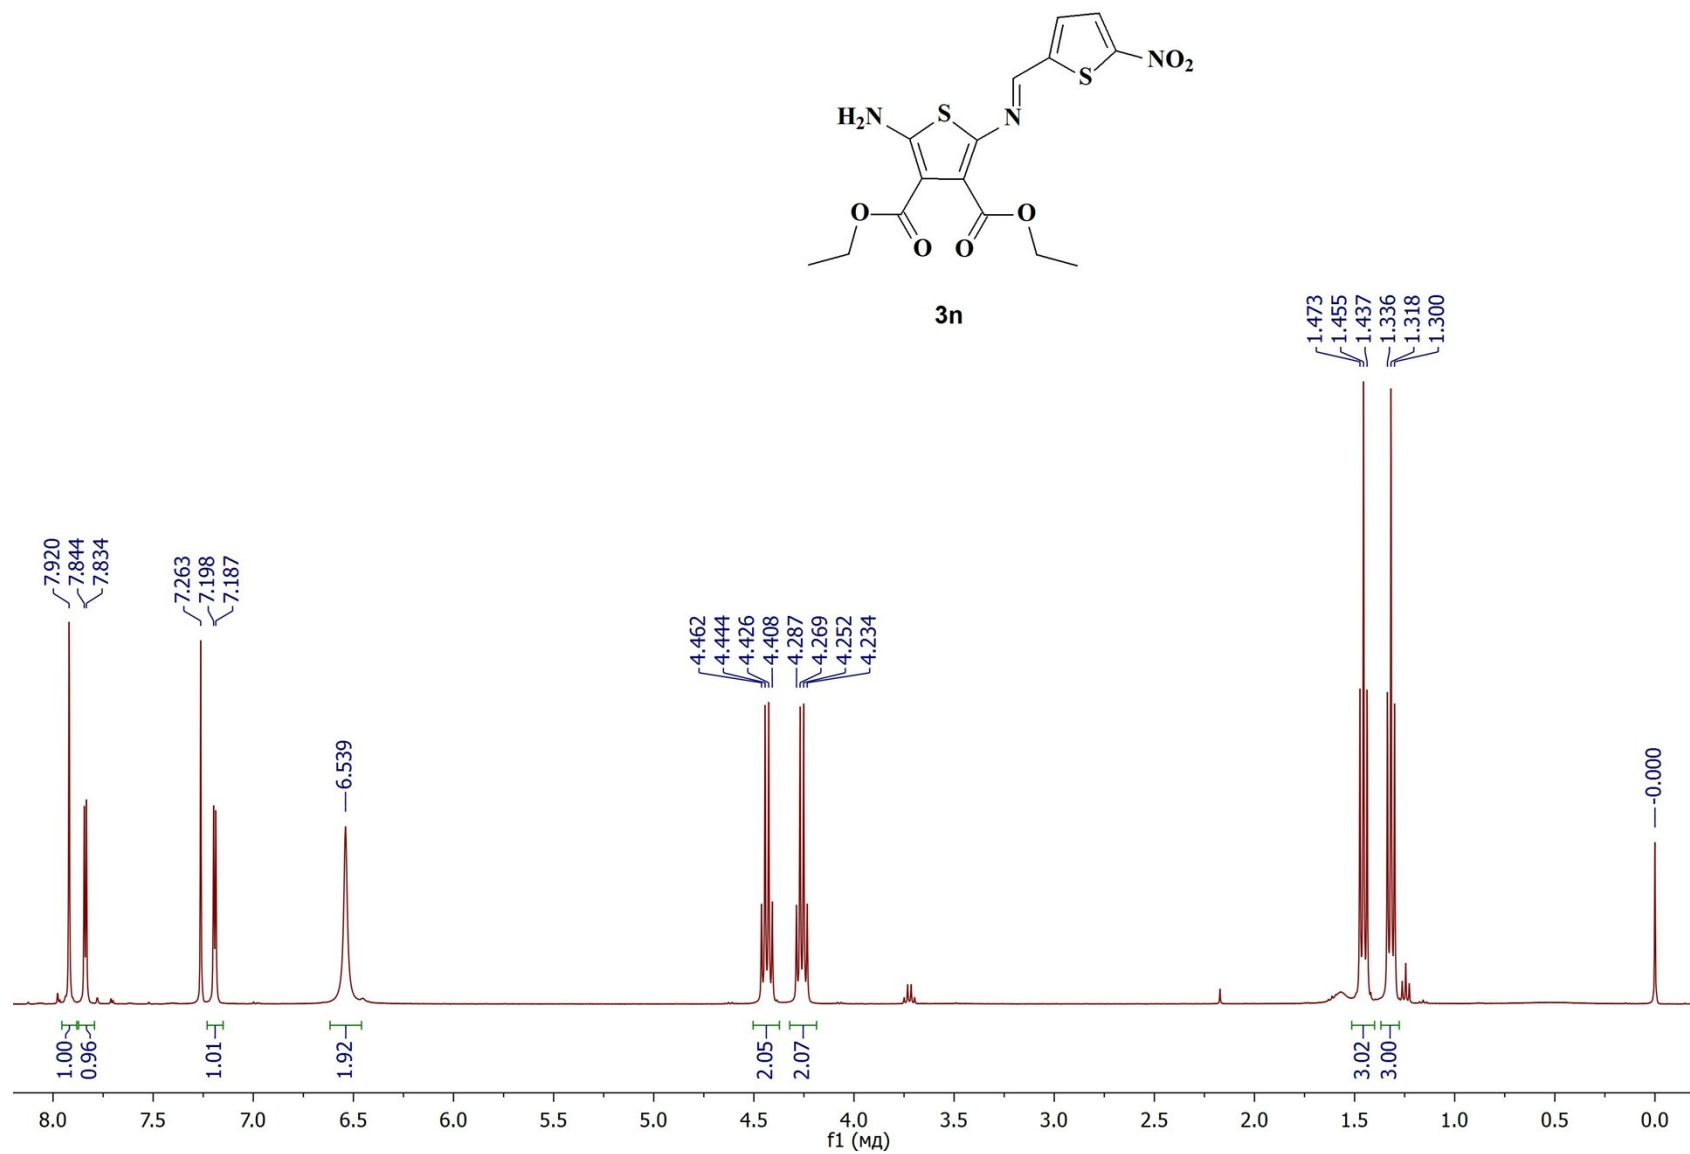

Figure SM-29.  $^1\text{H}$  NMR spectrum of 3n

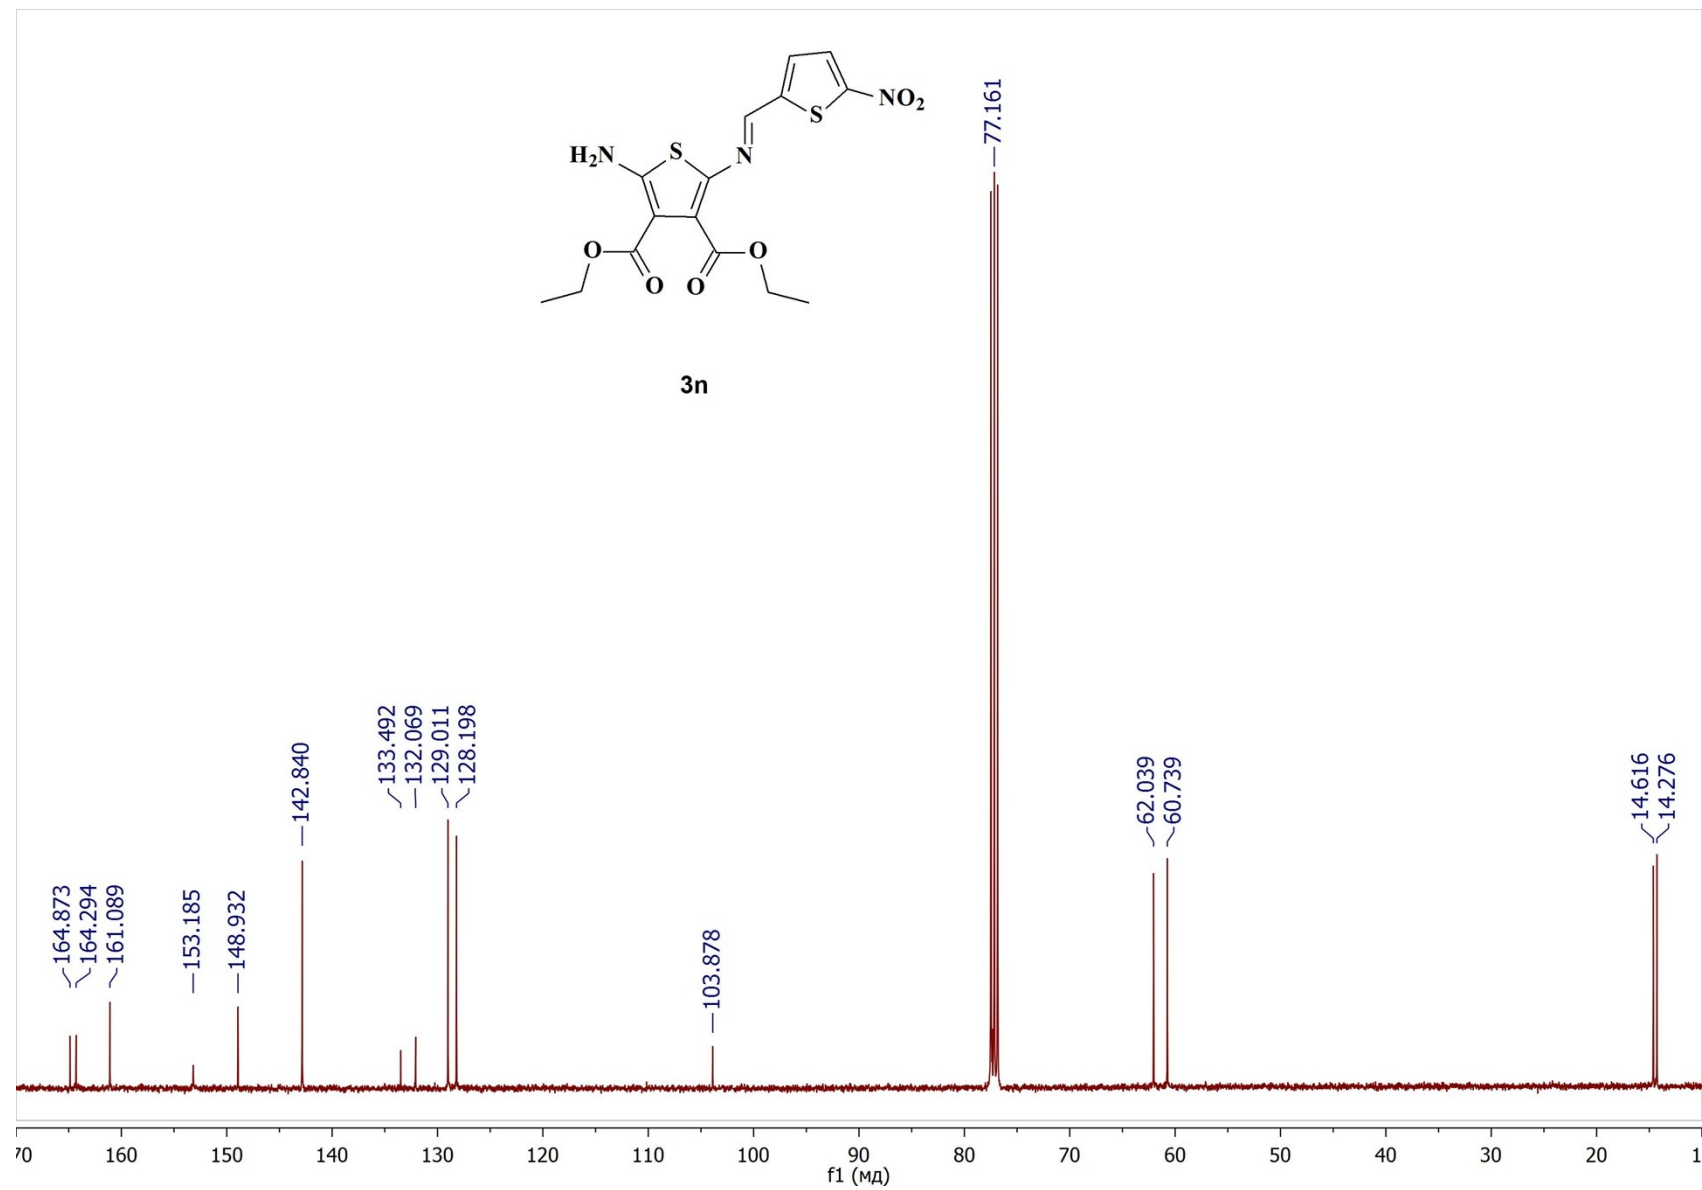

Figure SM-30.  $^{13}\text{C}$  NMR spectrum of **3n**

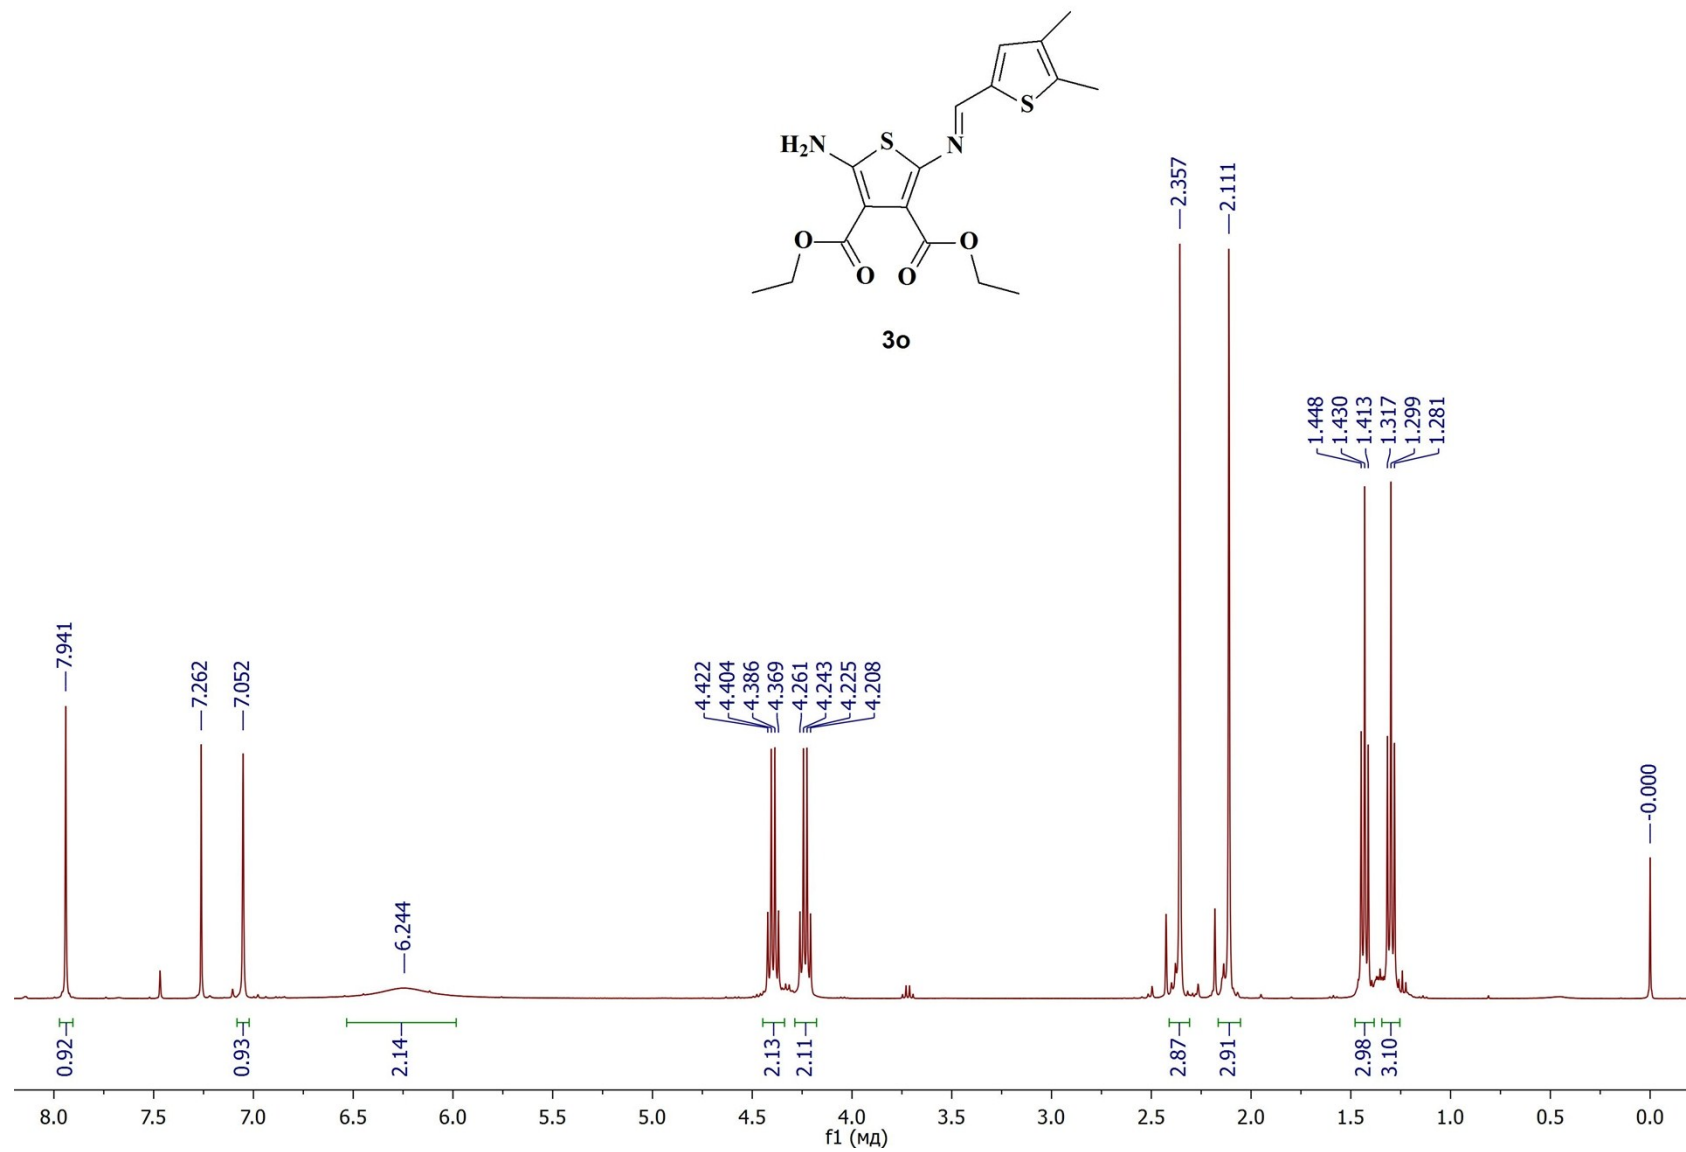

Figure SM-31. <sup>1</sup>H NMR spectrum of **3o**

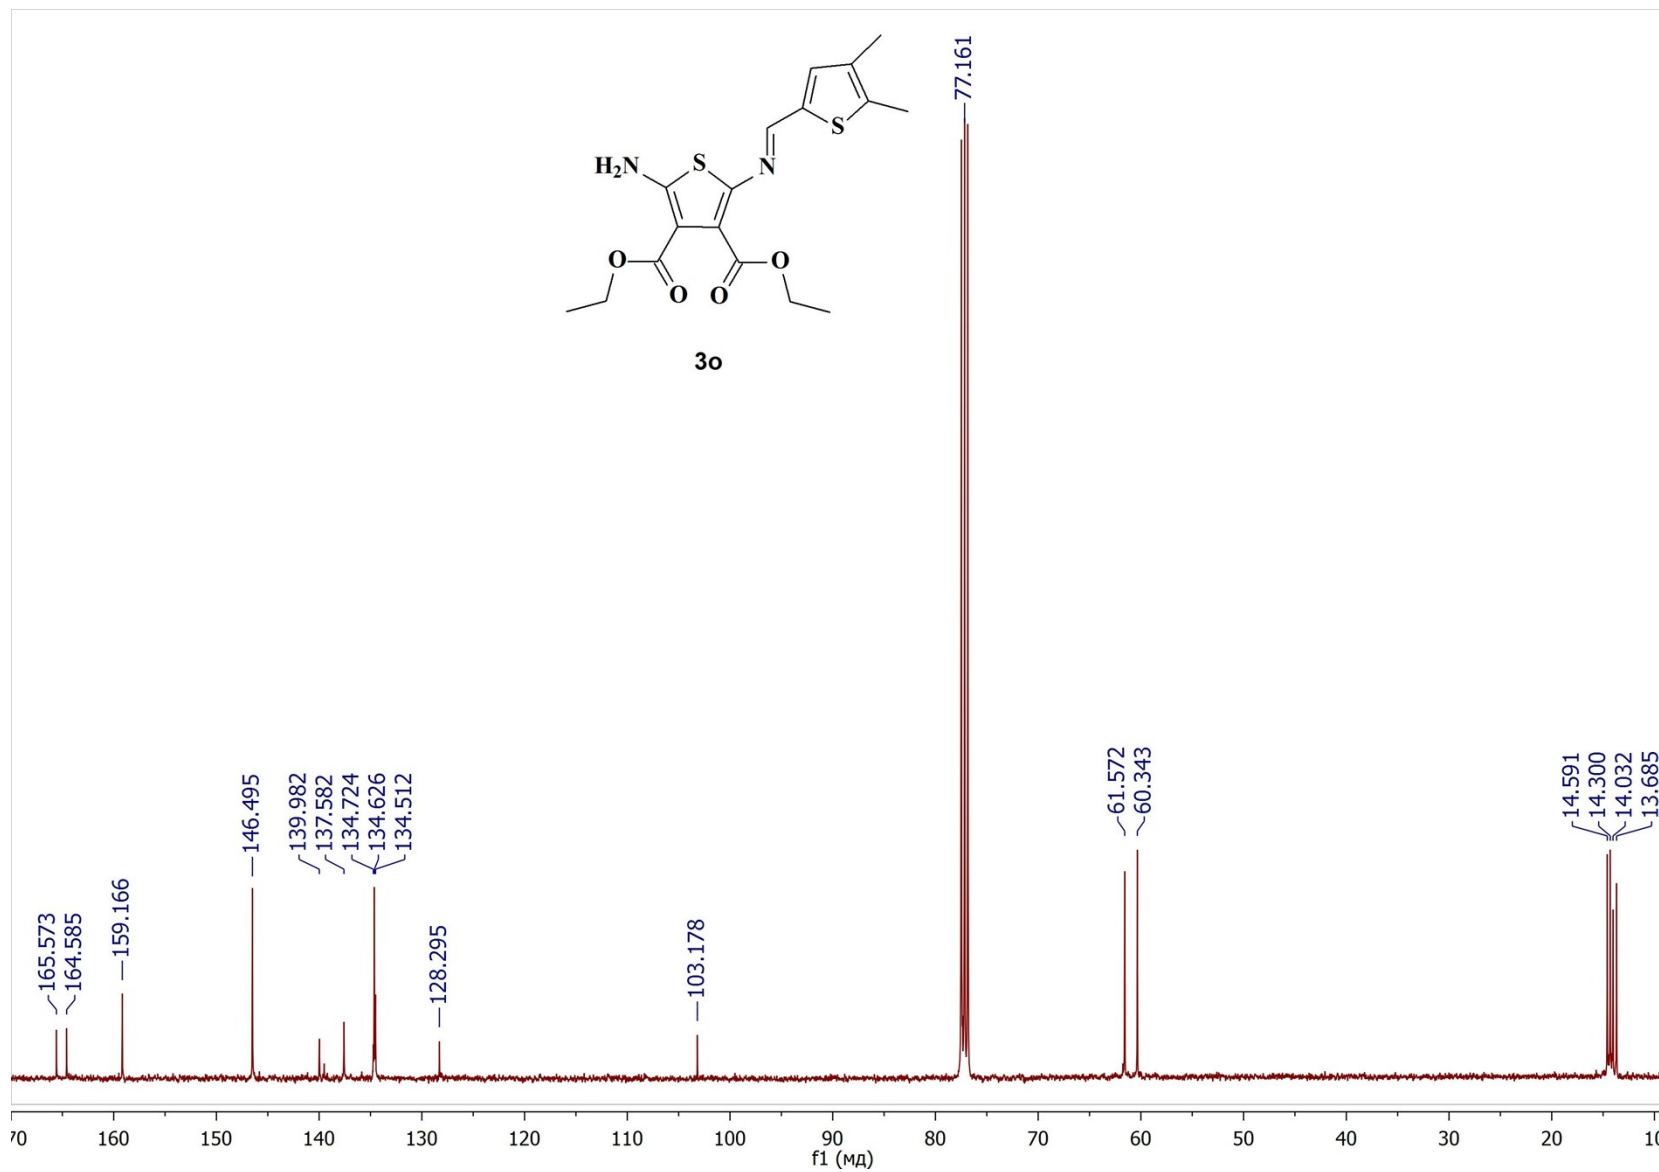

Figure SM-32.  $^{13}\text{C}$  NMR spectrum of **3o**

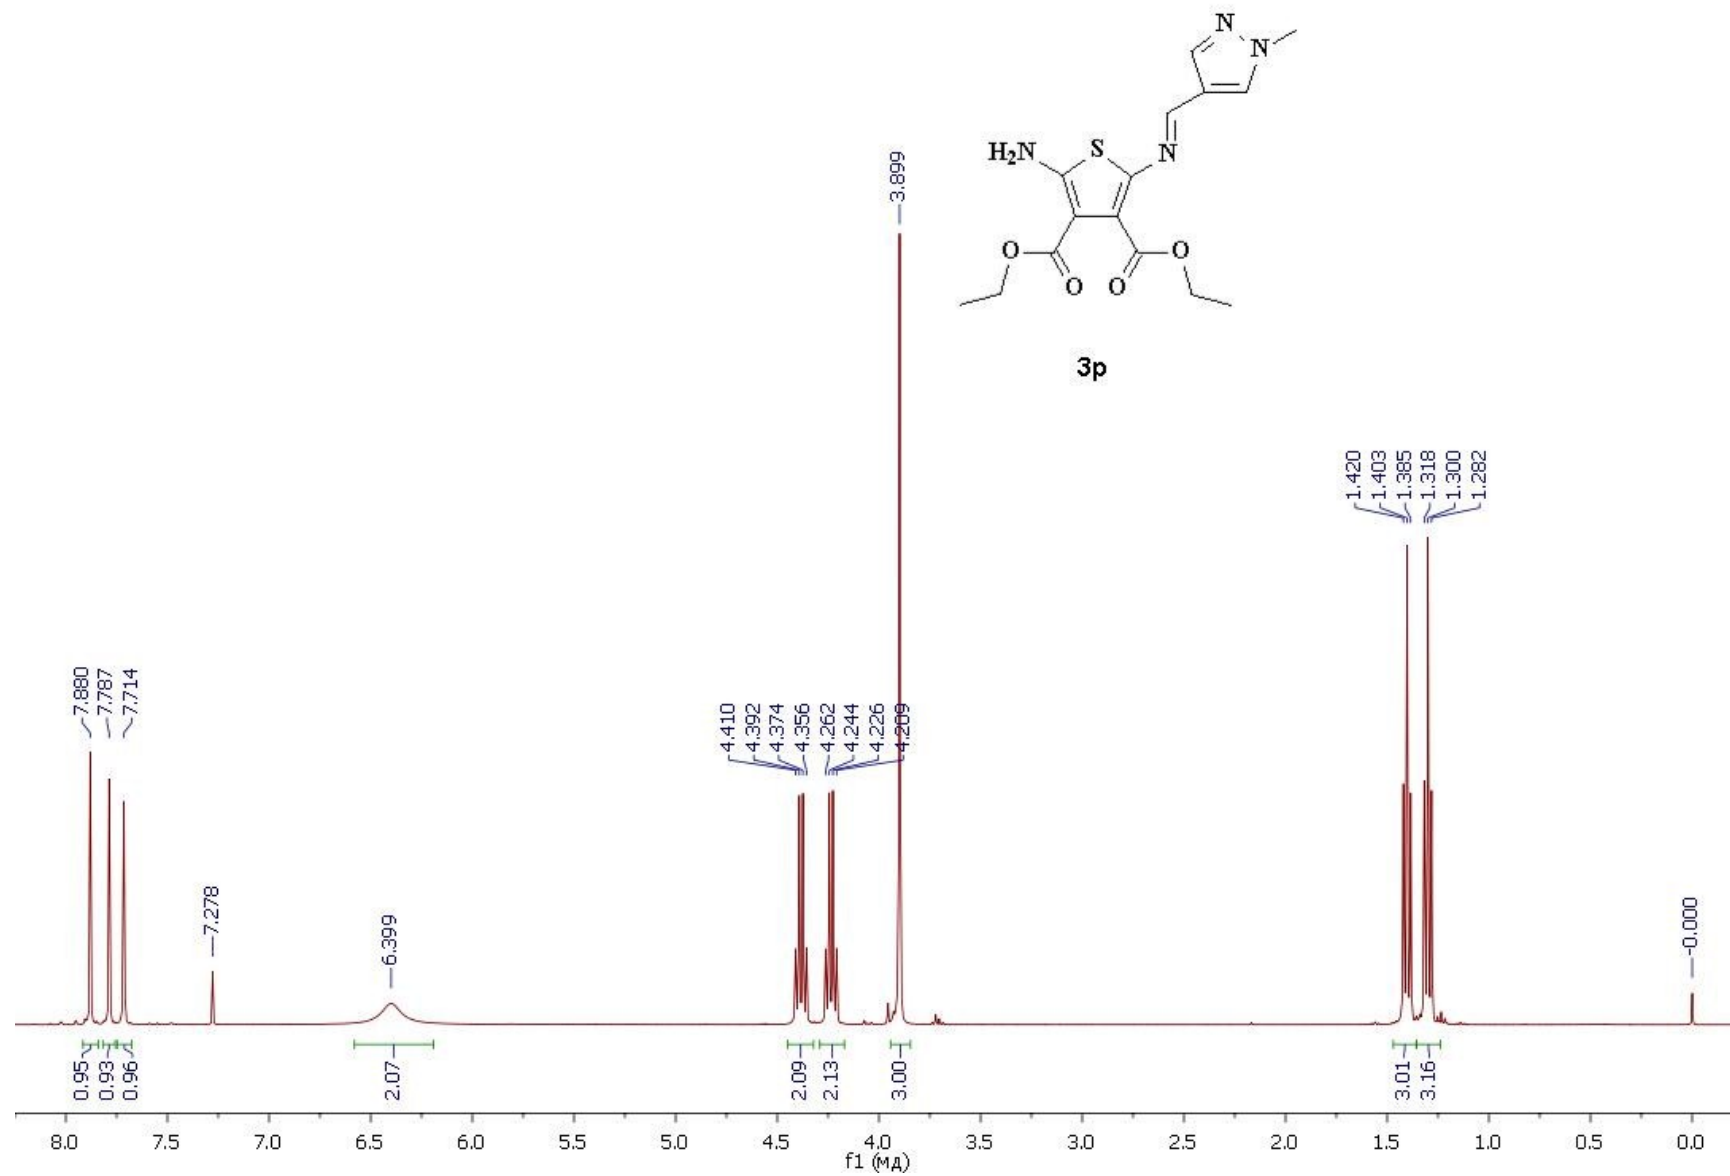

Figure SM-33. <sup>1</sup>H NMR spectrum of 3p

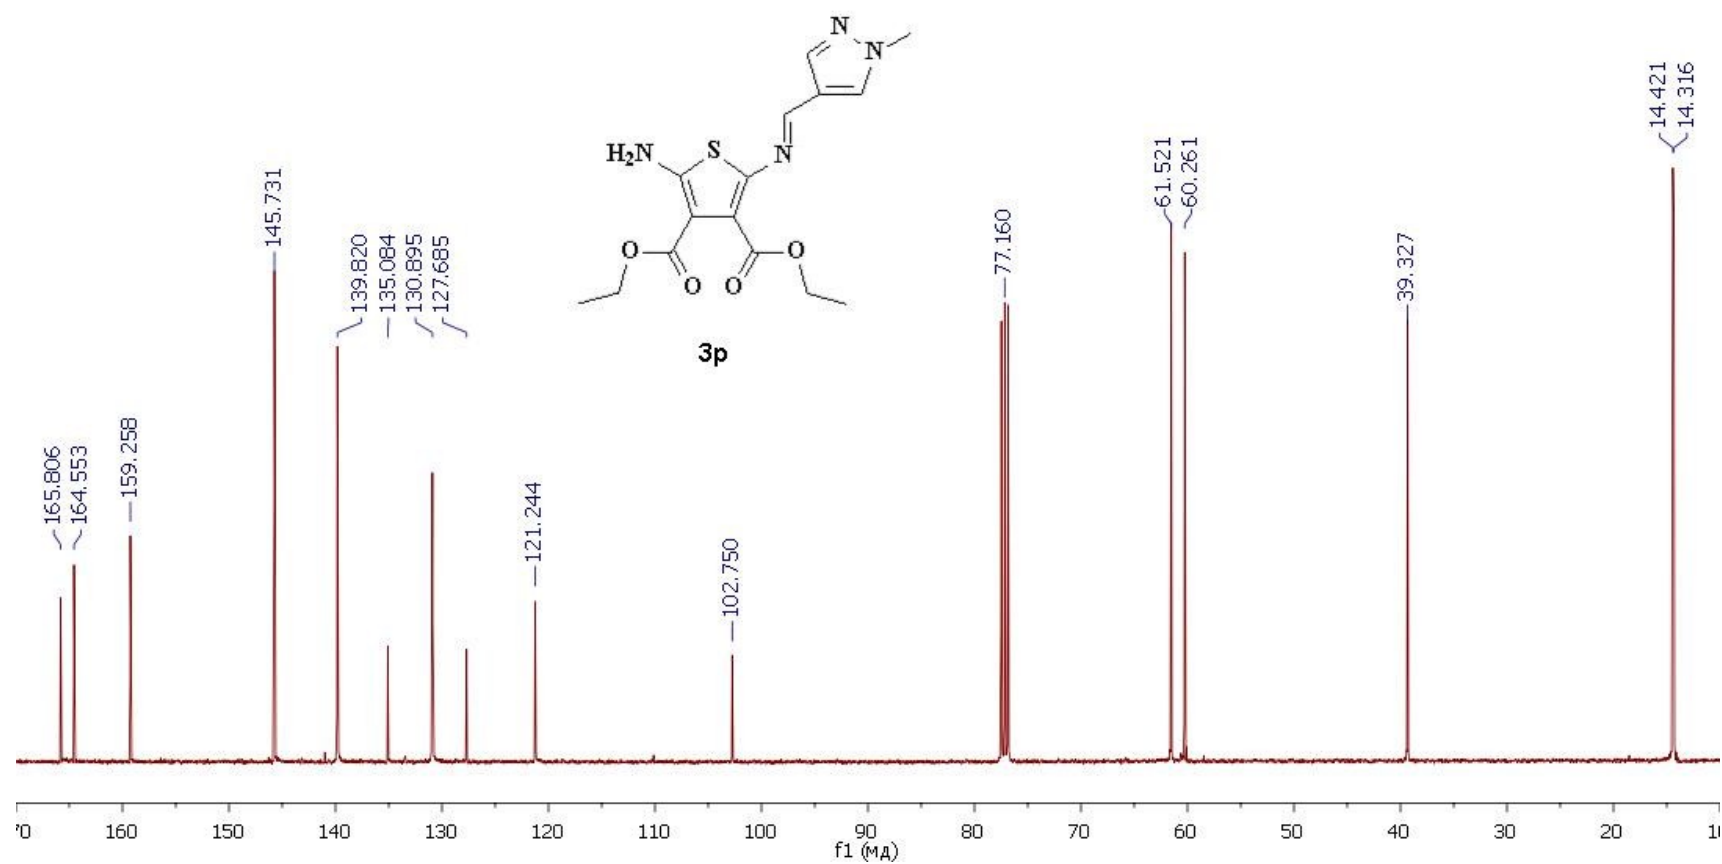

Figure SM-34.  $^{13}\text{C}$  NMR spectrum of **3p**

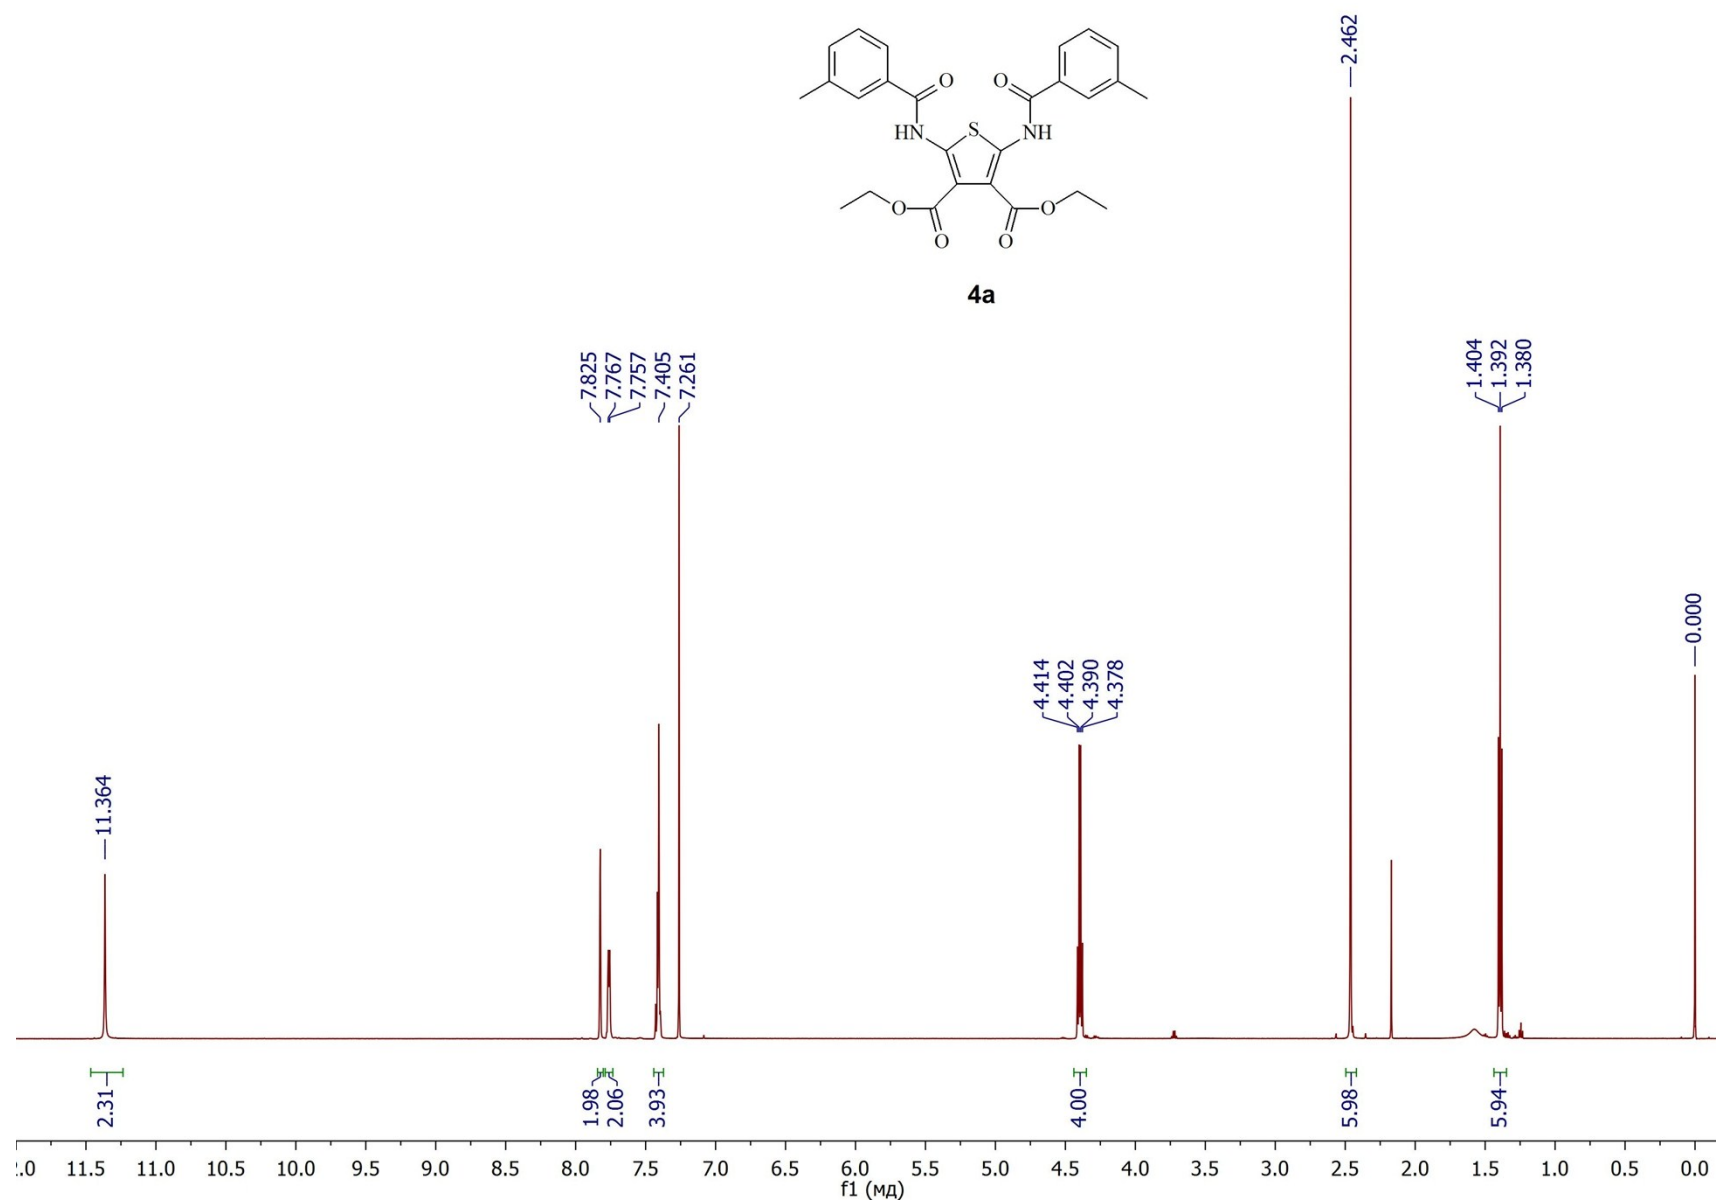Figure SM-35.  $^1\text{H}$  NMR spectrum of 4a



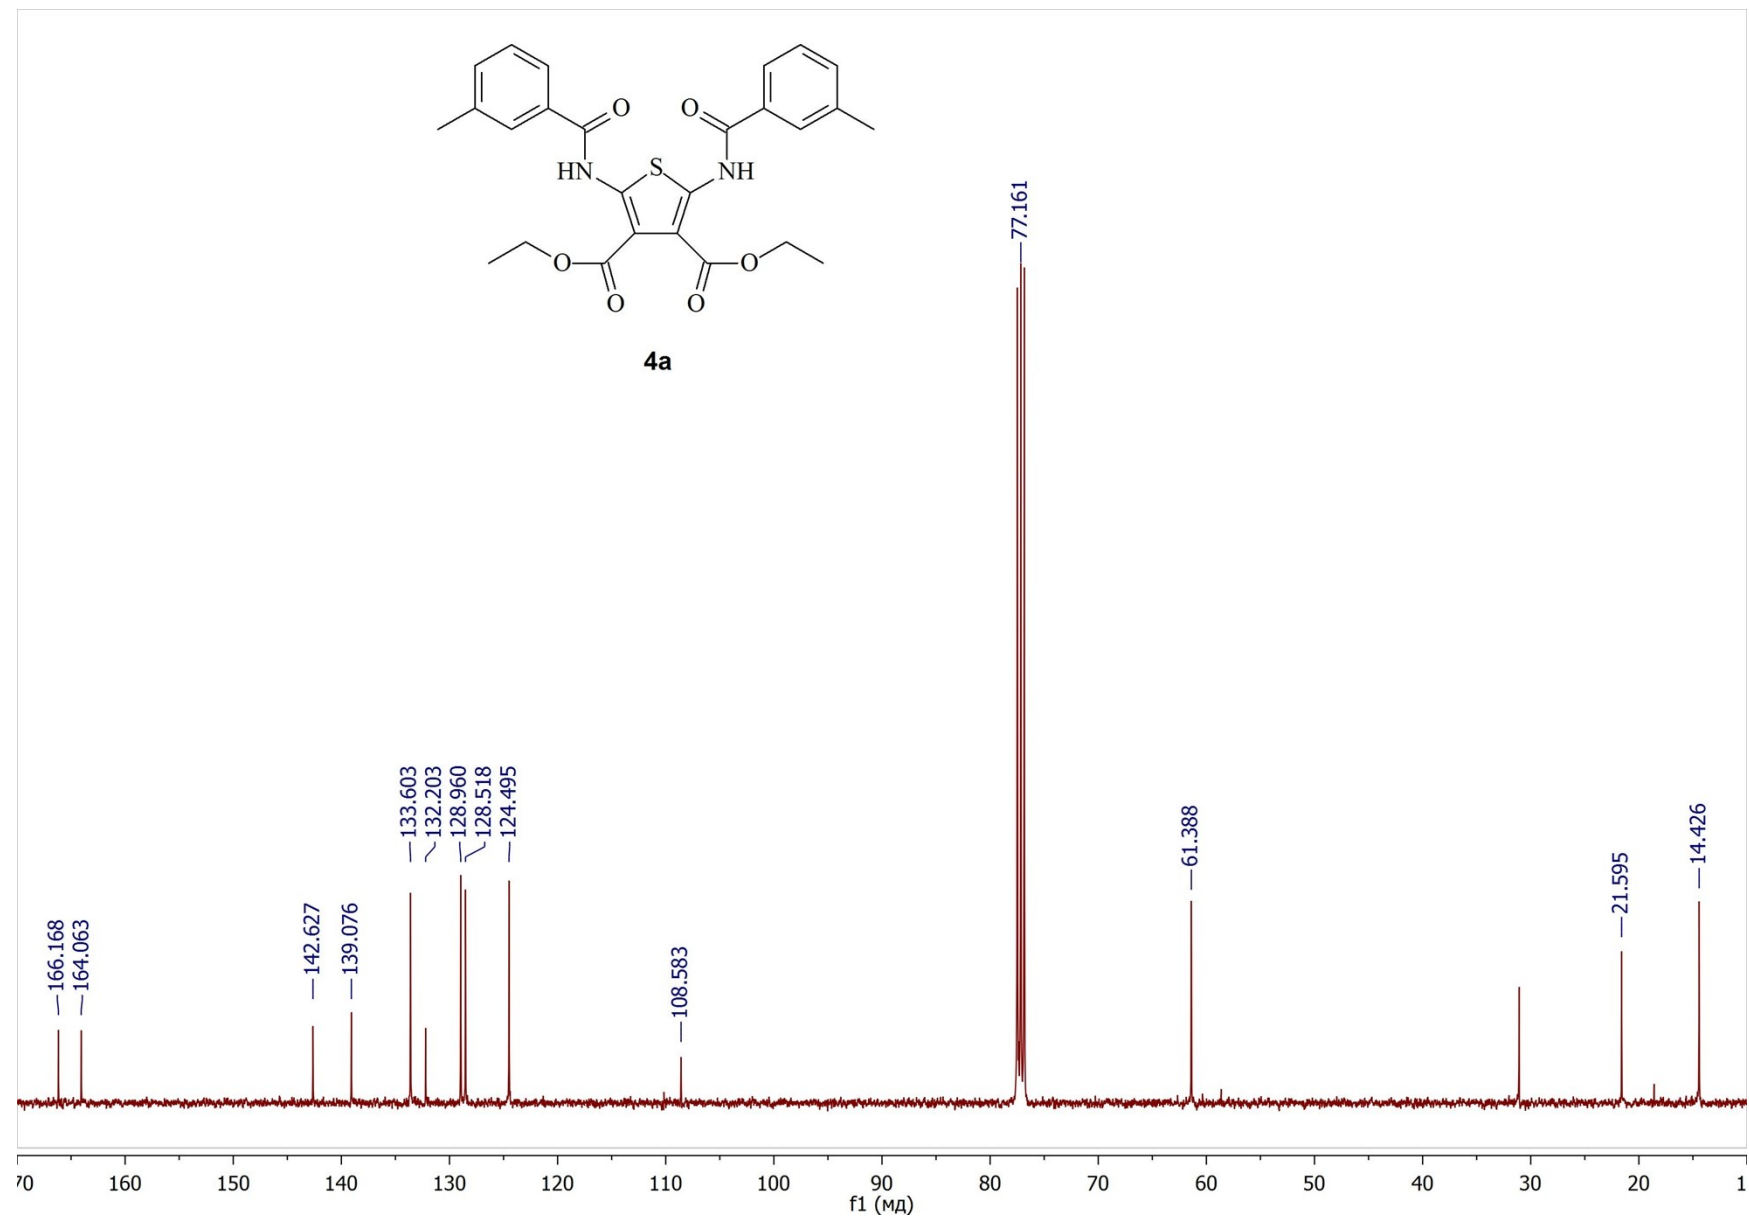

Figure SM-36.  $^{13}\text{C}$  NMR spectrum of **4a**

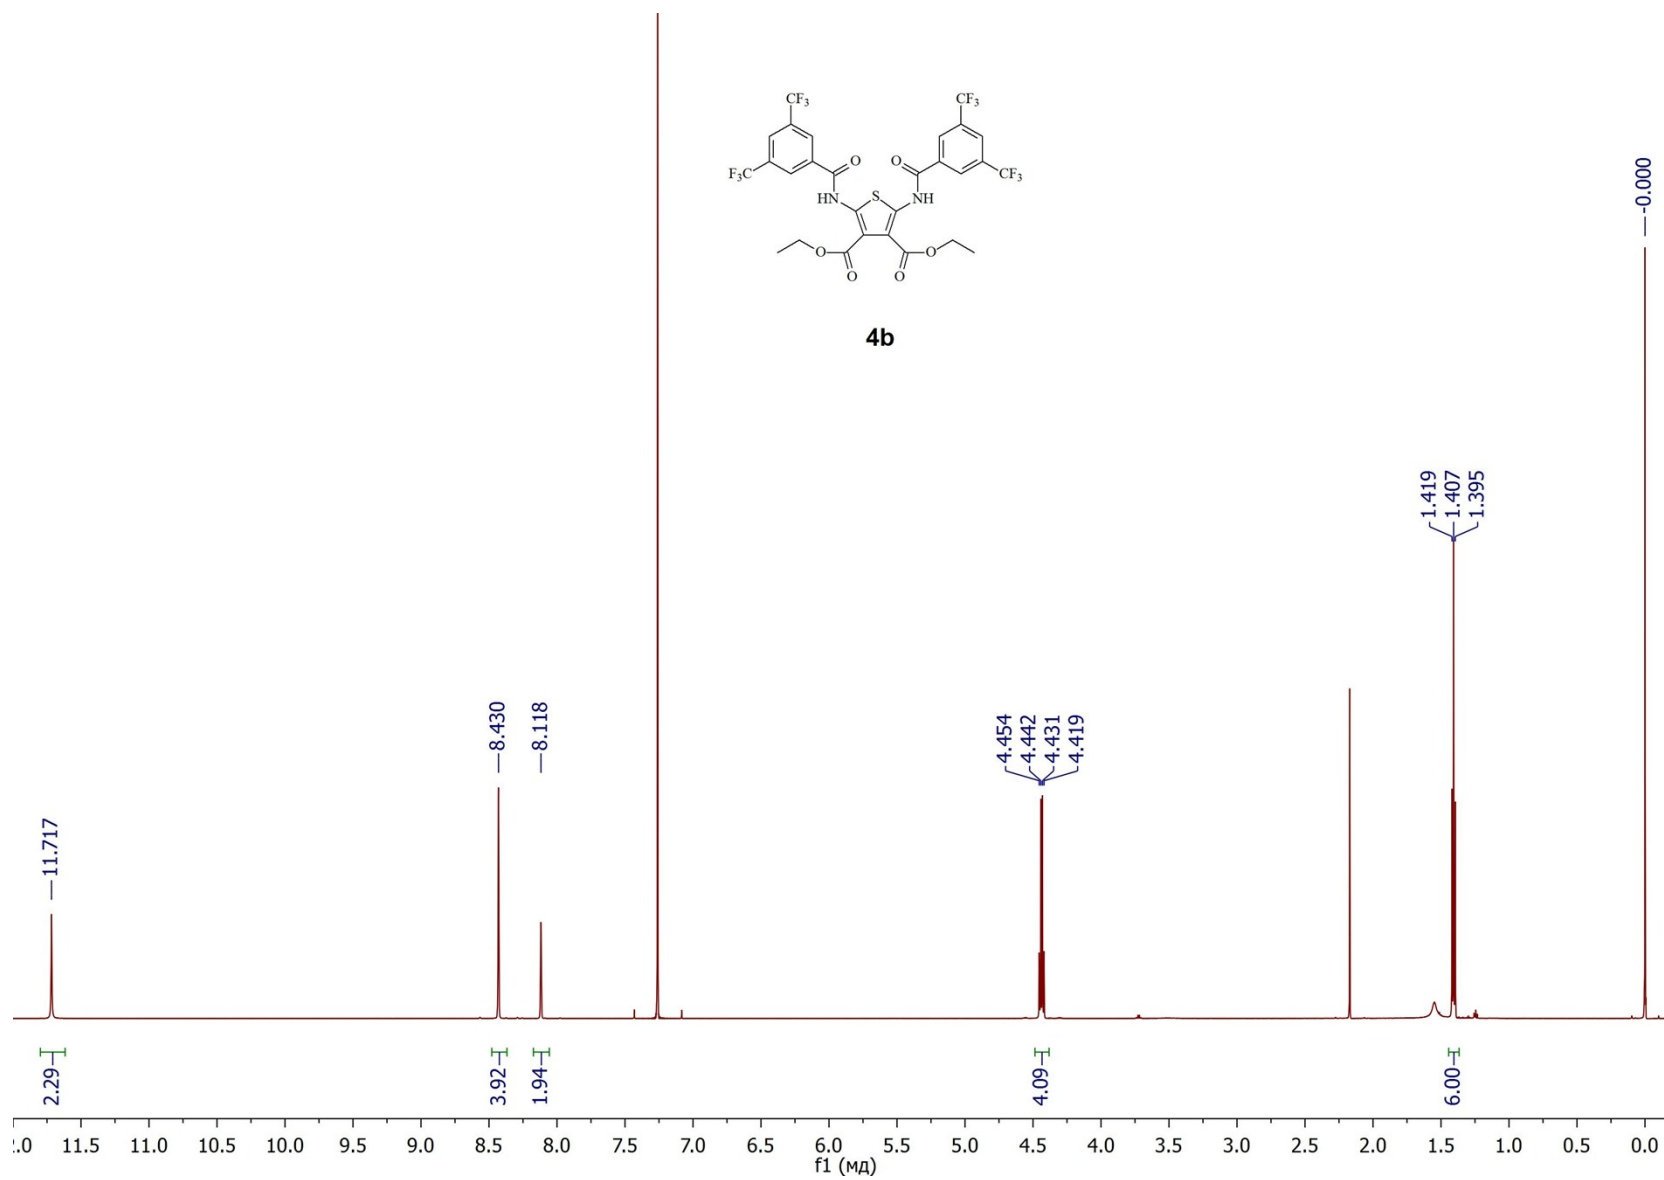Figure SM-37. <sup>1</sup>H NMR spectrum of 4b

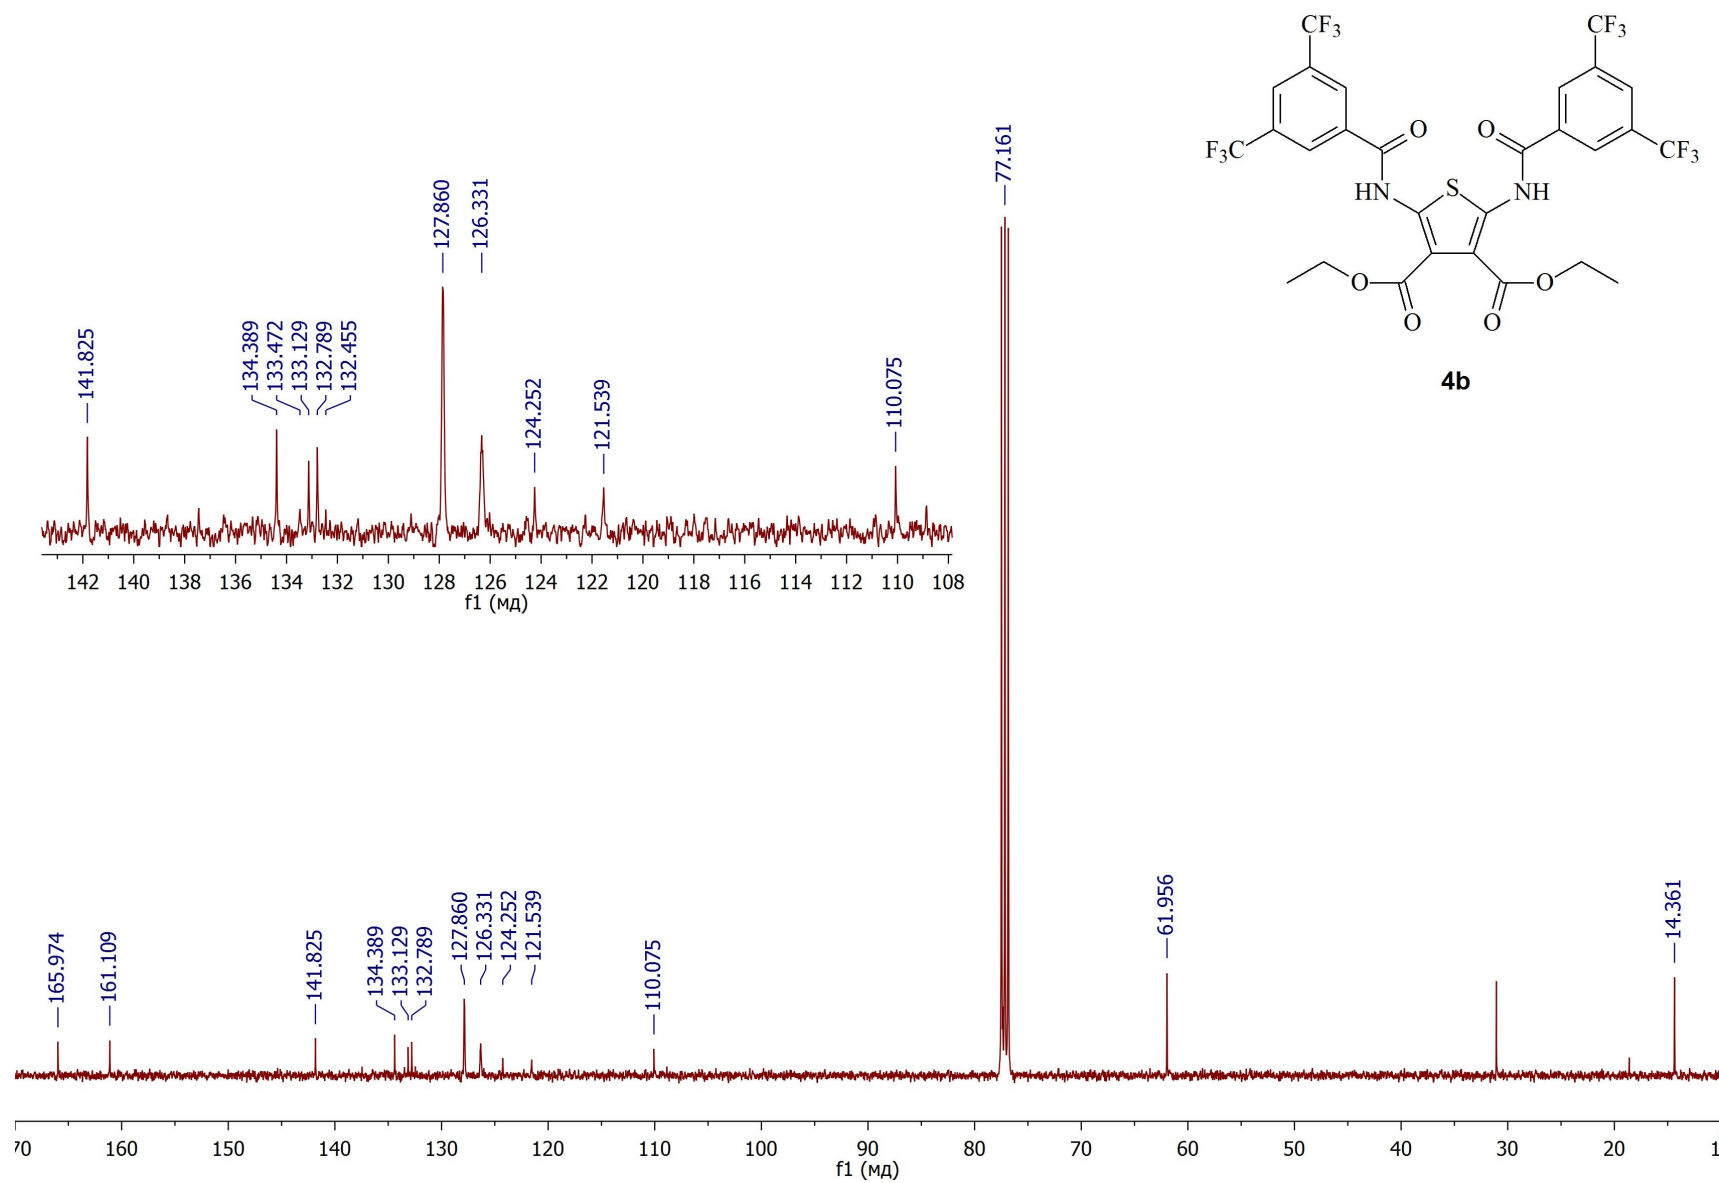Figure SM-38.  $^{13}\text{C}$  NMR spectrum of **4b**

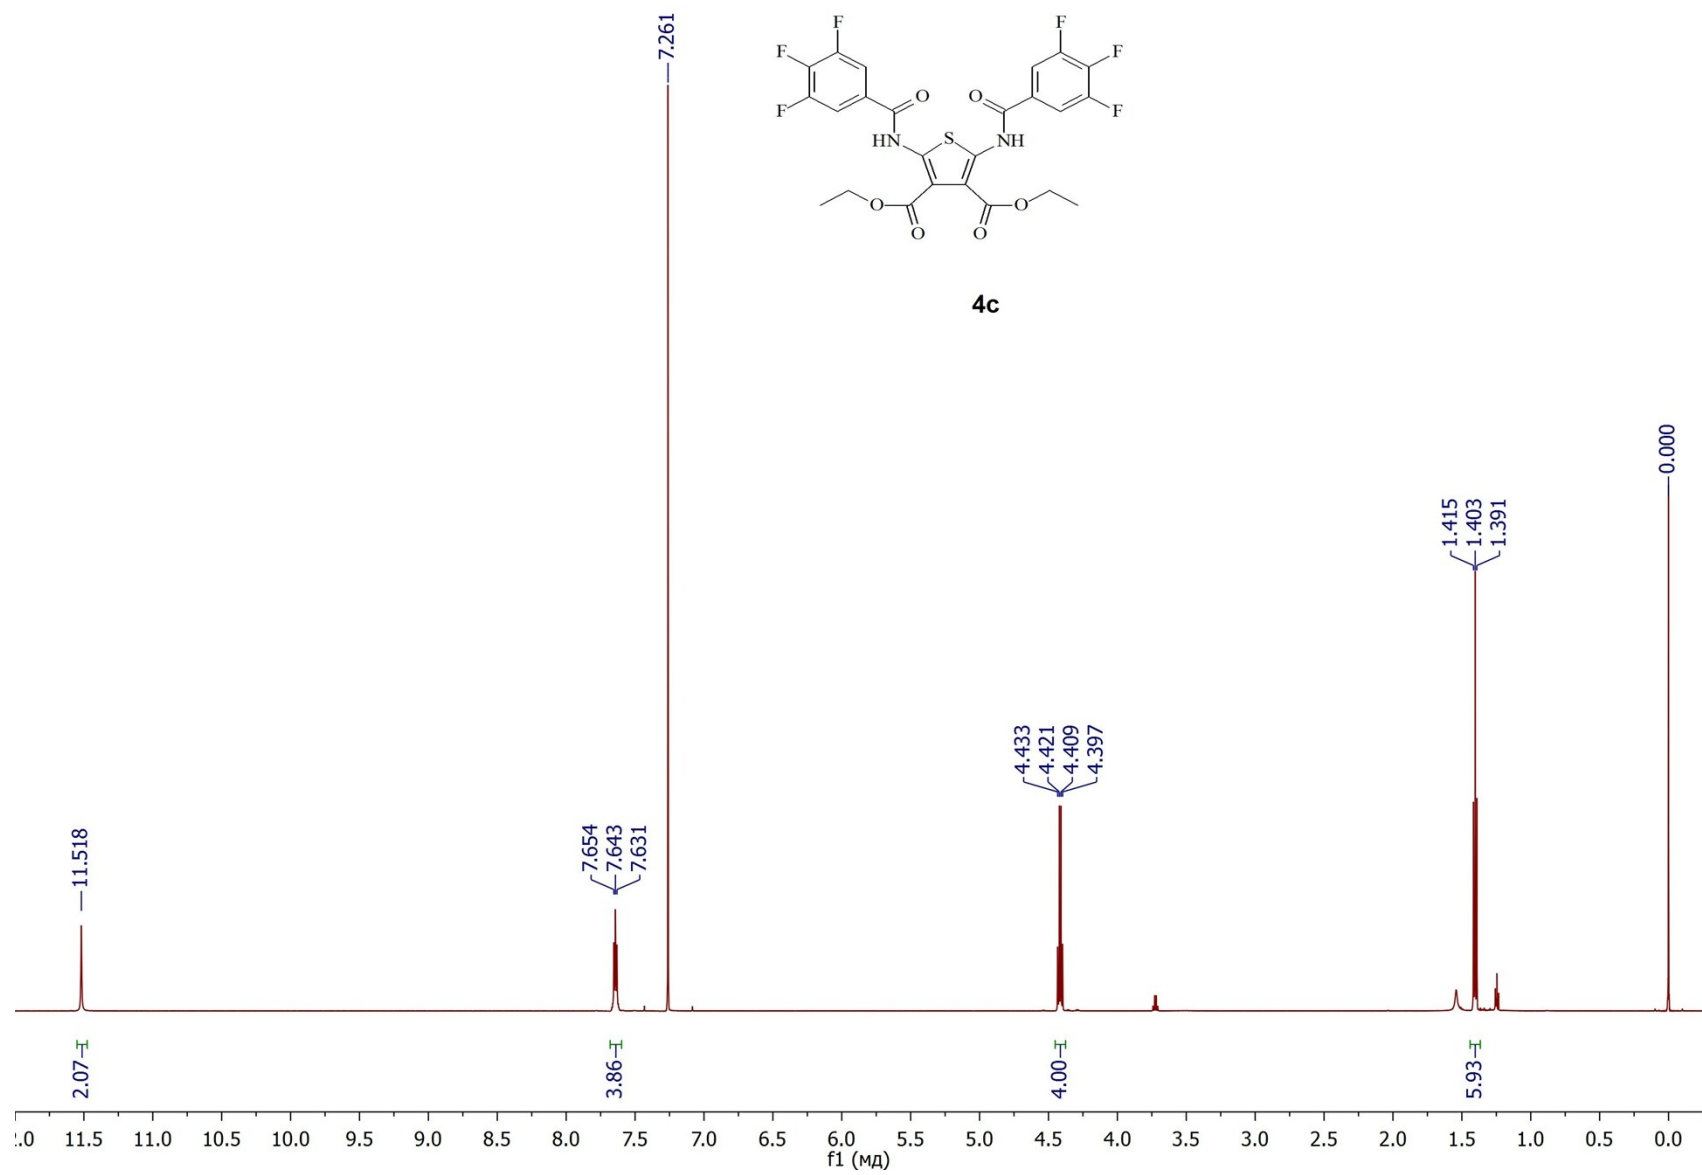

Figure SM-39. <sup>1</sup>H NMR spectrum of 4c

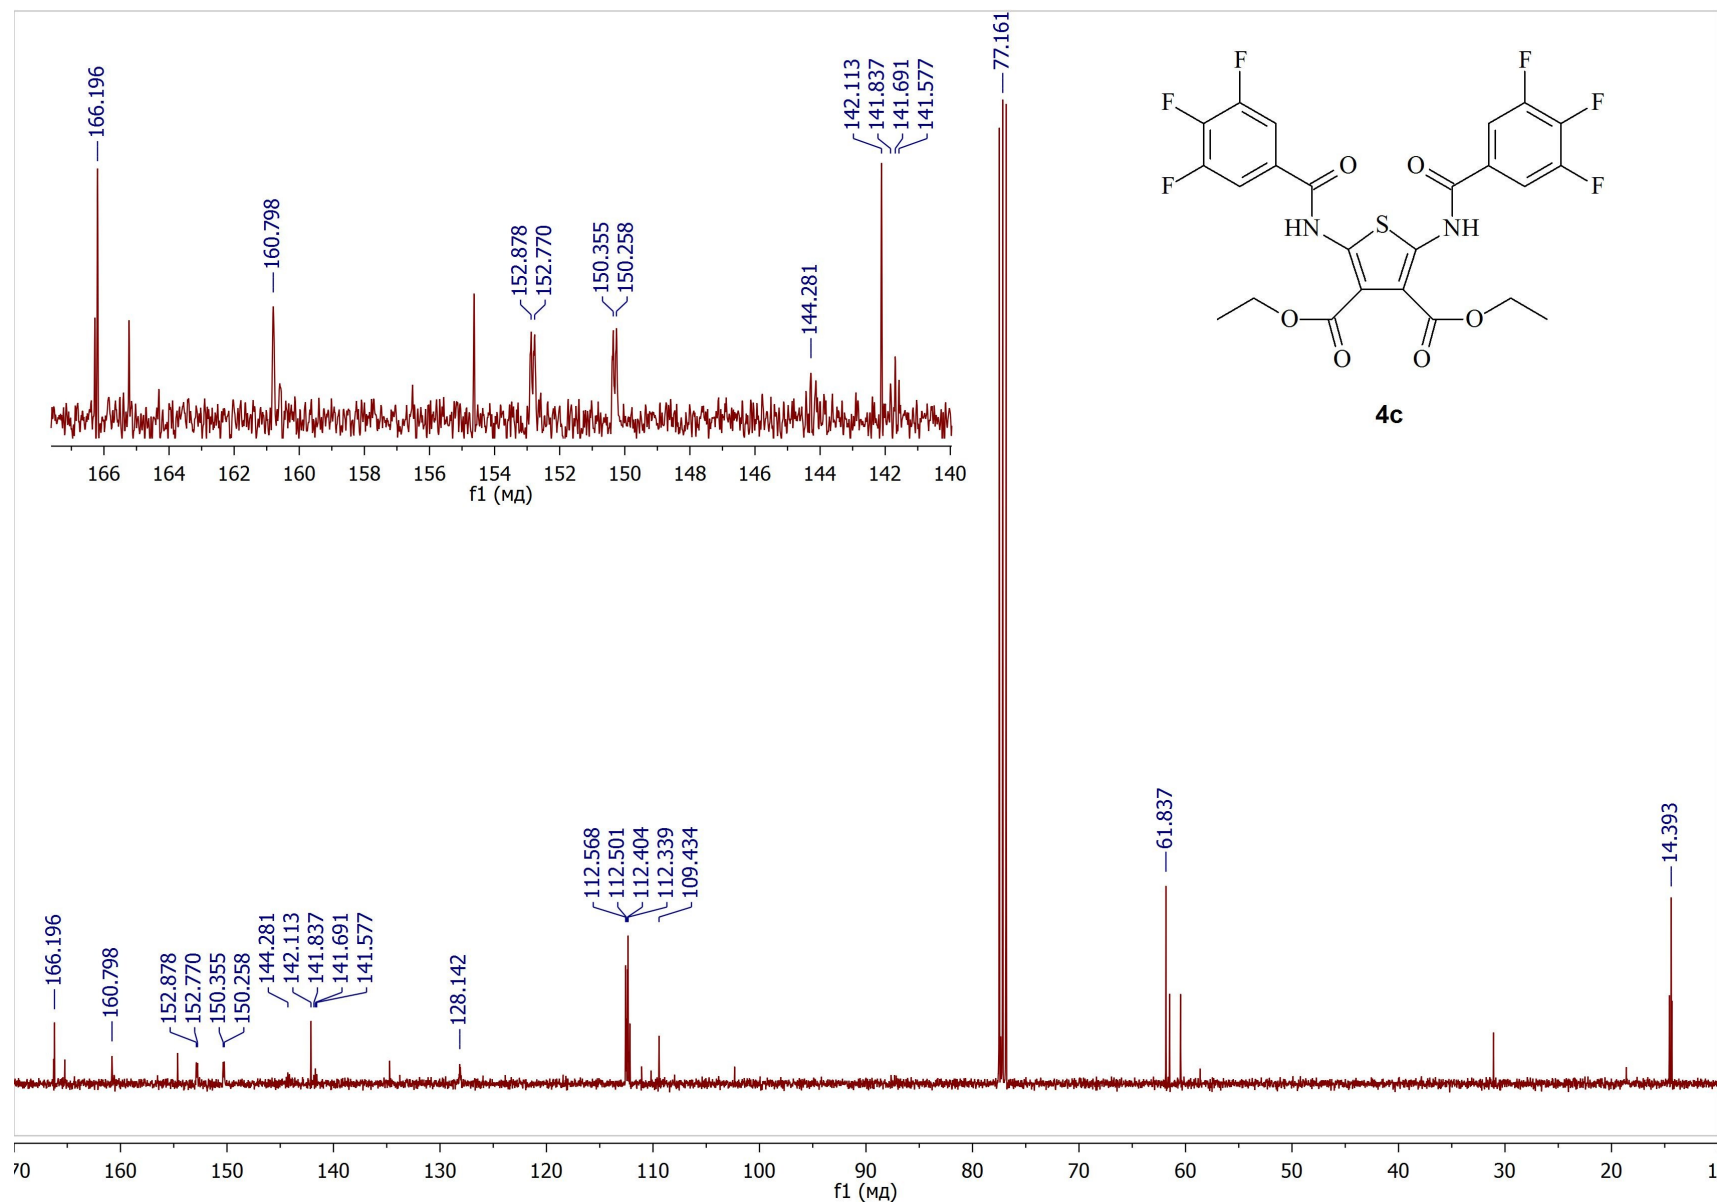

Figure SM-40.  $^{13}\text{C}$  NMR spectrum of **4c**

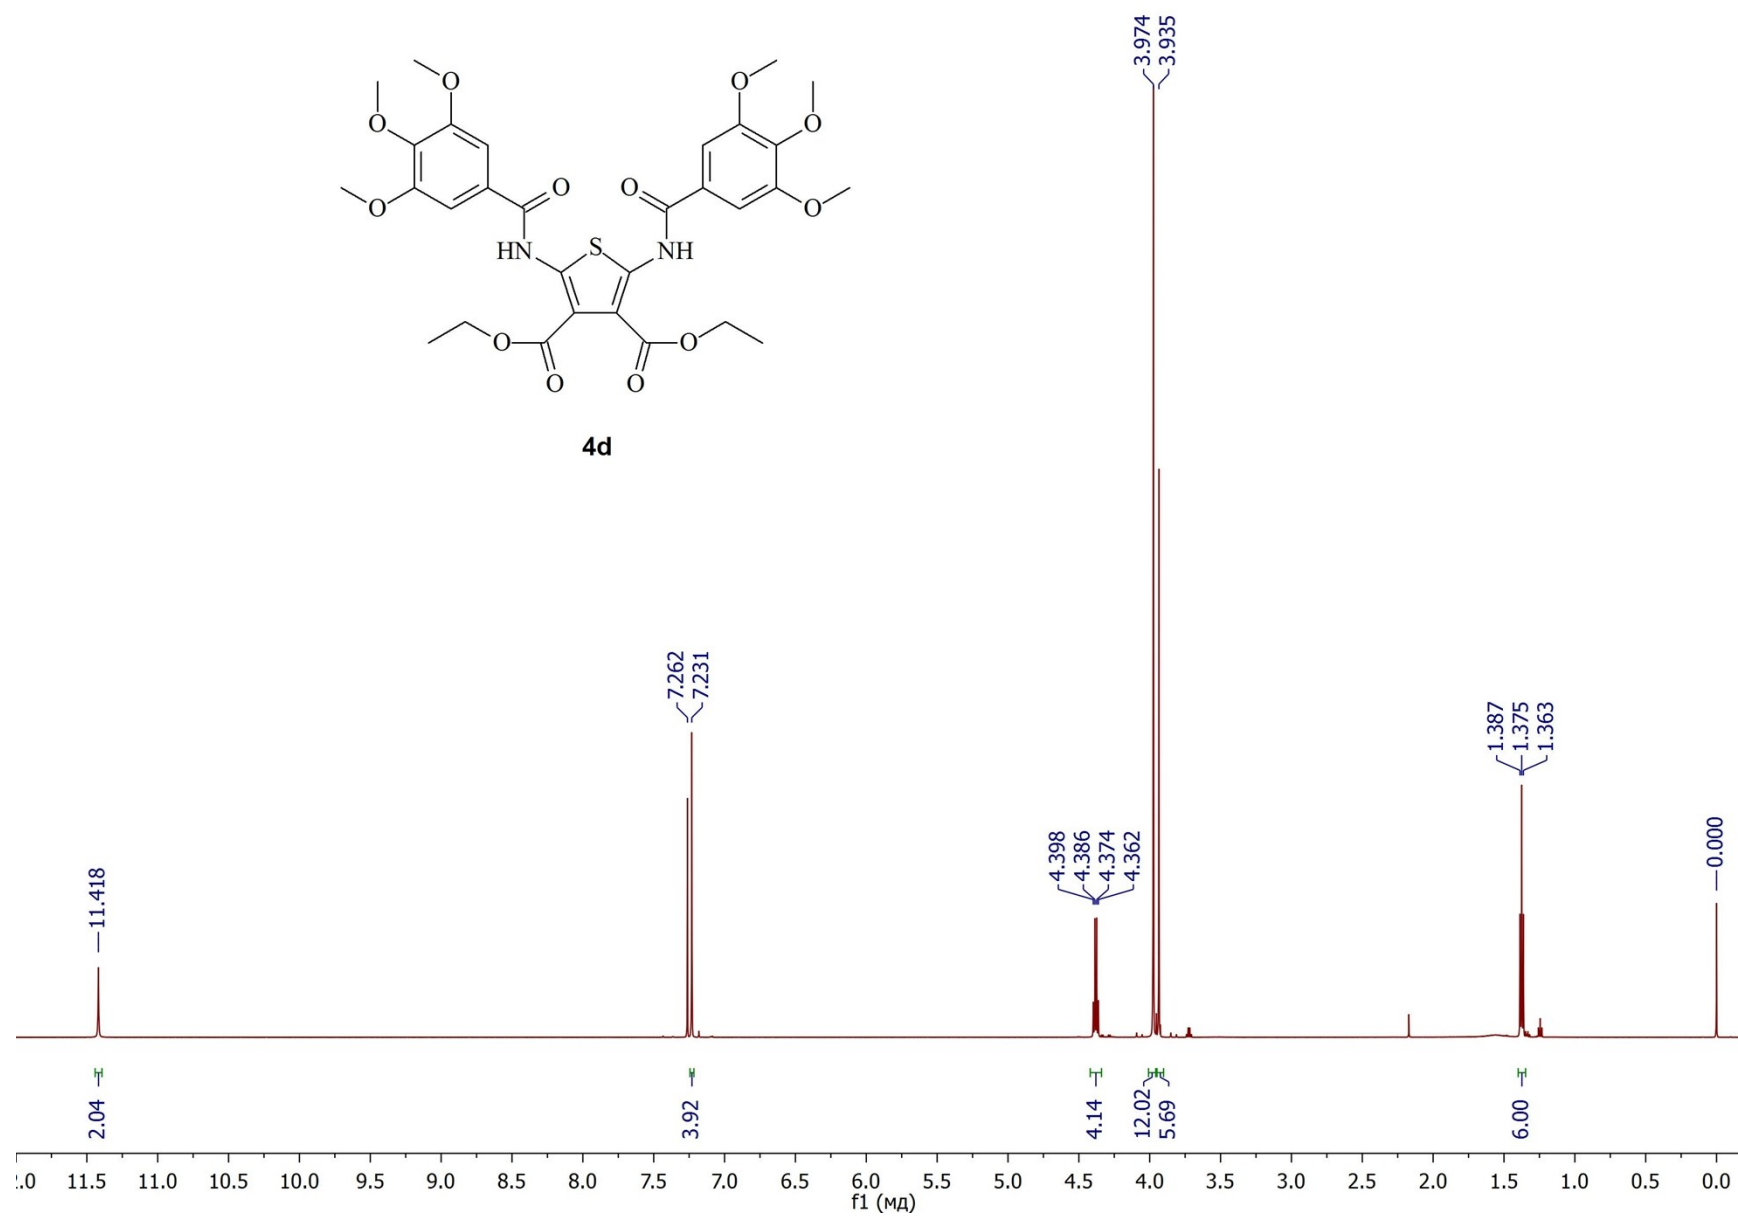

Figure SM-41.  $^1\text{H}$  NMR spectrum of 4d

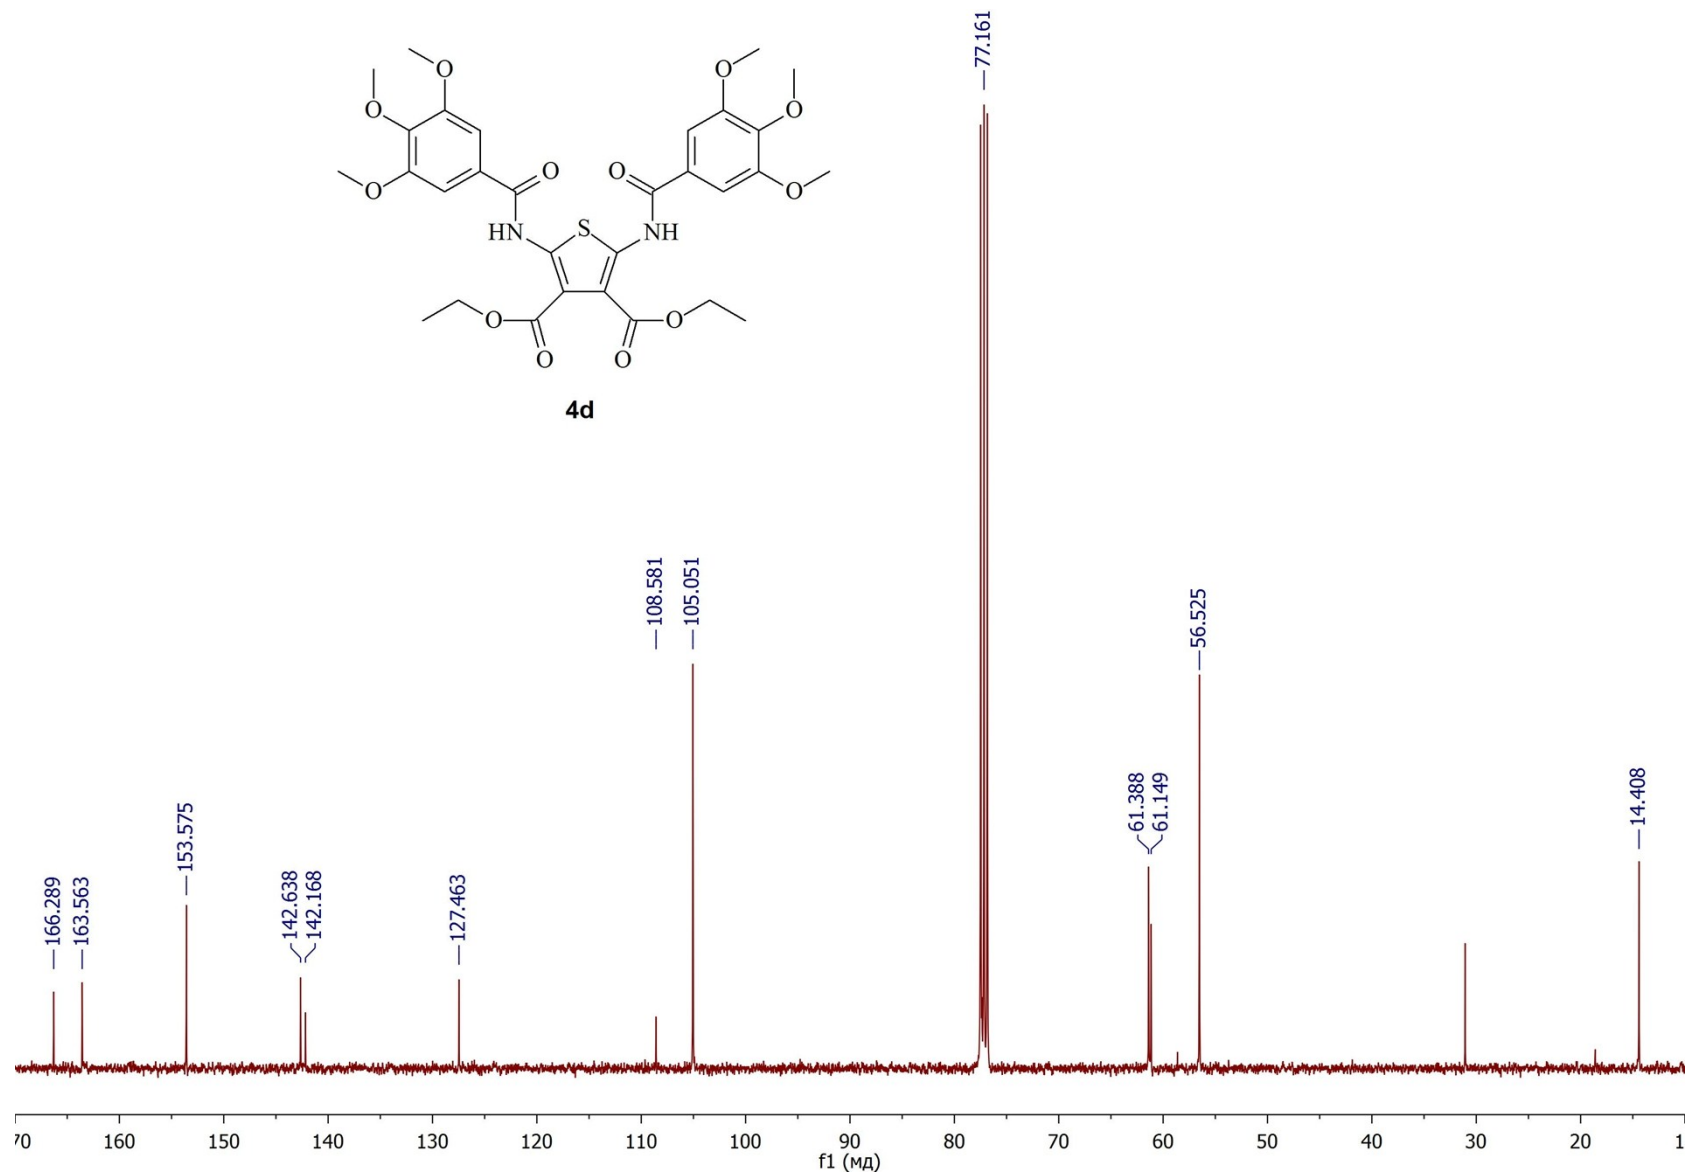

Figure SM-42. <sup>13</sup>C NMR spectrum of 4d

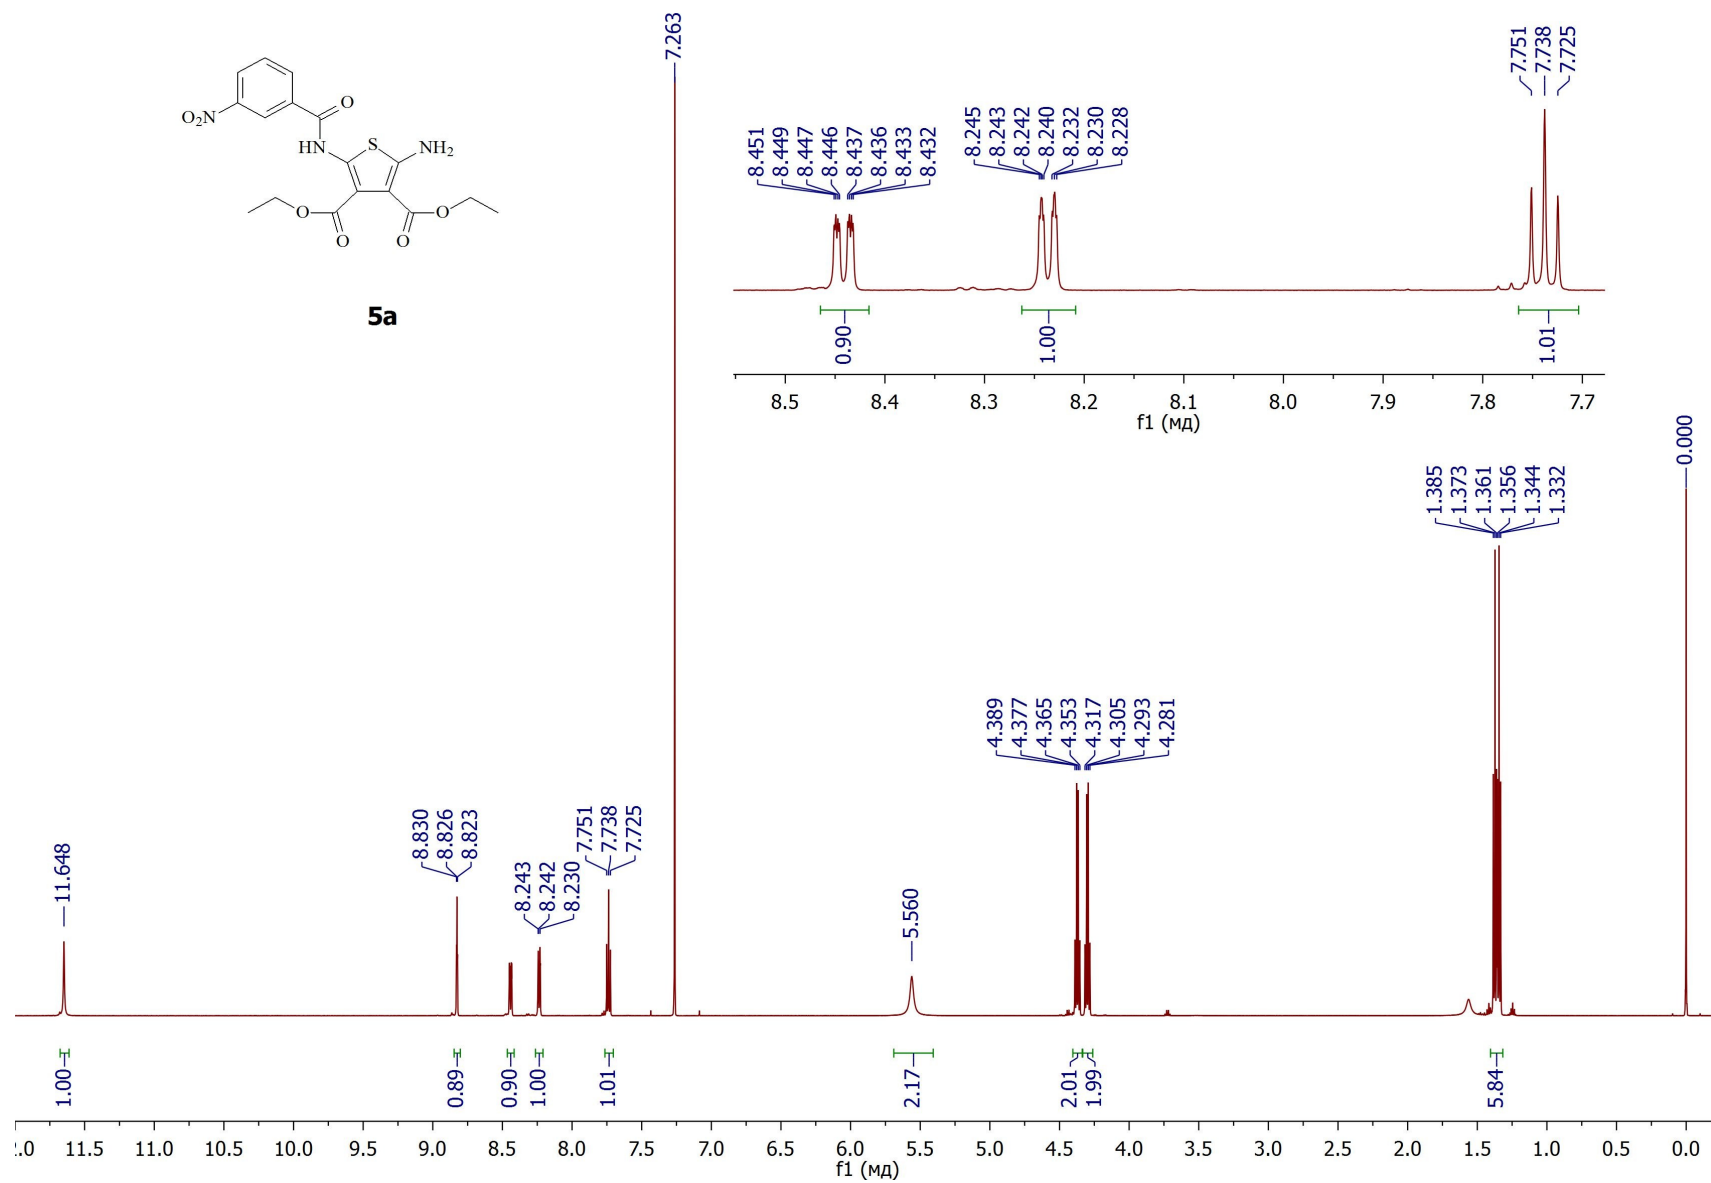Figure SM-43. <sup>1</sup>H NMR spectrum of 5a



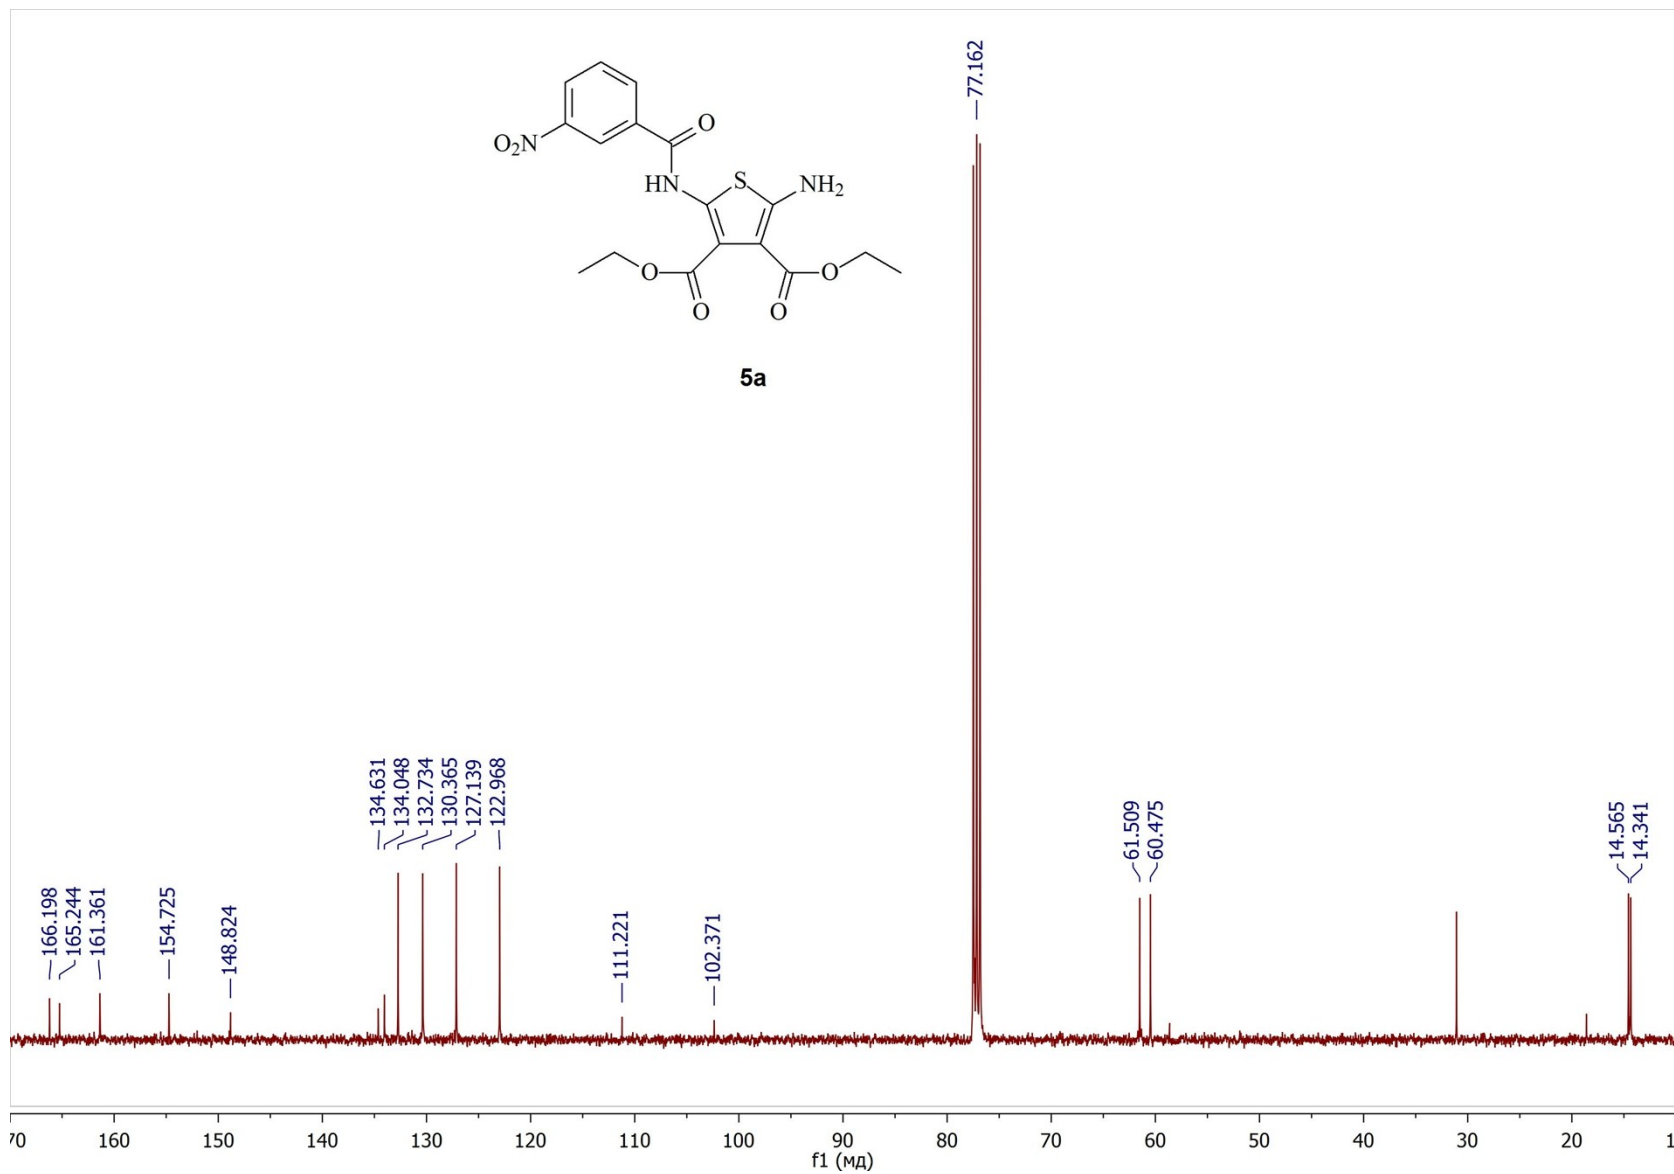

Figure SM-44.  $^{13}\text{C}$  NMR spectrum of **5a**

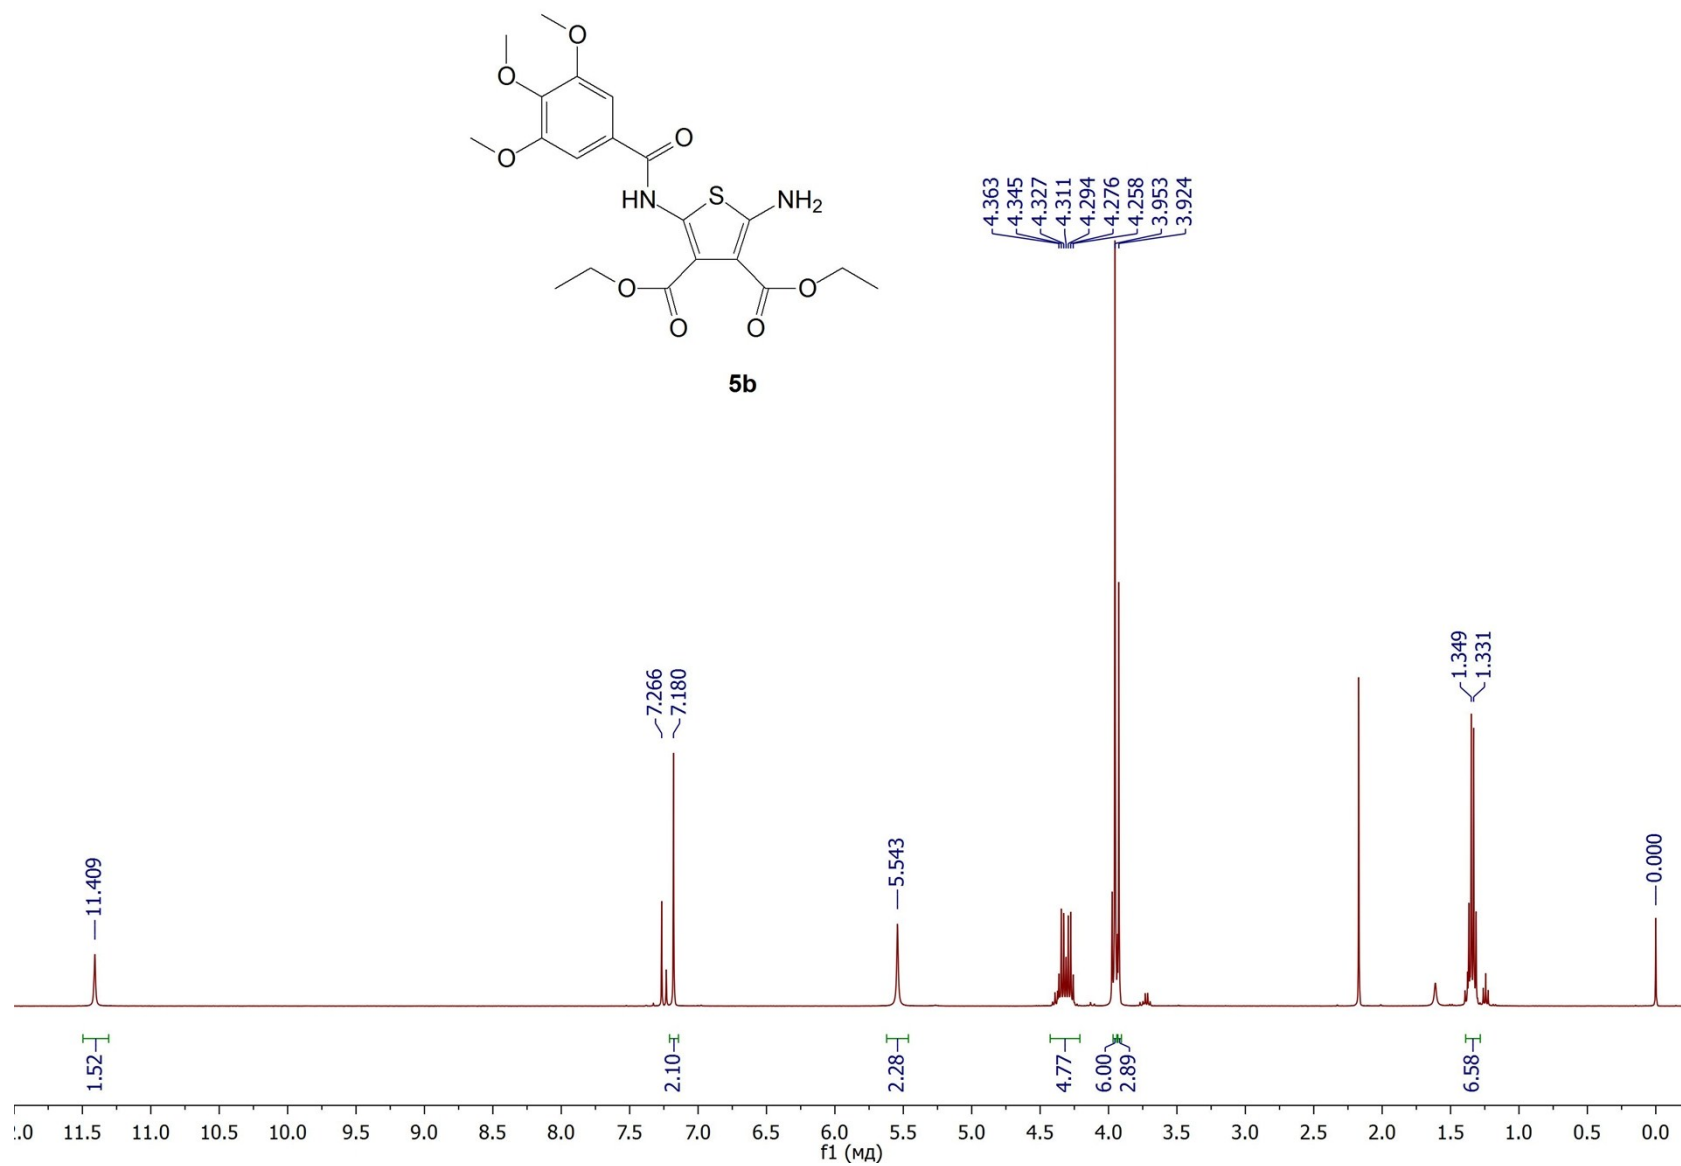

Figure SM-45. <sup>1</sup>H NMR spectrum of 5b

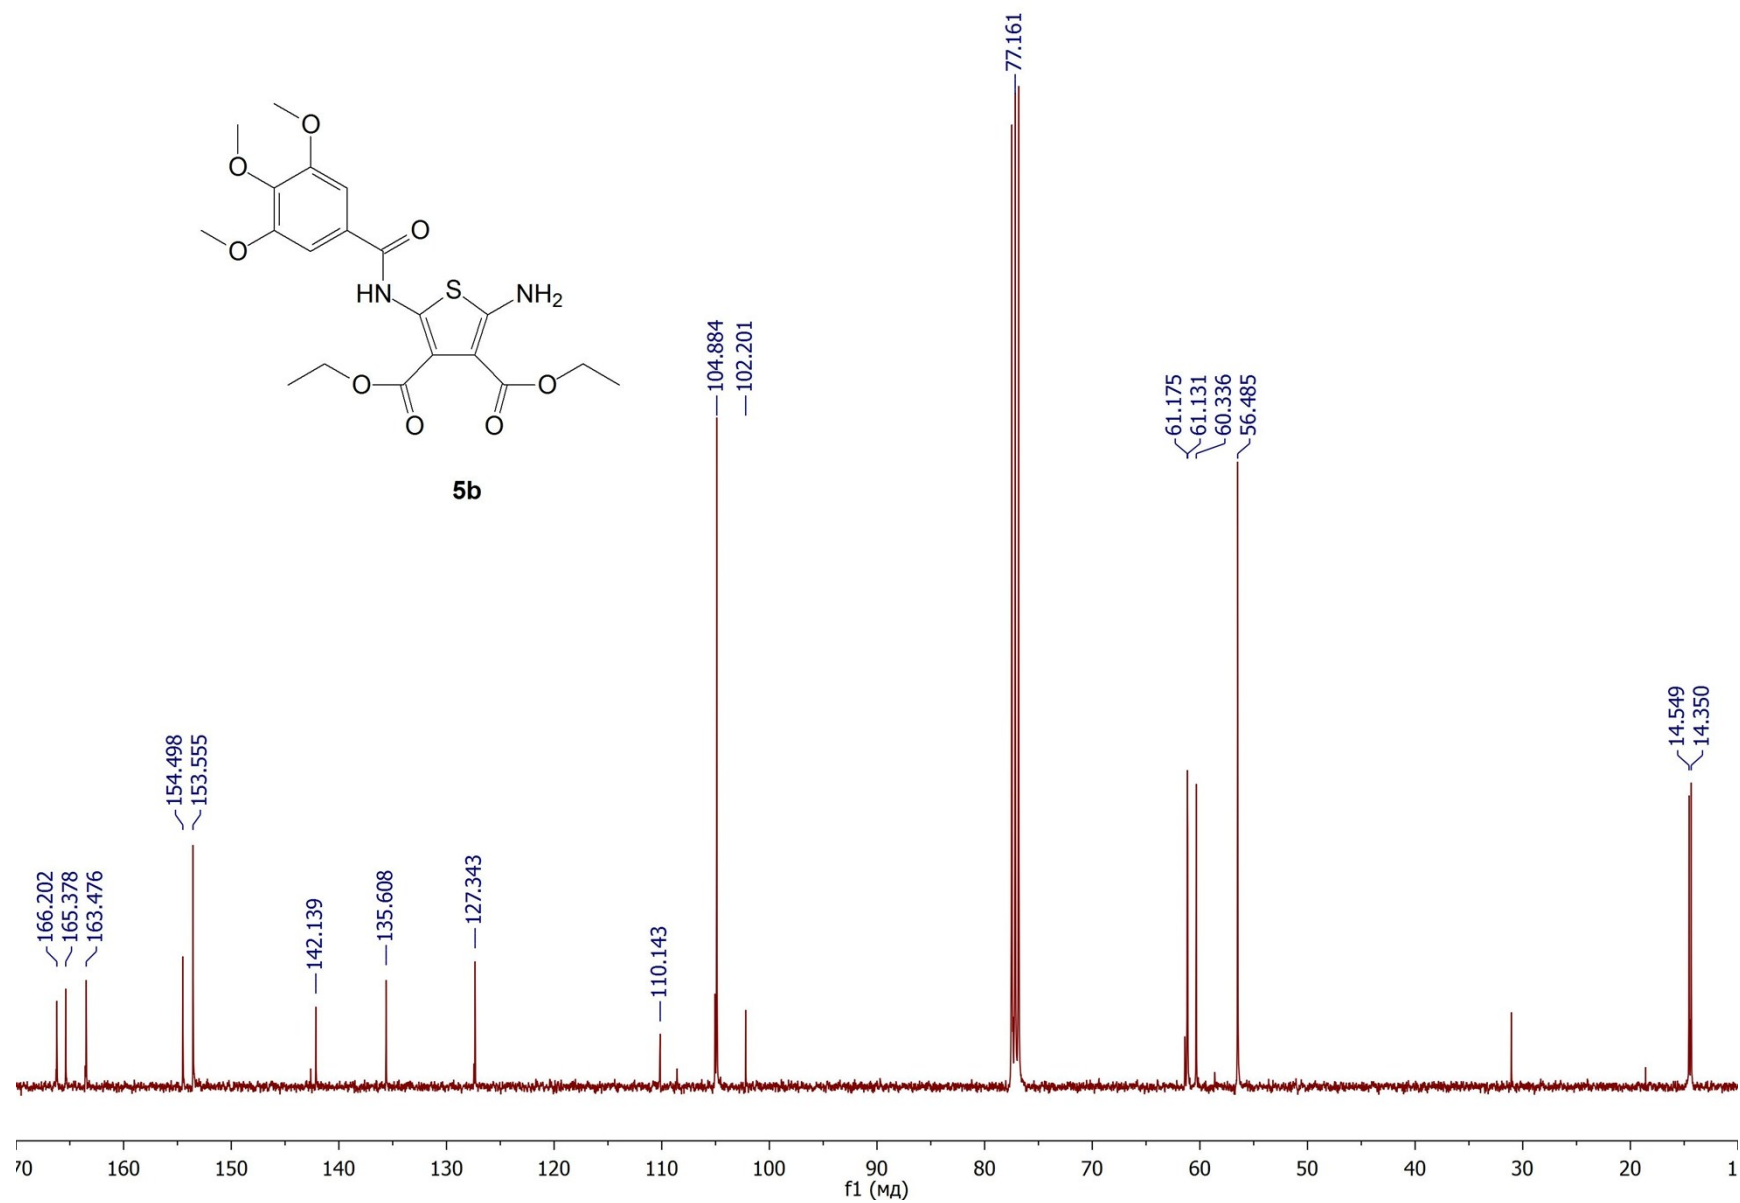

Figure SM-46.  $^{13}\text{C}$  NMR spectrum of **5b**

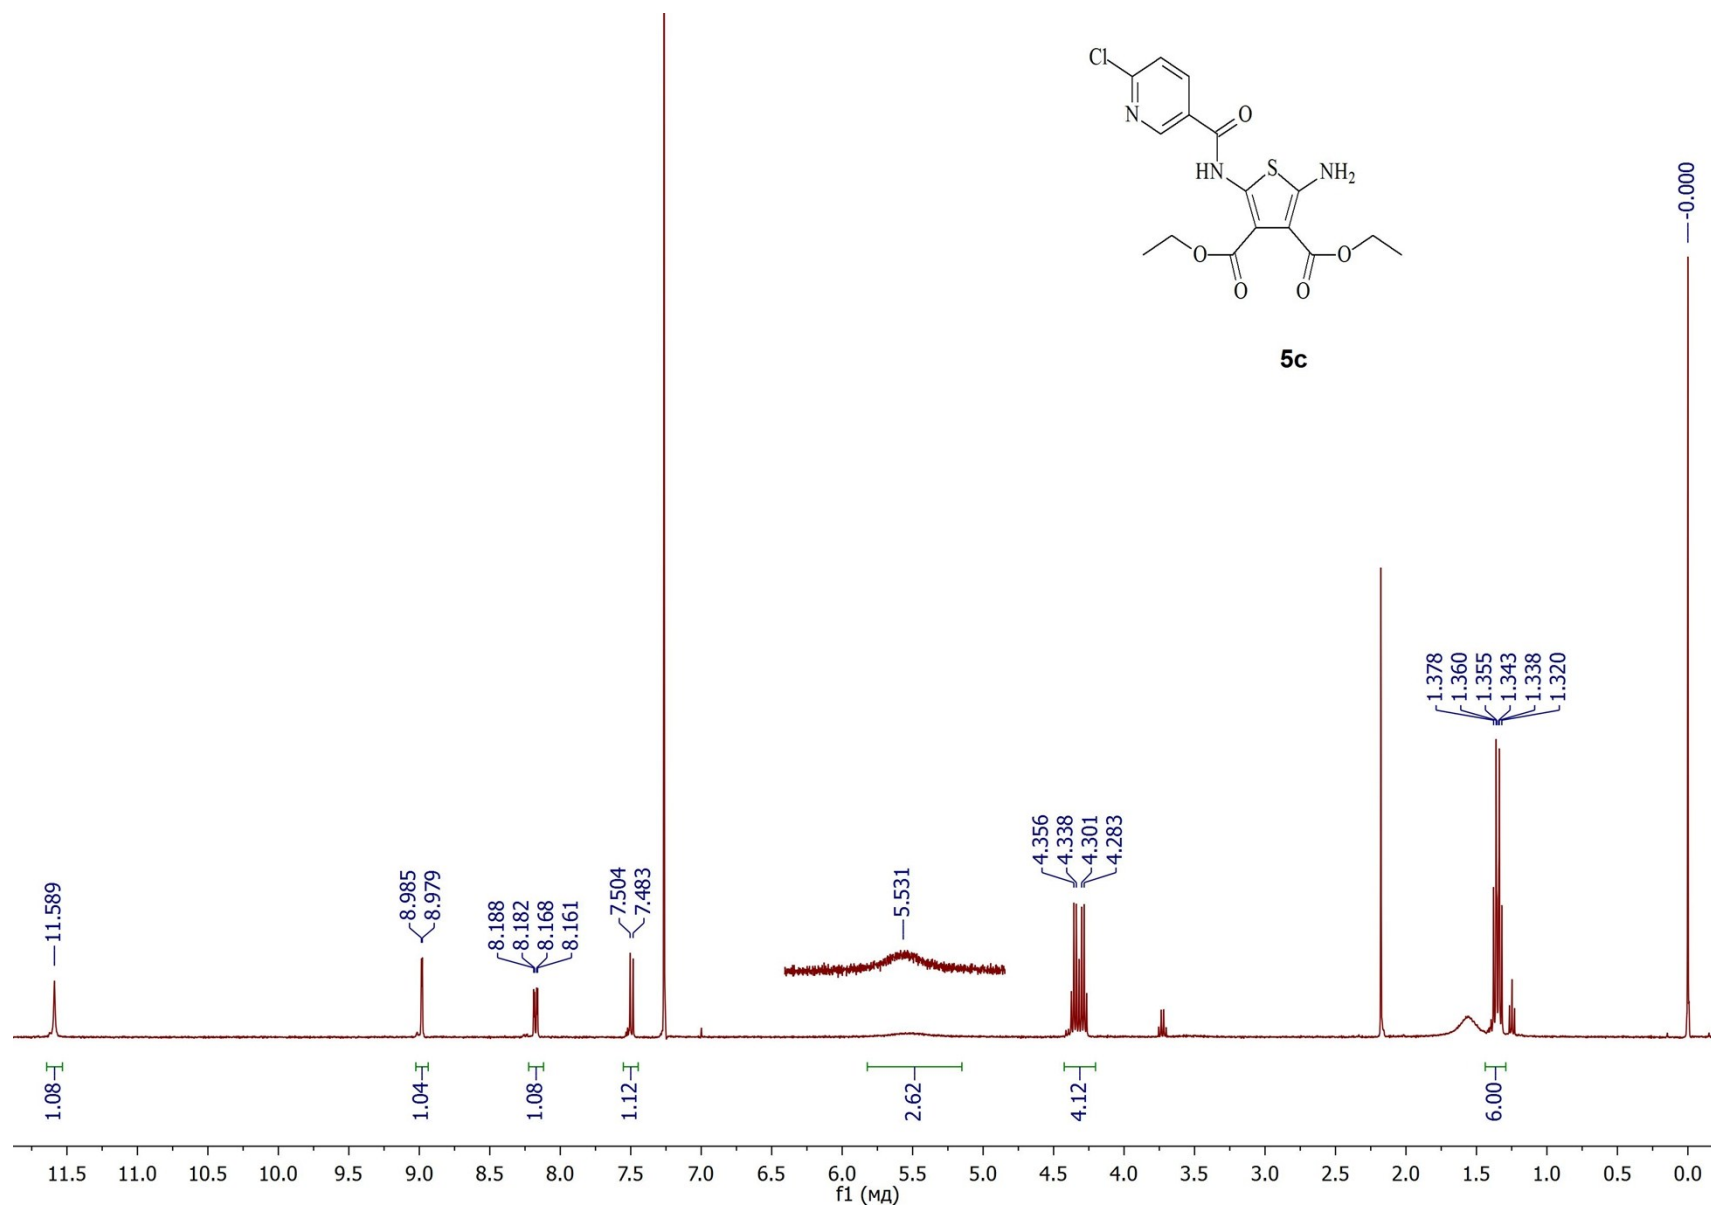

Figure SM-47. <sup>1</sup>H NMR spectrum of 5c

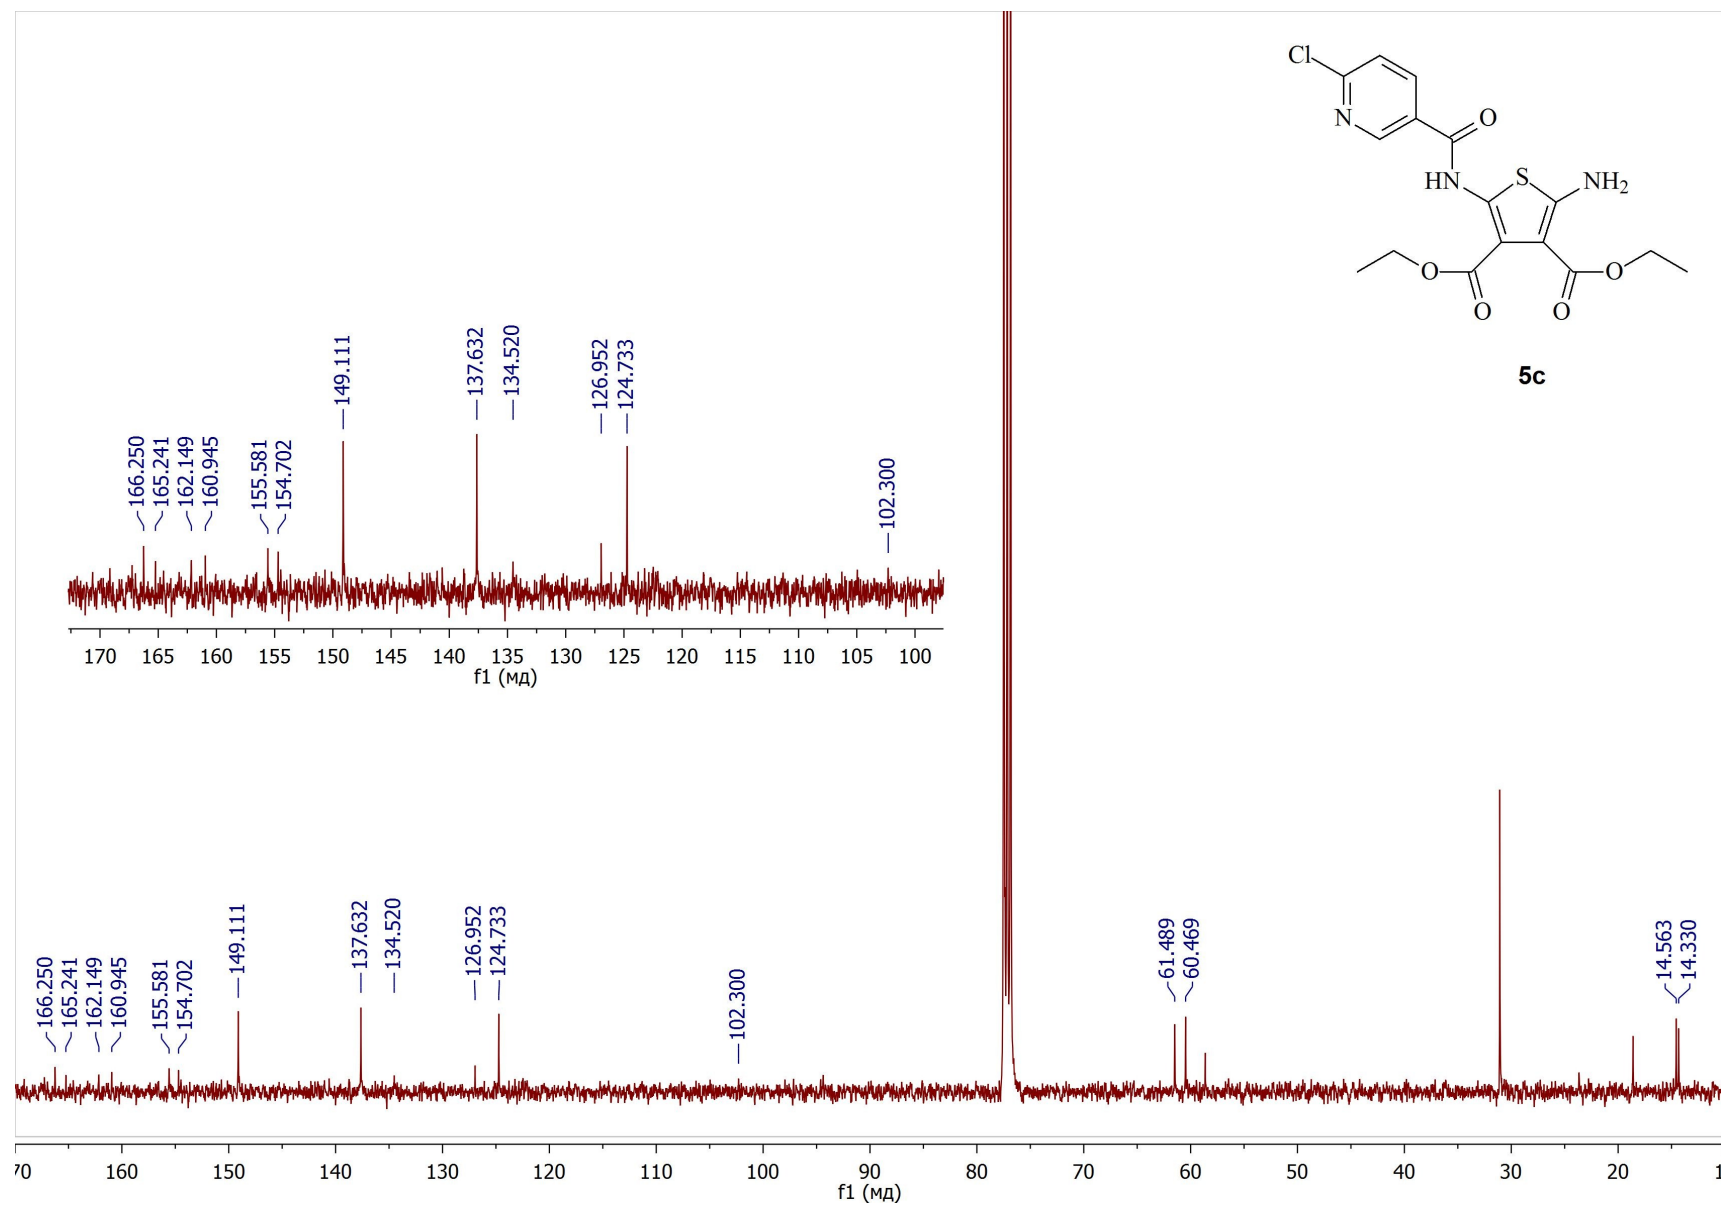

Figure SM-48.  $^{13}\text{C}$  NMR spectrum of **5c**
